# Supplementary material for: Loss of Integrin-Linked Kinase Sensitizes Breast Cancer to SRC Inhibitors
Source: Oxford University Press journal article supplement (doi:10.1158/0008-5472.can-21-0373), 2021-12-17
Supplement: can-21-0373_supplementary_dataset_1_supp1.xlsx [file can-21-0373_supplementary_dataset_1_supp1.xlsx]

## Sheet: 260140_3_supp_7541929_r2pbm7
GENE	sumZ.T27	numObs.T27	normZ.T27	pval_synth.T27	rank_synth.T27	fdr_synth.T27	pval_supp.T27	rank_supp.T27	fdr_supp.T27	sumZ.T19	numObs.T19	normZ.T19	pval_synth.T19	rank_synth.T19	fdr_synth.T19	pval_supp.T19	rank_supp.T19	fdr_supp.T19
ILK	-27.96	8	-7.65	1.04e-14	1	1.87e-10	1	18053	1	-33.96	8	-9.39	2.98e-21	1	5.39e-17	1	18054	1
PARVA	-27.38	8	-7.49	3.53e-14	2	3.18e-10	1	18052	1	-33.31	8	-9.21	1.64e-20	2	1.48e-16	1	18053	1
PPP1R15B	-25.27	8	-6.9	2.56e-12	3	1.54e-08	1	18051	1	-27.84	8	-7.69	7.53e-15	3	4.53e-11	1	18052	1
PHF8	-21.86	8	-5.96	1.26e-09	4	5.67e-06	1	18050	1	-22.25	8	-6.13	4.3e-10	4	1.94e-06	1	18051	1
MESDC2	-21.21	8	-5.78	3.74e-09	5	1.35e-05	1	18049	1	-19.66	8	-5.41	3.12e-08	8	7.04e-05	1	18047	1
STT3A	-17.17	8	-4.66	1.56e-06	6	0.00438	1	18048	1	-21.82	8	-6.01	9.1e-10	5	3.28e-06	1	18050	1
TYMS	-17.11	8	-4.65	1.7e-06	7	0.00438	1	18047	1	-13.09	8	-3.58	0.000169	26	0.113	1	18029	1
TRIP4	-16.9	8	-4.59	2.24e-06	8	0.00505	1	18046	1	-14.9	8	-4.09	2.18e-05	18	0.0219	1	18037	1
CTNNAL1	-16.27	8	-4.41	5.08e-06	9	0.0102	1	18045	1	-6.11	8	-1.64	0.0502	851	0.975	0.95	17204	0.996
ZNF8	-15.77	8	-4.27	9.57e-06	10	0.0173	1	18044	1	-11.78	8	-3.22	0.000638	43	0.268	0.999	18012	1
LDLR	-15.6	8	-4.23	1.17e-05	11	0.0191	1	18043	1	-12.96	8	-3.55	0.000194	30	0.113	1	18025	1
HSP90B1	-15.53	8	-4.21	1.27e-05	12	0.0191	1	18042	1	-18.38	8	-5.06	2.15e-07	9	0.000431	1	18046	1
EED	-15.2	8	-4.12	1.9e-05	13	0.0264	1	18041	1	-13.81	8	-3.79	7.68e-05	22	0.063	1	18033	1
CHP1	-15.13	8	-4.1	2.06e-05	14	0.0266	1	18040	1	-13.71	8	-3.76	8.57e-05	24	0.0645	1	18031	1
LIMS1	-14.98	8	-4.06	2.49e-05	15	0.0293	1	18039	1	-15.45	8	-4.24	1.12e-05	15	0.0134	1	18040	1
ZNF598	-14.93	8	-4.04	2.64e-05	16	0.0293	1	18038	1	-16.7	8	-4.59	2.24e-06	12	0.00337	1	18043	1
GGNBP2	-12.9	6	-4.03	2.76e-05	17	0.0293	1	18037	1	-17.24	6	-5.48	2.13e-08	7	5.49e-05	1	18048	1
FBXW7	-14.42	8	-3.9	4.75e-05	18	0.0454	1	18036	1	-15.71	8	-4.31	7.99e-06	13	0.0111	1	18042	1
AMBRA1	-14.42	8	-3.9	4.78e-05	19	0.0454	1	18035	1	-13.91	8	-3.81	6.84e-05	20	0.0617	1	18035	1
GPR114	-14.06	8	-3.8	7.15e-05	20	0.0646	1	18034	1	-12.96	8	-3.55	0.000193	29	0.113	1	18026	1
MSL2	-14	8	-3.79	7.62e-05	21	0.0655	1	18033	1	-9.35	8	-2.55	0.00545	116	0.818	0.995	17939	1
MAP2K1	-13.67	8	-3.7	0.00011	22	0.0861	1	18032	1	-21.59	8	-5.95	1.36e-09	6	4.1e-06	1	18049	1
CRYBG3	-13.67	8	-3.7	0.00011	23	0.0861	1	18031	1	-13.07	8	-3.58	0.000173	27	0.113	1	18028	1
RCOR2	-13.4	8	-3.62	0.000147	24	0.11	1	18030	1	-13.83	8	-3.79	7.48e-05	21	0.063	1	18034	1
PDHA1	-12.83	8	-3.46	0.000268	25	0.193	1	18029	1	-14.98	8	-4.11	1.97e-05	17	0.0209	1	18038	1
DACH2	-12.48	8	-3.37	0.000382	26	0.266	1	18028	1	-2.72	8	-0.7	0.242	4097	0.975	0.758	13958	0.98
ATXN7L3	-12.34	8	-3.33	0.000439	27	0.289	1	18027	1	-6.16	8	-1.66	0.0487	821	0.975	0.951	17234	0.996
EIF2A	-12.32	8	-3.32	0.000448	28	0.289	1	18026	1	-15.15	8	-4.16	1.6e-05	16	0.0181	1	18039	1
CASC1	-12.28	8	-3.31	0.000466	29	0.29	1	18025	1	-7.1	8	-1.92	0.0275	469	0.975	0.973	17586	0.998
SUZ12	-12.24	8	-3.3	0.000484	30	0.291	1	18024	1	-10.66	8	-2.91	0.00181	66	0.494	0.998	17989	1
HTR1D	-12.14	8	-3.27	0.000531	31	0.296	0.999	18023	1	-5.87	8	-1.58	0.0574	952	0.975	0.943	17103	0.995
OVOL1	-12.13	8	-3.27	0.000538	32	0.296	0.999	18022	1	-7.03	8	-1.9	0.0288	494	0.975	0.971	17561	0.998
SERPINH1	-12.1	8	-3.26	0.000553	33	0.296	0.999	18021	1	-9.58	8	-2.61	0.00454	103	0.787	0.995	17952	1
MTO1	-12.09	8	-3.26	0.000558	34	0.296	0.999	18020	1	-8.72	8	-2.37	0.00892	181	0.886	0.991	17874	1
SDHD	-12.03	8	-3.24	0.000594	35	0.302	0.999	18019	1	-6.68	8	-1.8	0.0357	601	0.975	0.964	17454	0.997
SIK2	-12.02	8	-3.24	0.000602	36	0.302	0.999	18018	1	-10.83	8	-2.96	0.00155	57	0.488	0.998	17998	1
SRPR	-11.82	8	-3.18	0.00073	37	0.356	0.999	18017	1	-7.43	8	-2.01	0.0222	378	0.975	0.978	17677	0.999
ROCK1	-11.71	8	-3.15	0.000809	38	0.384	0.999	18016	1	-7.44	8	-2.01	0.022	373	0.975	0.978	17682	0.999
KIAA0355	-11.65	8	-3.14	0.000852	39	0.394	0.999	18015	1	-10.49	8	-2.86	0.00211	73	0.522	0.998	17982	1
NPC1	-11.59	8	-3.12	0.000904	40	0.402	0.999	18014	1	-3.83	8	-1.01	0.156	2594	0.975	0.844	15461	0.985
PPP1R12C	-11.56	8	-3.11	0.000931	41	0.402	0.999	18013	1	-6.26	8	-1.68	0.0461	778	0.975	0.954	17277	0.996
GRIA4	-11.54	8	-3.11	0.000951	42	0.402	0.999	18012	1	-9.11	8	-2.48	0.00662	143	0.824	0.993	17912	1
PPP1R1A	-11.5	8	-3.1	0.000981	43	0.402	0.999	18011	1	-2.77	8	-0.71	0.238	4022	0.975	0.762	14033	0.98
FBF1	-11.49	8	-3.09	0.000995	44	0.402	0.999	18010	1	-9.56	8	-2.6	0.00462	106	0.787	0.995	17949	1
OR8G5	-11.48	8	-3.09	0.001	45	0.402	0.999	18009	1	-10.1	8	-2.75	0.00295	83	0.643	0.997	17972	1
SMIM5	-11.14	8	-3	0.00137	46	0.518	0.999	18008	1	-8.96	8	-2.44	0.00743	157	0.851	0.993	17898	1
CMTM6	-11.1	8	-2.98	0.00143	47	0.518	0.999	18007	1	-5.48	8	-1.47	0.071	1172	0.975	0.929	16883	0.993
MSL1	-11.09	8	-2.98	0.00143	48	0.518	0.999	18006	1	-8.08	8	-2.19	0.0142	264	0.967	0.986	17791	1
TROAP	-11.09	8	-2.98	0.00143	49	0.518	0.999	18005	1	-4.58	8	-1.22	0.112	1841	0.975	0.888	16214	0.989
ALG8	-11.09	8	-2.98	0.00143	50	0.518	0.999	18004	1	-15.52	8	-4.26	1.02e-05	14	0.0131	1	18041	1
RS1	-11.05	8	-2.97	0.00149	51	0.525	0.999	18003	1	-7.11	8	-1.92	0.0274	465	0.975	0.973	17590	0.998
ARSA	-11.03	8	-2.97	0.00151	52	0.525	0.998	18002	1	-8.7	8	-2.36	0.00908	184	0.891	0.991	17871	1
PTDSS1	-10.97	8	-2.95	0.0016	53	0.538	0.998	18001	1	-7.47	8	-2.02	0.0216	367	0.975	0.978	17688	0.999
STIP1	-10.95	8	-2.94	0.00162	54	0.538	0.998	18000	1	-9.2	8	-2.5	0.00615	134	0.824	0.994	17921	1
TMED9	-10.94	8	-2.94	0.00164	55	0.538	0.998	17999	1	-8.73	8	-2.37	0.00884	177	0.886	0.991	17878	1
MTR	-10.9	8	-2.93	0.0017	56	0.548	0.998	17998	1	-10.91	8	-2.98	0.00145	55	0.475	0.999	18000	1
TBL1XR1	-10.81	8	-2.9	0.00184	57	0.578	0.998	17997	1	-12.51	8	-3.42	0.000309	34	0.164	1	18021	1
ABCC12	-10.79	8	-2.9	0.00187	58	0.578	0.998	17996	1	-6.85	8	-1.85	0.0323	549	0.975	0.968	17506	0.998
VCL	-10.78	8	-2.9	0.00189	59	0.578	0.998	17995	1	-13.73	8	-3.76	8.41e-05	23	0.0645	1	18032	1
TAMM41	-10.73	8	-2.88	0.00197	60	0.594	0.998	17994	1	-2.69	8	-0.69	0.244	4129	0.975	0.756	13926	0.98
UQCC2	-10.7	8	-2.88	0.00202	61	0.598	0.998	17993	1	-6.84	8	-1.85	0.0324	551	0.975	0.968	17504	0.998
ETV5	-10.66	8	-2.86	0.0021	62	0.603	0.998	17992	1	-8.79	8	-2.39	0.00843	171	0.886	0.992	17884	1
NTRK2	-10.66	8	-2.86	0.0021	63	0.603	0.998	17991	1	-9.21	8	-2.51	0.0061	131	0.824	0.994	17924	1
APOBR	-10.63	8	-2.86	0.00215	64	0.607	0.998	17990	1	-6.71	8	-1.81	0.035	589	0.975	0.965	17466	0.997
SLC17A6	-10.55	8	-2.83	0.00231	65	0.636	0.998	17989	1	-9.57	8	-2.61	0.00459	105	0.787	0.995	17950	1
RNF25	-10.54	8	-2.83	0.00233	66	0.636	0.998	17988	1	-7.23	8	-1.95	0.0253	430	0.975	0.975	17625	0.998
FRYL	-10.51	8	-2.82	0.00238	67	0.642	0.998	17987	1	-8.28	8	-2.25	0.0123	234	0.949	0.988	17821	1
HMG20A	-10.49	8	-2.82	0.00244	68	0.647	0.998	17986	1	-9.07	8	-2.47	0.00681	147	0.824	0.993	17908	1
PTGDR2	-10.47	8	-2.81	0.00248	69	0.647	0.998	17985	1	-7.96	8	-2.16	0.0154	281	0.975	0.985	17774	1
BSCL2	-10.44	8	-2.8	0.00253	70	0.647	0.997	17984	1	-8.45	8	-2.29	0.0109	215	0.913	0.989	17840	1
HDDC2	-10.44	8	-2.8	0.00255	71	0.647	0.997	17983	1	-8.6	8	-2.33	0.00978	197	0.896	0.99	17858	1
LMTK2	-10.38	8	-2.78	0.00268	72	0.672	0.997	17982	1	-10.5	8	-2.87	0.00208	72	0.522	0.998	17983	1
CNOT1	-10.35	8	-2.78	0.00274	73	0.677	0.997	17981	1	-17.98	8	-4.95	3.79e-07	10	0.000684	1	18045	1
PSMB6	-10.33	8	-2.77	0.00279	74	0.681	0.997	17980	1	-5.96	8	-1.6	0.0545	907	0.975	0.946	17148	0.995
NAF1	-10.31	8	-2.77	0.00284	75	0.682	0.997	17979	1	-6.86	8	-1.85	0.032	540	0.975	0.968	17515	0.998
EZH1	-10.28	8	-2.76	0.00292	76	0.692	0.997	17978	1	-9.87	8	-2.69	0.00357	91	0.702	0.996	17964	1
FXYD5	-10.25	8	-2.75	0.00299	77	0.692	0.997	17977	1	-8.61	8	-2.34	0.0097	193	0.896	0.99	17862	1
KRI1	-10.25	8	-2.75	0.00299	78	0.692	0.997	17976	1	-8.24	8	-2.23	0.0127	238	0.949	0.987	17817	1
MYO1H	-10.23	8	-2.74	0.00303	79	0.693	0.997	17975	1	-2.74	8	-0.71	0.24	4063	0.975	0.76	13992	0.98
SLC1A2	-10.17	8	-2.73	0.0032	80	0.704	0.997	17974	1	-9.65	8	-2.63	0.00431	101	0.77	0.996	17954	1
DDI2	-10.16	8	-2.72	0.00322	81	0.704	0.997	17973	1	-8.39	8	-2.28	0.0114	223	0.92	0.989	17832	1
STRA6	-10.15	8	-2.72	0.00323	82	0.704	0.997	17972	1	-5.68	8	-1.52	0.0639	1072	0.975	0.936	16983	0.995
CHRM1	-10.15	8	-2.72	0.00324	83	0.704	0.997	17971	1	-8.84	8	-2.4	0.00813	167	0.875	0.992	17888	1
C9orf114	-10.12	8	-2.71	0.00332	84	0.708	0.997	17970	1	-4.44	8	-1.18	0.119	1959	0.975	0.881	16096	0.988
EZH2	-10.12	8	-2.71	0.00334	85	0.708	0.997	17969	1	-10	8	-2.72	0.00322	87	0.668	0.997	17968	1
NCOR1	-10.09	8	-2.7	0.00342	86	0.713	0.997	17968	1	-10.1	8	-2.75	0.00295	82	0.643	0.997	17973	1
NR2C2AP	-10.08	8	-2.7	0.00345	87	0.713	0.997	17967	1	-12.68	8	-3.47	0.000261	33	0.143	1	18022	1
VPS53	-10.07	8	-2.7	0.00348	88	0.713	0.997	17966	1	-5.75	8	-1.54	0.0615	1030	0.975	0.938	17025	0.995
CLDN11	-10.05	8	-2.69	0.00353	89	0.713	0.996	17965	1	-6.01	8	-1.62	0.053	893	0.975	0.947	17162	0.996
FAM132B	-10.04	8	-2.69	0.00355	90	0.713	0.996	17964	1	-7.11	8	-1.92	0.0273	463	0.975	0.973	17592	0.998
DEGS1	-9.98	8	-2.67	0.00375	91	0.732	0.996	17963	1	-6.41	8	-1.73	0.0421	706	0.975	0.958	17349	0.997
CAB39	-9.96	8	-2.67	0.00381	92	0.732	0.996	17962	1	-1.14	8	-0.26	0.397	7044	0.975	0.603	11011	0.977
HEATR2	-9.95	8	-2.67	0.00384	93	0.732	0.996	17961	1	-4.89	8	-1.3	0.0963	1580	0.975	0.904	16475	0.99
TLE6	-9.94	8	-2.66	0.00385	94	0.732	0.996	17960	1	-8.61	8	-2.34	0.0097	192	0.896	0.99	17863	1
CCR8	-9.94	8	-2.66	0.00385	95	0.732	0.996	17959	1	-5.62	8	-1.51	0.066	1118	0.975	0.934	16937	0.995
PLEKHO1	-9.9	8	-2.65	0.00398	96	0.742	0.996	17958	1	-3.93	8	-1.04	0.15	2485	0.975	0.85	15570	0.985
PAMR1	-9.9	8	-2.65	0.00399	97	0.742	0.996	17957	1	-5.07	8	-1.35	0.0878	1433	0.975	0.912	16622	0.991
TBKBP1	-9.87	8	-2.65	0.00408	98	0.748	0.996	17956	1	-3.92	8	-1.03	0.15	2497	0.975	0.85	15558	0.985
CTRB2	-9.85	8	-2.64	0.00416	99	0.748	0.996	17955	1	-5.98	8	-1.61	0.0539	900	0.975	0.946	17155	0.996
CS	-9.82	8	-2.63	0.00425	100	0.748	0.996	17954	1	-9.03	8	-2.46	0.00701	152	0.833	0.993	17903	1
ZNF587B	-8.51	6	-2.63	0.00425	101	0.748	0.996	17953	1	-8.4	6	-2.64	0.00412	99	0.751	0.996	17956	1
PRAF2	-9.82	8	-2.63	0.00427	102	0.748	0.996	17952	1	-9.07	8	-2.47	0.00683	149	0.824	0.993	17906	1
OR1B1	-9.81	8	-2.63	0.00429	103	0.748	0.996	17951	1	-3.32	8	-0.87	0.193	3207	0.975	0.807	14848	0.981
PRKAG1	-9.81	8	-2.63	0.00431	104	0.748	0.996	17950	1	-7.7	8	-2.09	0.0185	332	0.975	0.982	17723	1
OR4C6	-9.73	8	-2.61	0.00458	105	0.77	0.995	17949	1	-8.26	8	-2.24	0.0125	236	0.949	0.987	17819	1
GSK3B	-9.7	8	-2.6	0.00468	106	0.77	0.995	17948	1	-4.7	8	-1.25	0.105	1738	0.975	0.895	16317	0.989
UBN2	-9.7	8	-2.6	0.00469	107	0.77	0.995	17947	1	-8.15	8	-2.21	0.0135	256	0.949	0.986	17799	1
SPC25	-9.67	8	-2.59	0.0048	108	0.77	0.995	17946	1	-10.74	8	-2.93	0.00169	62	0.493	0.998	17993	1
PDCD2L	-9.65	8	-2.58	0.00487	109	0.77	0.995	17945	1	-6.39	8	-1.72	0.0425	716	0.975	0.957	17339	0.997
SDF2	-9.65	8	-2.58	0.00487	110	0.77	0.995	17944	1	-7.32	8	-1.98	0.0238	405	0.975	0.976	17650	0.998
MYO1D	-9.65	8	-2.58	0.00489	111	0.77	0.995	17943	1	-8.99	8	-2.45	0.00723	154	0.848	0.993	17901	1
UMPS	-9.65	8	-2.58	0.00491	112	0.77	0.995	17942	1	2.05	8	0.63	0.734	13579	0.975	0.266	4476	0.977
WDR26	-8.35	6	-2.58	0.00494	113	0.77	0.995	17941	1	-4.57	6	-1.41	0.0792	1301	0.975	0.921	16754	0.992
KTI12	-9.63	8	-2.58	0.00495	114	0.77	0.995	17940	1	-10.78	8	-2.94	0.00162	60	0.488	0.998	17995	1
GPHA2	-9.62	8	-2.58	0.00499	115	0.77	0.995	17939	1	-8.3	8	-2.25	0.0122	231	0.949	0.988	17824	1
DEFB118	-9.62	8	-2.58	0.00499	116	0.77	0.995	17938	1	-6.88	8	-1.86	0.0316	535	0.975	0.968	17520	0.998
TUSC2	-9.62	8	-2.57	0.00501	117	0.77	0.995	17937	1	-12.69	8	-3.47	0.000256	32	0.143	1	18023	1
SUMO1	-4.81	2	-2.57	0.00503	118	0.77	0.995	17936	1	-1.3	2	-0.66	0.253	4299	0.975	0.747	13756	0.979
XPA	-9.6	8	-2.57	0.0051	119	0.774	0.995	17935	1	-7.69	8	-2.08	0.0186	336	0.975	0.981	17719	1
C11orf31	-9.58	8	-2.56	0.00519	120	0.776	0.995	17934	1	-9.85	8	-2.68	0.00364	93	0.702	0.996	17962	1
C21orf33	-9.57	8	-2.56	0.0052	121	0.776	0.995	17933	1	-4.56	8	-1.21	0.113	1854	0.975	0.887	16201	0.989
GAS2	-9.55	8	-2.56	0.0053	122	0.784	0.995	17932	1	-8.64	8	-2.35	0.00949	188	0.896	0.991	17867	1
ALG6	-9.48	8	-2.54	0.0056	123	0.819	0.994	17931	1	-11.36	8	-3.1	0.000956	48	0.359	0.999	18007	1
NFIB	-9.47	8	-2.53	0.00562	124	0.819	0.994	17930	1	-6.21	8	-1.67	0.0472	802	0.975	0.953	17253	0.996
CLCNKA	-9.44	8	-2.53	0.00577	125	0.83	0.994	17929	1	-9.33	8	-2.54	0.00556	120	0.818	0.994	17935	1
SYAP1	-9.43	8	-2.52	0.00582	126	0.83	0.994	17928	1	-8.39	8	-2.28	0.0113	222	0.92	0.989	17833	1
MYL6	-9.42	8	-2.52	0.00585	127	0.83	0.994	17927	1	-10.34	8	-2.82	0.00241	75	0.58	0.998	17980	1
CCDC81	-9.41	8	-2.52	0.00592	128	0.83	0.994	17926	1	-5.86	8	-1.57	0.0577	958	0.975	0.942	17097	0.995
NPC2	-9.39	8	-2.51	0.006	129	0.83	0.994	17925	1	-8.17	8	-2.22	0.0133	252	0.949	0.987	17803	1
OR5B3	-8.78	7	-2.51	0.00602	130	0.83	0.994	17924	1	-7.35	7	-2.13	0.0166	297	0.975	0.983	17758	1
CCDC88A	-9.38	8	-2.51	0.00607	131	0.83	0.994	17923	1	-3.67	8	-0.97	0.167	2795	0.975	0.833	15260	0.985
POLR2D	-8.11	6	-2.51	0.0061	132	0.83	0.994	17922	1	-3.56	7	-1	0.158	2625	0.975	0.842	15430	0.985
CHCHD4	-9.37	8	-2.51	0.00611	133	0.83	0.994	17921	1	-10.01	8	-2.73	0.00317	86	0.666	0.997	17969	1
OC90	-9.36	8	-2.5	0.00617	134	0.83	0.994	17920	1	-4.76	8	-1.27	0.102	1679	0.975	0.898	16376	0.99
DPP9	-9.35	8	-2.5	0.00621	135	0.83	0.994	17919	1	-9.17	8	-2.49	0.00632	138	0.824	0.994	17917	1
ARHGAP4	-9.33	8	-2.5	0.00628	136	0.833	0.994	17918	1	-8.48	8	-2.3	0.0106	210	0.91	0.989	17845	1
POP7	-9.3	8	-2.49	0.00642	137	0.841	0.994	17917	1	-4.98	8	-1.33	0.0918	1502	0.975	0.908	16553	0.991
HIST1H3B	-6.57	4	-2.48	0.00651	138	0.841	0.993	17916	1	-3.84	4	-1.45	0.0729	1211	0.975	0.927	16844	0.993
DPH6	-9.27	8	-2.48	0.00658	139	0.841	0.993	17915	1	-4.62	8	-1.23	0.109	1803	0.975	0.891	16252	0.989
CASP5	-9.26	8	-2.48	0.00662	140	0.841	0.993	17914	1	-6.65	8	-1.79	0.0364	612	0.975	0.964	17443	0.997
FUT3	-9.26	8	-2.48	0.00664	141	0.841	0.993	17913	1	-4.73	8	-1.26	0.104	1701	0.975	0.896	16354	0.989
SYT8	-9.26	8	-2.48	0.00665	142	0.841	0.993	17912	1	-8.91	8	-2.42	0.00772	161	0.866	0.992	17894	1
MYH8	-9.25	8	-2.47	0.00668	143	0.841	0.993	17911	1	-7.42	8	-2.01	0.0224	382	0.975	0.978	17673	0.999
EIF2B3	-9.25	8	-2.47	0.00672	144	0.841	0.993	17910	1	-7	8	-1.89	0.0294	504	0.975	0.971	17551	0.998
CEP68	-9.23	8	-2.47	0.00682	145	0.841	0.993	17909	1	-6.15	8	-1.65	0.0491	830	0.975	0.951	17225	0.996
SNRPN	-9.22	8	-2.46	0.00688	146	0.841	0.993	17908	1	-9.21	8	-2.51	0.00612	133	0.824	0.994	17922	1
OR9Q1	-9.21	8	-2.46	0.0069	147	0.841	0.993	17907	1	-7.68	8	-2.08	0.0188	338	0.975	0.981	17717	1
DGAT2L6	-9.21	8	-2.46	0.0069	148	0.841	0.993	17906	1	-5.63	8	-1.51	0.0654	1107	0.975	0.935	16948	0.995
MYRF	-9.19	8	-2.46	0.007	149	0.846	0.993	17905	1	-6.56	8	-1.77	0.0386	643	0.975	0.961	17412	0.997
NFRKB	-9.18	8	-2.45	0.00705	150	0.846	0.993	17904	1	-8.43	8	-2.29	0.0111	219	0.913	0.989	17836	1
DNA2	-9.17	8	-2.45	0.00713	151	0.846	0.993	17903	1	-2.79	8	-0.72	0.236	3981	0.975	0.764	14074	0.98
C1QL2	-9.16	8	-2.45	0.00718	152	0.846	0.993	17902	1	-4.11	8	-1.09	0.138	2296	0.975	0.862	15759	0.987
TJP2	-9.16	8	-2.45	0.0072	153	0.846	0.993	17901	1	-4.76	8	-1.27	0.102	1681	0.975	0.898	16374	0.99
NRN1L	-9.15	8	-2.45	0.00722	154	0.846	0.993	17900	1	-6.31	8	-1.7	0.0447	748	0.975	0.955	17307	0.996
IYD	-9.13	8	-2.44	0.00734	155	0.855	0.993	17899	1	-7.31	8	-1.98	0.0241	413	0.975	0.976	17642	0.998
CTD-2368P22.1	-9.12	8	-2.44	0.00742	156	0.856	0.993	17898	1	-7.27	8	-1.96	0.0247	419	0.975	0.975	17636	0.998
MEX3B	-9.11	8	-2.43	0.00747	157	0.856	0.993	17897	1	-7.81	8	-2.12	0.0172	310	0.975	0.983	17745	1
SRP68	-9.1	8	-2.43	0.00749	158	0.856	0.993	17896	1	-5.05	8	-1.35	0.0886	1454	0.975	0.911	16601	0.991
VPS13A	-9.09	8	-2.43	0.00759	159	0.857	0.992	17895	1	-9.53	8	-2.59	0.00473	107	0.798	0.995	17948	1
GDPD3	-9.07	8	-2.42	0.00771	160	0.857	0.992	17894	1	-5.25	8	-1.41	0.08	1309	0.975	0.92	16746	0.992
DUT	-9.06	8	-2.42	0.00774	161	0.857	0.992	17893	1	-2.51	8	-0.64	0.26	4413	0.975	0.74	13642	0.979
DGKH	-9.05	8	-2.42	0.00781	162	0.857	0.992	17892	1	-5.27	8	-1.41	0.0793	1304	0.975	0.921	16751	0.992
INADL	-9.05	8	-2.42	0.00781	163	0.857	0.992	17891	1	-6.71	8	-1.81	0.035	590	0.975	0.965	17465	0.997
TMUB1	-9.05	8	-2.42	0.00784	164	0.857	0.992	17890	1	-9.38	8	-2.55	0.00533	114	0.818	0.995	17941	1
MAGEB16	-9.05	8	-2.42	0.00784	165	0.857	0.992	17889	1	-5.87	8	-1.58	0.0573	951	0.975	0.943	17104	0.995
KCNC1	-9.02	8	-2.41	0.00796	166	0.862	0.992	17888	1	-8.22	8	-2.23	0.0129	241	0.949	0.987	17814	1
CNOT11	-9.02	8	-2.41	0.00798	167	0.862	0.992	17887	1	-11.3	8	-3.09	0.00101	50	0.359	0.999	18005	1
SPACA3	-8.99	8	-2.4	0.00815	168	0.869	0.992	17886	1	-11.51	8	-3.15	0.00083	46	0.326	0.999	18009	1
MGEA5	-8.99	8	-2.4	0.00817	169	0.869	0.992	17885	1	-5.02	8	-1.34	0.0901	1478	0.975	0.91	16577	0.991
IKBKG	-8.99	8	-2.4	0.00819	170	0.869	0.992	17884	1	-8.74	8	-2.37	0.0088	176	0.886	0.991	17879	1
DUSP7	-8.98	8	-2.4	0.00824	171	0.87	0.992	17883	1	-5.39	8	-1.44	0.0746	1232	0.975	0.925	16823	0.993
PNKD	-8.97	8	-2.4	0.00829	172	0.87	0.992	17882	1	-7.81	8	-2.11	0.0172	311	0.975	0.983	17744	1
AOAH	-8.93	8	-2.38	0.00857	173	0.891	0.991	17881	1	-3.22	8	-0.84	0.201	3348	0.975	0.799	14707	0.981
PITPNM1	-8.92	8	-2.38	0.00859	174	0.891	0.991	17880	1	-8.96	8	-2.44	0.00745	158	0.851	0.993	17897	1
MAP3K13	-8.9	8	-2.38	0.00872	175	0.897	0.991	17879	1	-5.27	8	-1.41	0.0792	1300	0.975	0.921	16755	0.992
CEBPA	-8.9	8	-2.38	0.00875	176	0.897	0.991	17878	1	-10.69	8	-2.92	0.00176	63	0.494	0.998	17992	1
HRAS	-8.89	8	-2.37	0.0088	177	0.897	0.991	17877	1	-4.95	8	-1.32	0.0933	1528	0.975	0.907	16527	0.99
EIF2S1	-8.85	8	-2.36	0.00908	178	0.899	0.991	17876	1	-3.83	8	-1.01	0.157	2605	0.975	0.843	15450	0.985
EXOSC3	-8.85	8	-2.36	0.00908	179	0.899	0.991	17875	1	-6.66	8	-1.8	0.0363	609	0.975	0.964	17446	0.997
DLAT	-8.84	8	-2.36	0.00912	180	0.899	0.991	17874	1	-8.76	8	-2.38	0.00866	174	0.886	0.991	17881	1
SLC26A10	-8.84	8	-2.36	0.00915	181	0.899	0.991	17873	1	-8.22	8	-2.23	0.0129	243	0.949	0.987	17812	1
MAS1	-8.82	8	-2.35	0.00927	182	0.899	0.991	17872	1	-4.14	8	-1.1	0.136	2261	0.975	0.864	15794	0.987
ELF5	-8.82	8	-2.35	0.00928	183	0.899	0.991	17871	1	-7.71	8	-2.09	0.0184	330	0.975	0.982	17725	1
CEP104	-8.81	8	-2.35	0.00935	184	0.899	0.991	17870	1	-7.36	8	-1.99	0.0232	394	0.975	0.977	17661	0.998
NAP1L3	-8.8	8	-2.35	0.00943	185	0.899	0.991	17869	1	-4.46	8	-1.19	0.118	1945	0.975	0.882	16110	0.988
SMPD2	-8.8	8	-2.35	0.00943	186	0.899	0.991	17868	1	-7.06	8	-1.91	0.0282	483	0.975	0.972	17572	0.998
SCGB2B2	-8.79	8	-2.35	0.0095	187	0.899	0.991	17867	1	-7.8	8	-2.11	0.0173	313	0.975	0.983	17742	1
INTS12	-8.78	8	-2.34	0.00955	188	0.899	0.99	17866	1	-4.93	8	-1.32	0.094	1548	0.975	0.906	16507	0.99
EFHC1	-8.78	8	-2.34	0.00955	189	0.899	0.99	17865	1	-6.39	8	-1.72	0.0426	719	0.975	0.957	17336	0.997
PHLDB1	-8.78	8	-2.34	0.00957	190	0.899	0.99	17864	1	-6.77	8	-1.83	0.0339	569	0.975	0.966	17486	0.997
OR10G7	-8.77	8	-2.34	0.0096	191	0.899	0.99	17863	1	-6.29	8	-1.69	0.0452	758	0.975	0.955	17297	0.996
PAPD7	-8.77	8	-2.34	0.00962	192	0.899	0.99	17862	1	-11.37	8	-3.11	0.000943	47	0.359	0.999	18008	1
CANT1	-8.76	8	-2.34	0.00967	193	0.899	0.99	17861	1	-7.42	8	-2.01	0.0224	381	0.975	0.978	17674	0.999
MEMO1	-8.76	8	-2.34	0.00972	194	0.899	0.99	17860	1	-11.32	8	-3.09	0.000993	49	0.359	0.999	18006	1
CNOT4	-8.75	8	-2.34	0.00975	195	0.899	0.99	17859	1	-6.04	8	-1.62	0.0523	888	0.975	0.948	17167	0.996
AGTR1	-8.75	8	-2.34	0.00976	196	0.899	0.99	17858	1	-6.39	8	-1.72	0.0425	718	0.975	0.957	17337	0.997
FIBIN	-8.74	8	-2.33	0.00988	197	0.901	0.99	17857	1	-4.78	8	-1.27	0.101	1661	0.975	0.899	16394	0.99
CRYGS	-8.74	8	-2.33	0.00989	198	0.901	0.99	17856	1	-8.51	8	-2.31	0.0104	205	0.91	0.99	17850	1
EFCAB4A	-8.71	8	-2.33	0.01	199	0.907	0.99	17855	1	-6.52	8	-1.76	0.0395	659	0.975	0.961	17396	0.997
TMEM134	-8.69	8	-2.32	0.0103	200	0.907	0.99	17854	1	-3.7	8	-0.97	0.165	2755	0.975	0.835	15300	0.985
OR5D13	-8.68	8	-2.32	0.0103	201	0.907	0.99	17853	1	-5.95	8	-1.6	0.055	917	0.975	0.945	17138	0.995
RCE1	-8.68	8	-2.31	0.0103	202	0.907	0.99	17852	1	-12	8	-3.28	0.000519	40	0.23	0.999	18015	1
FAM173B	-8.67	8	-2.31	0.0104	203	0.907	0.99	17851	1	-6.37	8	-1.71	0.0432	730	0.975	0.957	17325	0.997
POLA1	-8.67	8	-2.31	0.0104	204	0.907	0.99	17850	1	-6.2	8	-1.67	0.0475	803	0.975	0.952	17252	0.996
TOLLIP	-8.65	8	-2.31	0.0105	205	0.907	0.99	17849	1	-6.46	8	-1.74	0.0409	684	0.975	0.959	17371	0.997
KLF7	-8.65	8	-2.31	0.0105	206	0.907	0.989	17848	1	-8.72	8	-2.37	0.0089	180	0.886	0.991	17875	1
OR5B21	-8.65	8	-2.31	0.0106	207	0.907	0.989	17847	1	-6.05	8	-1.63	0.052	882	0.975	0.948	17173	0.996
ENGASE	-8.64	8	-2.3	0.0106	208	0.907	0.989	17846	1	-4.18	8	-1.11	0.134	2221	0.975	0.866	15834	0.987
TMIGD1	-8.64	8	-2.3	0.0106	209	0.907	0.989	17845	1	-9.88	8	-2.69	0.00356	90	0.702	0.996	17965	1
PHF14	-8.64	8	-2.3	0.0106	210	0.907	0.989	17844	1	-8.46	8	-2.3	0.0108	214	0.912	0.989	17841	1
TOM1	-8.64	8	-2.3	0.0106	211	0.907	0.989	17843	1	-3.65	8	-0.96	0.169	2833	0.975	0.831	15222	0.985
OR51A7	-8.63	8	-2.3	0.0106	212	0.907	0.989	17842	1	-7.71	8	-2.09	0.0184	331	0.975	0.982	17724	1
SLC25A1	-8.61	8	-2.3	0.0108	213	0.914	0.989	17841	1	-5.09	8	-1.36	0.0872	1422	0.975	0.913	16633	0.991
PTPRM	-8.61	8	-2.3	0.0108	214	0.914	0.989	17840	1	-7.67	8	-2.08	0.0189	341	0.975	0.981	17714	1
UEVLD	-8.59	8	-2.29	0.011	215	0.921	0.989	17839	1	-6.26	8	-1.69	0.0459	775	0.975	0.954	17280	0.996
FREM2	-8.59	8	-2.29	0.011	216	0.922	0.989	17838	1	-6.29	8	-1.69	0.0451	757	0.975	0.955	17298	0.996
FXN	-7.41	6	-2.28	0.0113	217	0.932	0.989	17837	1	-4.61	8	-1.23	0.11	1815	0.975	0.89	16240	0.989
PIEZO1	-8.55	8	-2.28	0.0113	218	0.932	0.989	17836	1	-4.54	8	-1.21	0.114	1866	0.975	0.886	16189	0.989
EIF3H	-8.55	8	-2.28	0.0113	219	0.932	0.989	17835	1	-9.73	8	-2.65	0.00403	98	0.742	0.996	17957	1
NOV	-8.54	8	-2.28	0.0114	220	0.932	0.989	17834	1	-5.08	8	-1.36	0.0875	1428	0.975	0.913	16627	0.991
TRPM1	-8.53	8	-2.27	0.0115	221	0.932	0.989	17833	1	-5.82	8	-1.56	0.0592	985	0.975	0.941	17070	0.995
C9orf43	-8.53	8	-2.27	0.0115	222	0.932	0.989	17832	1	-4.48	8	-1.19	0.117	1930	0.975	0.883	16125	0.988
GIGYF2	-8.53	8	-2.27	0.0115	223	0.932	0.988	17831	1	-7.89	8	-2.14	0.0163	292	0.975	0.984	17763	1
SHH	-8.52	8	-2.27	0.0116	224	0.932	0.988	17830	1	-6.94	8	-1.87	0.0305	520	0.975	0.969	17535	0.998
SMIM6	-8.51	8	-2.27	0.0116	225	0.932	0.988	17829	1	-5.77	8	-1.55	0.0606	1015	0.975	0.939	17040	0.995
GIMAP2	-8.49	8	-2.26	0.0118	226	0.941	0.988	17828	1	-6.99	8	-1.89	0.0296	507	0.975	0.97	17548	0.998
AKAP7	-8.49	8	-2.26	0.0118	227	0.941	0.988	17827	1	-3.23	8	-0.84	0.2	3330	0.975	0.8	14725	0.981
EMP3	-8.47	8	-2.26	0.012	228	0.944	0.988	17826	1	-7.13	8	-1.93	0.0269	457	0.975	0.973	17598	0.998
MPEG1	-8.46	8	-2.25	0.0121	229	0.944	0.988	17825	1	-10.42	8	-2.84	0.00223	74	0.545	0.998	17981	1
DUS3L	-8.46	8	-2.25	0.0121	230	0.944	0.988	17824	1	-3.92	8	-1.03	0.151	2504	0.975	0.849	15551	0.985
ABTB2	-8.45	8	-2.25	0.0121	231	0.944	0.988	17823	1	-5.75	8	-1.54	0.0614	1027	0.975	0.939	17028	0.995
INIP	-8.45	8	-2.25	0.0121	232	0.944	0.988	17822	1	-8.13	8	-2.21	0.0137	260	0.951	0.986	17795	1
CAV3	-8.44	8	-2.25	0.0122	233	0.944	0.988	17821	1	-4.1	8	-1.08	0.139	2314	0.975	0.861	15741	0.987
MYO7A	-8.43	8	-2.25	0.0124	234	0.944	0.988	17820	1	-8.49	8	-2.3	0.0106	209	0.91	0.989	17846	1
FOPNL	-8.42	8	-2.24	0.0124	235	0.944	0.988	17819	1	-4.21	8	-1.11	0.133	2189	0.975	0.867	15866	0.987
MYADML2	-8.41	8	-2.24	0.0125	236	0.944	0.988	17818	1	-5.93	8	-1.59	0.0554	925	0.975	0.945	17130	0.995
HRASLS2	-8.4	8	-2.24	0.0126	237	0.944	0.987	17817	1	-7.8	8	-2.11	0.0172	312	0.975	0.983	17743	1
ZNF180	-8.4	8	-2.24	0.0126	238	0.944	0.987	17816	1	-6.27	8	-1.69	0.0458	771	0.975	0.954	17284	0.996
UBXN1	-8.39	8	-2.24	0.0127	239	0.944	0.987	17815	1	-5.07	8	-1.35	0.088	1441	0.975	0.912	16614	0.991
THAP11	-8.39	8	-2.24	0.0127	240	0.944	0.987	17814	1	-8.88	8	-2.41	0.00787	162	0.874	0.992	17893	1
IPO7	-7.27	6	-2.24	0.0127	241	0.944	0.987	17813	1	-6.12	8	-1.65	0.05	847	0.975	0.95	17208	0.996
ZNF512B	-8.39	8	-2.24	0.0127	242	0.944	0.987	17812	1	-2.85	8	-0.74	0.23	3883	0.975	0.77	14172	0.98
PRKRIR	-7.25	6	-2.23	0.0129	243	0.944	0.987	17811	1	-6.23	6	-1.94	0.026	444	0.975	0.974	17611	0.998
KLK1	-8.37	8	-2.23	0.0129	244	0.944	0.987	17810	1	-9.33	8	-2.54	0.00557	121	0.818	0.994	17934	1
PAFAH2	-8.36	8	-2.23	0.013	245	0.944	0.987	17809	1	-5.65	8	-1.52	0.0647	1092	0.975	0.935	16963	0.995
ATG13	-8.36	8	-2.23	0.013	246	0.944	0.987	17808	1	-5.85	8	-1.57	0.058	965	0.975	0.942	17090	0.995
SNAP29	-8.35	8	-2.22	0.0131	247	0.944	0.987	17807	1	-7.14	8	-1.93	0.0268	454	0.975	0.973	17601	0.998
POLR3K	-8.35	8	-2.22	0.0131	248	0.944	0.987	17806	1	-5.19	8	-1.39	0.0826	1349	0.975	0.917	16706	0.991
PFKFB3	-8.35	8	-2.22	0.0131	249	0.944	0.987	17805	1	-6.21	8	-1.67	0.0472	801	0.975	0.953	17254	0.996
OGFRL1	-8.33	8	-2.22	0.0133	250	0.944	0.987	17804	1	-2.12	8	-0.53	0.297	5078	0.975	0.703	12977	0.978
ZNF285	-8.33	8	-2.22	0.0133	251	0.944	0.987	17803	1	-10.75	8	-2.93	0.00167	61	0.493	0.998	17994	1
OR10G8	-8.33	8	-2.22	0.0133	252	0.944	0.987	17802	1	-6.22	8	-1.67	0.0472	800	0.975	0.953	17255	0.996
CTNNA3	-8.32	8	-2.22	0.0133	253	0.944	0.987	17801	1	0.34	8	0.15	0.56	10203	0.975	0.44	7852	0.977
C6orf47	-8.32	8	-2.22	0.0133	254	0.944	0.987	17800	1	-4.85	8	-1.29	0.098	1612	0.975	0.902	16443	0.99
ROCK2	-8.32	8	-2.22	0.0134	255	0.944	0.987	17799	1	-7.32	8	-1.98	0.0239	407	0.975	0.976	17648	0.998
DIRAS1	-8.3	8	-2.21	0.0136	256	0.944	0.986	17798	1	-5.67	8	-1.52	0.0643	1079	0.975	0.936	16976	0.995
SGOL1	-8.29	8	-2.21	0.0136	257	0.944	0.986	17797	1	-6.51	8	-1.76	0.0396	663	0.975	0.96	17392	0.997
GSPT1	-8.27	8	-2.2	0.0138	258	0.944	0.986	17796	1	-12.95	8	-3.55	0.000195	31	0.113	1	18024	1
SLC26A6	-8.25	8	-2.2	0.014	259	0.944	0.986	17795	1	-3.38	8	-0.88	0.189	3144	0.975	0.811	14911	0.982
GNPDA2	-8.25	8	-2.2	0.0141	260	0.944	0.986	17794	1	-10.04	8	-2.74	0.0031	85	0.657	0.997	17970	1
DSE	-8.24	8	-2.19	0.0141	261	0.944	0.986	17793	1	-8.14	8	-2.21	0.0137	259	0.951	0.986	17796	1
MUC15	-8.24	8	-2.19	0.0141	262	0.944	0.986	17792	1	-4.86	8	-1.3	0.0976	1603	0.975	0.902	16452	0.99
B3GNT1	-8.24	8	-2.19	0.0141	263	0.944	0.986	17791	1	-7.74	8	-2.1	0.018	321	0.975	0.982	17734	1
H3F3B	-5.82	4	-2.19	0.0142	264	0.944	0.986	17790	1	-7.65	4	-2.95	0.00158	58	0.488	0.998	17997	1
COX14	-8.23	8	-2.19	0.0142	265	0.944	0.986	17789	1	-8.17	8	-2.22	0.0133	254	0.949	0.987	17801	1
RBM5	-8.22	8	-2.19	0.0144	266	0.944	0.986	17788	1	-9.51	8	-2.59	0.00483	108	0.8	0.995	17947	1
RPS6KA3	-8.2	8	-2.18	0.0145	267	0.944	0.986	17787	1	-12.99	8	-3.56	0.000188	28	0.113	1	18027	1
OPRK1	-8.2	8	-2.18	0.0145	268	0.944	0.985	17786	1	-6.52	8	-1.76	0.0395	661	0.975	0.96	17394	0.997
TRANK1	-8.19	8	-2.18	0.0146	269	0.944	0.985	17785	1	-5.53	8	-1.48	0.069	1150	0.975	0.931	16905	0.994
MKI67	-8.18	8	-2.18	0.0147	270	0.944	0.985	17784	1	-5.32	8	-1.42	0.0771	1269	0.975	0.923	16786	0.993
CITED2	-8.17	8	-2.18	0.0148	271	0.944	0.985	17783	1	-6.09	8	-1.64	0.0508	862	0.975	0.949	17193	0.996
NDUFA5	-8.17	8	-2.17	0.0149	272	0.944	0.985	17782	1	-6.37	8	-1.72	0.0432	728	0.975	0.957	17327	0.997
QTRTD1	-8.17	8	-2.17	0.0149	273	0.944	0.985	17781	1	-6.74	8	-1.82	0.0346	581	0.975	0.965	17474	0.997
SLC27A4	-8.16	8	-2.17	0.0149	274	0.944	0.985	17780	1	-3.34	8	-0.87	0.192	3199	0.975	0.808	14856	0.982
MYO6	-8.16	8	-2.17	0.0149	275	0.944	0.985	17779	1	-7.33	8	-1.98	0.0237	401	0.975	0.976	17654	0.998
MRGPRX2	-8.16	8	-2.17	0.015	276	0.944	0.985	17778	1	-7.33	8	-1.98	0.0237	402	0.975	0.976	17653	0.998
GPR155	-8.16	8	-2.17	0.015	277	0.944	0.985	17777	1	-8.34	8	-2.26	0.0118	229	0.929	0.988	17826	1
DCD	-8.15	8	-2.17	0.015	278	0.944	0.985	17776	1	-5.62	8	-1.51	0.0658	1116	0.975	0.934	16939	0.995
C3orf17	-8.15	8	-2.17	0.015	279	0.944	0.985	17775	1	-7.1	8	-1.92	0.0274	467	0.975	0.973	17588	0.998
PRPF4B	-8.14	8	-2.17	0.0151	280	0.944	0.985	17774	1	-6.62	8	-1.78	0.0372	626	0.975	0.963	17429	0.997
ORM1	-7.04	6	-2.16	0.0153	281	0.944	0.985	17773	1	-4.07	6	-1.25	0.105	1736	0.975	0.895	16319	0.989
SERPINB1	-8.12	8	-2.16	0.0153	282	0.944	0.985	17772	1	-7.03	8	-1.9	0.0287	491	0.975	0.971	17564	0.998
PGBD2	-8.12	8	-2.16	0.0153	283	0.944	0.985	17771	1	-6.17	8	-1.66	0.0484	819	0.975	0.952	17236	0.996
FADD	-8.11	8	-2.16	0.0154	284	0.944	0.985	17770	1	-6.39	8	-1.72	0.0426	723	0.975	0.957	17332	0.997
MAP2K6	-8.11	8	-2.16	0.0155	285	0.944	0.985	17769	1	-4.3	8	-1.14	0.127	2100	0.975	0.873	15955	0.988
SCGB2A1	-7.02	6	-2.16	0.0155	286	0.944	0.985	17768	1	-3.72	6	-1.14	0.127	2107	0.975	0.873	15948	0.988
PALB2	-8.11	8	-2.16	0.0155	287	0.944	0.985	17767	1	-4.6	8	-1.22	0.111	1823	0.975	0.889	16232	0.989
FAM21B	-4.05	2	-2.16	0.0155	288	0.944	0.984	17766	1	-1.97	2	-1.04	0.149	2469	0.975	0.851	15586	0.985
RAB20	-8.1	8	-2.16	0.0155	289	0.944	0.984	17765	1	-5.68	8	-1.52	0.0639	1073	0.975	0.936	16982	0.995
METTL7B	-8.08	8	-2.15	0.0158	290	0.944	0.984	17764	1	-3.36	8	-0.88	0.19	3172	0.975	0.81	14883	0.982
METAP1D	-8.07	8	-2.15	0.0159	291	0.944	0.984	17763	1	-3.71	8	-0.98	0.165	2750	0.975	0.835	15305	0.985
ANGPTL5	-8.07	8	-2.15	0.0159	292	0.944	0.984	17762	1	-6.18	8	-1.66	0.0481	814	0.975	0.952	17241	0.996
TRIM5	-8.07	8	-2.15	0.0159	293	0.944	0.984	17761	1	-7.98	8	-2.16	0.0153	278	0.975	0.985	17777	1
FUK	-8.07	8	-2.15	0.0159	294	0.944	0.984	17760	1	-3.17	8	-0.83	0.205	3423	0.975	0.795	14632	0.981
CADM2	-8.06	8	-2.14	0.016	295	0.944	0.984	17759	1	-5.64	8	-1.51	0.0652	1104	0.975	0.935	16951	0.995
SYTL3	-8.06	8	-2.14	0.016	296	0.944	0.984	17758	1	-6.12	8	-1.65	0.05	849	0.975	0.95	17206	0.996
ATP11C	-8.06	8	-2.14	0.016	297	0.944	0.984	17757	1	-8.73	8	-2.37	0.00885	178	0.886	0.991	17877	1
KDELC2	-8.06	8	-2.14	0.016	298	0.944	0.984	17756	1	-6.28	8	-1.69	0.0453	759	0.975	0.955	17296	0.996
TMPRSS13	-8.05	8	-2.14	0.0161	299	0.944	0.984	17755	1	-5.86	8	-1.57	0.0578	962	0.975	0.942	17093	0.995
NYAP2	-8.05	8	-2.14	0.0162	300	0.944	0.984	17754	1	-4.06	8	-1.07	0.142	2350	0.975	0.858	15705	0.987
ZNF529	-8.04	8	-2.14	0.0163	301	0.944	0.984	17753	1	-7.7	8	-2.08	0.0185	334	0.975	0.981	17721	1
COL2A1	-8.03	8	-2.14	0.0163	302	0.944	0.984	17752	1	-2.69	8	-0.69	0.245	4138	0.975	0.755	13917	0.98
CECR6	-8.03	8	-2.14	0.0163	303	0.944	0.984	17751	1	-4.95	8	-1.32	0.0934	1532	0.975	0.907	16523	0.99
YWHAQ	-8.02	8	-2.13	0.0164	304	0.944	0.984	17750	1	-7.22	8	-1.95	0.0255	436	0.975	0.974	17619	0.998
HOXB6	-8.02	8	-2.13	0.0165	305	0.944	0.984	17749	1	-4.24	8	-1.12	0.13	2154	0.975	0.87	15901	0.987
PCDHA8	-8.02	8	-2.13	0.0165	306	0.944	0.984	17748	1	-5.93	8	-1.59	0.0555	928	0.975	0.944	17127	0.995
C22orf24	-8.01	8	-2.13	0.0166	307	0.944	0.983	17747	1	-7.74	8	-2.1	0.018	322	0.975	0.982	17733	1
luciferase	-19.6	48	-2.13	0.0167	308	0.944	0.983	17746	1	-19.97	48	-2.21	0.0135	255	0.949	0.987	17800	1
TMED3	-8	8	-2.13	0.0167	309	0.944	0.983	17745	1	-5.71	8	-1.53	0.0626	1050	0.975	0.937	17005	0.995
TWIST1	-8	8	-2.13	0.0167	310	0.944	0.983	17744	1	-6.69	8	-1.8	0.0356	598	0.975	0.964	17457	0.997
KRTAP17-1	-7.99	8	-2.13	0.0168	311	0.944	0.983	17743	1	-6.7	8	-1.81	0.0354	595	0.975	0.965	17460	0.997
LIN7C	-7.99	8	-2.13	0.0168	312	0.944	0.983	17742	1	-7.98	8	-2.16	0.0153	277	0.975	0.985	17778	1
FOXP2	-7.99	8	-2.13	0.0168	313	0.944	0.983	17741	1	-5.54	8	-1.48	0.0689	1149	0.975	0.931	16906	0.994
PYGB	-7.99	8	-2.12	0.0168	314	0.944	0.983	17740	1	-1.93	8	-0.48	0.316	5424	0.975	0.684	12631	0.977
ATG14	-7.99	8	-2.12	0.0169	315	0.944	0.983	17739	1	-7.1	8	-1.92	0.0275	468	0.975	0.973	17587	0.998
MYH11	-7.98	8	-2.12	0.0169	316	0.944	0.983	17738	1	-8.43	8	-2.29	0.0111	218	0.913	0.989	17837	1
HOXD10	-7.98	8	-2.12	0.017	317	0.944	0.983	17737	1	0.66	8	0.24	0.595	10888	0.975	0.405	7167	0.977
TNFRSF9	-7.97	8	-2.12	0.017	318	0.944	0.983	17736	1	-2.2	8	-0.56	0.289	4930	0.975	0.711	13125	0.978
SLC30A2	-7.97	8	-2.12	0.0171	319	0.944	0.983	17735	1	-5.47	8	-1.47	0.0714	1178	0.975	0.929	16877	0.993
LSM4	-7.96	8	-2.12	0.0172	320	0.944	0.983	17734	1	-2.3	8	-0.58	0.28	4767	0.975	0.72	13288	0.978
ETV1	-7.95	8	-2.11	0.0172	321	0.944	0.983	17733	1	-4.22	8	-1.12	0.132	2170	0.975	0.868	15885	0.987
OR8D1	-7.95	8	-2.11	0.0172	322	0.944	0.983	17732	1	-3.83	8	-1.01	0.156	2592	0.975	0.844	15463	0.985
C3orf55	-7.95	8	-2.11	0.0173	323	0.944	0.983	17731	1	-7.98	8	-2.16	0.0153	279	0.975	0.985	17776	1
SNRPD2	-5.62	4	-2.11	0.0173	324	0.944	0.983	17730	1	0.19	6	0.12	0.547	9944	0.975	0.453	8111	0.977
OR4C46	-7.95	8	-2.11	0.0173	325	0.944	0.983	17729	1	-6.46	8	-1.74	0.0408	682	0.975	0.959	17373	0.997
ZFPM2	-7.94	8	-2.11	0.0174	326	0.944	0.983	17728	1	-6.73	8	-1.82	0.0347	584	0.975	0.965	17471	0.997
ZNF423	-7.94	8	-2.11	0.0174	327	0.944	0.983	17727	1	-7.35	8	-1.99	0.0234	395	0.975	0.977	17660	0.998
NCAPH	-7.93	8	-2.11	0.0175	328	0.944	0.983	17726	1	-9.17	8	-2.5	0.00629	137	0.824	0.994	17918	1
PUS3	-7.93	8	-2.11	0.0175	329	0.944	0.983	17725	1	-6.4	8	-1.72	0.0423	711	0.975	0.958	17344	0.997
IL9	-7.93	8	-2.11	0.0175	330	0.944	0.982	17724	1	-5.5	8	-1.47	0.0704	1166	0.975	0.93	16889	0.994
BBS10	-7.92	8	-2.11	0.0176	331	0.944	0.982	17723	1	-2.15	8	-0.54	0.294	5011	0.975	0.706	13044	0.978
OR52R1	-7.91	8	-2.1	0.0177	332	0.944	0.982	17722	1	-5.09	8	-1.36	0.0871	1421	0.975	0.913	16634	0.991
WT1	-7.91	8	-2.1	0.0177	333	0.944	0.982	17721	1	-8.58	8	-2.33	0.00987	198	0.9	0.99	17857	1
PPP4C	-7.91	8	-2.1	0.0177	334	0.944	0.982	17720	1	-4.47	8	-1.19	0.118	1937	0.975	0.882	16118	0.988
KCTD15	-7.91	8	-2.1	0.0178	335	0.944	0.982	17719	1	-5.47	8	-1.47	0.0714	1179	0.975	0.929	16876	0.993
SERGEF	-7.91	8	-2.1	0.0178	336	0.944	0.982	17718	1	-9.93	8	-2.71	0.0034	88	0.698	0.997	17967	1
MCM2	-7.89	8	-2.1	0.0179	337	0.944	0.982	17717	1	-9.39	8	-2.56	0.0053	113	0.818	0.995	17942	1
NRGN	-7.89	8	-2.1	0.0179	338	0.944	0.982	17716	1	-5.7	8	-1.53	0.0632	1059	0.975	0.937	16996	0.995
STX2	-7.89	8	-2.1	0.018	339	0.944	0.982	17715	1	-4.05	8	-1.07	0.142	2365	0.975	0.858	15690	0.986
TAT	-6.83	6	-2.1	0.0181	340	0.944	0.982	17714	1	-5.65	6	-1.76	0.0393	654	0.975	0.961	17401	0.997
INSL6	-7.88	8	-2.1	0.0181	341	0.944	0.982	17713	1	-3.1	8	-0.81	0.21	3527	0.975	0.79	14528	0.981
LRRC72	-7.88	8	-2.09	0.0181	342	0.944	0.982	17712	1	-5.21	8	-1.39	0.0817	1337	0.975	0.918	16718	0.992
LENG9	-7.88	8	-2.09	0.0181	343	0.944	0.982	17711	1	-6.72	8	-1.81	0.035	588	0.975	0.965	17467	0.997
DBNDD1	-7.88	8	-2.09	0.0181	344	0.944	0.982	17710	1	-6.56	8	-1.77	0.0384	639	0.975	0.962	17416	0.997
HRASLS	-7.87	8	-2.09	0.0182	345	0.944	0.982	17709	1	-6.88	8	-1.86	0.0316	536	0.975	0.968	17519	0.998
SRPRB	-7.87	8	-2.09	0.0182	346	0.944	0.982	17708	1	-2.18	8	-0.55	0.291	4962	0.975	0.709	13093	0.978
GNAT3	-7.87	8	-2.09	0.0183	347	0.944	0.982	17707	1	-7.9	8	-2.14	0.0162	290	0.975	0.984	17765	1
FMOD	-7.87	8	-2.09	0.0183	348	0.944	0.982	17706	1	-6.95	8	-1.88	0.0303	517	0.975	0.97	17538	0.998
CAV1	-7.87	8	-2.09	0.0183	349	0.944	0.982	17705	1	-7.73	8	-2.1	0.0181	324	0.975	0.982	17731	1
ZFYVE28	-7.87	8	-2.09	0.0183	350	0.944	0.982	17704	1	-7.55	8	-2.04	0.0204	354	0.975	0.98	17701	0.999
CHPF	-7.86	8	-2.09	0.0184	351	0.944	0.982	17703	1	-10.29	8	-2.81	0.00251	77	0.588	0.997	17978	1
CCDC106	-7.85	8	-2.09	0.0185	352	0.944	0.982	17702	1	-8.48	8	-2.3	0.0107	211	0.91	0.989	17844	1
RNF220	-7.85	8	-2.09	0.0185	353	0.944	0.982	17701	1	-4.67	8	-1.24	0.107	1757	0.975	0.893	16298	0.989
DNAL4	-7.85	8	-2.09	0.0185	354	0.944	0.981	17700	1	-3.68	8	-0.97	0.167	2792	0.975	0.833	15263	0.985
OR56B1	-7.84	8	-2.08	0.0186	355	0.945	0.981	17699	1	-2.62	8	-0.67	0.25	4248	0.975	0.75	13807	0.979
ARSB	-7.83	8	-2.08	0.0187	356	0.945	0.981	17698	1	-3.45	8	-0.9	0.183	3054	0.975	0.817	15001	0.983
CNOT10	-7.83	8	-2.08	0.0187	357	0.945	0.981	17697	1	-12.48	8	-3.41	0.000319	35	0.165	1	18020	1
PCDH20	-7.83	8	-2.08	0.0187	358	0.945	0.981	17696	1	-5.33	8	-1.43	0.0768	1264	0.975	0.923	16791	0.993
PRSS37	-7.82	8	-2.08	0.0189	359	0.945	0.981	17695	1	-11.86	8	-3.24	0.000595	42	0.256	0.999	18013	1
KCNMB4	-7.82	8	-2.08	0.0189	360	0.945	0.981	17694	1	-7.59	8	-2.06	0.0199	349	0.975	0.98	17706	0.999
CAMSAP1	-7.81	8	-2.07	0.019	361	0.945	0.981	17693	1	-5.79	8	-1.55	0.0601	1002	0.975	0.94	17053	0.995
HHLA2	-7.81	8	-2.07	0.0191	362	0.945	0.981	17692	1	-11.99	8	-3.28	0.000521	41	0.23	0.999	18014	1
PANK1	-7.8	8	-2.07	0.0191	363	0.945	0.981	17691	1	-5.11	8	-1.37	0.0859	1402	0.975	0.914	16653	0.991
MUC2	-7.8	8	-2.07	0.0192	364	0.945	0.981	17690	1	-3.82	8	-1.01	0.157	2608	0.975	0.843	15447	0.985
SIPA1L3	-7.79	8	-2.07	0.0192	365	0.945	0.981	17689	1	-6.65	8	-1.79	0.0365	614	0.975	0.964	17441	0.997
CST6	-7.79	8	-2.07	0.0192	366	0.945	0.981	17688	1	-6.55	8	-1.77	0.0388	648	0.975	0.961	17407	0.997
CCR6	-7.79	8	-2.07	0.0192	367	0.945	0.981	17687	1	-6.62	8	-1.79	0.0371	622	0.975	0.963	17433	0.997
COLCA2	-7.79	8	-2.07	0.0193	368	0.945	0.981	17686	1	-6.48	8	-1.75	0.0404	675	0.975	0.96	17380	0.997
TIMP3	-7.78	8	-2.07	0.0195	369	0.948	0.981	17685	1	-9.77	8	-2.66	0.00388	95	0.733	0.996	17960	1
GNAT2	-7.77	8	-2.06	0.0195	370	0.948	0.981	17684	1	-3.98	8	-1.05	0.146	2425	0.975	0.854	15630	0.986
ZNF470	-7.77	8	-2.06	0.0195	371	0.948	0.98	17683	1	-8.68	8	-2.36	0.00915	185	0.893	0.991	17870	1
GTF2H5	-7.76	8	-2.06	0.0197	372	0.948	0.98	17682	1	-10.18	8	-2.78	0.00275	79	0.63	0.997	17976	1
HNRNPUL2	-7.75	8	-2.06	0.0197	373	0.948	0.98	17681	1	-1.97	8	-0.49	0.312	5346	0.975	0.688	12709	0.977
SMIM20	-7.75	8	-2.06	0.0198	374	0.948	0.98	17680	1	-4.11	8	-1.09	0.138	2297	0.975	0.862	15758	0.987
GPR182	-7.75	8	-2.06	0.0198	375	0.948	0.98	17679	1	-7.07	8	-1.91	0.028	480	0.975	0.972	17575	0.998
TSKU	-7.74	8	-2.05	0.0199	376	0.948	0.98	17678	1	-7.43	8	-2.01	0.0221	376	0.975	0.978	17679	0.999
ZSCAN2	-7.73	8	-2.05	0.02	377	0.948	0.98	17677	1	-6.98	8	-1.89	0.0297	508	0.975	0.97	17547	0.998
FNDC1	-7.73	8	-2.05	0.02	378	0.948	0.98	17676	1	-5.94	8	-1.6	0.0553	924	0.975	0.945	17131	0.995
MMP3	-7.72	8	-2.05	0.0201	379	0.948	0.98	17675	1	-4.66	8	-1.24	0.107	1765	0.975	0.893	16290	0.989
ASS1	-7.72	8	-2.05	0.0201	380	0.948	0.98	17674	1	-7.39	8	-2	0.0228	388	0.975	0.977	17667	0.999
MFAP3L	-7.72	8	-2.05	0.0202	381	0.948	0.98	17673	1	-1.88	8	-0.47	0.32	5520	0.975	0.68	12535	0.977
HBS1L	-7.72	8	-2.05	0.0202	382	0.948	0.98	17672	1	-11.7	8	-3.2	0.000694	44	0.285	0.999	18011	1
CDK4	-7.7	8	-2.04	0.0205	383	0.948	0.98	17671	1	-10.95	8	-2.99	0.0014	54	0.469	0.999	18001	1
GPR135	-7.7	8	-2.04	0.0205	384	0.948	0.979	17670	1	-3.04	8	-0.79	0.215	3612	0.975	0.785	14443	0.981
UGT3A1	-7.69	8	-2.04	0.0206	385	0.948	0.979	17669	1	-6.53	8	-1.76	0.0393	653	0.975	0.961	17402	0.997
CCNB2	-7.68	8	-2.04	0.0207	386	0.948	0.979	17668	1	-7	8	-1.89	0.0293	503	0.975	0.971	17552	0.998
COMP	-7.68	8	-2.04	0.0207	387	0.948	0.979	17667	1	-7.08	8	-1.91	0.0278	476	0.975	0.972	17579	0.998
KAT7	-7.68	8	-2.04	0.0207	388	0.948	0.979	17666	1	-6.78	8	-1.83	0.0336	563	0.975	0.966	17492	0.997
KRT86	-7.68	8	-2.04	0.0208	389	0.948	0.979	17665	1	-7.04	8	-1.9	0.0286	490	0.975	0.971	17565	0.998
CLEC2A	-7.68	8	-2.04	0.0208	390	0.948	0.979	17664	1	-6.29	8	-1.69	0.0451	755	0.975	0.955	17300	0.996
KIAA1755	-7.67	8	-2.04	0.0208	391	0.948	0.979	17663	1	-4.18	8	-1.11	0.134	2222	0.975	0.866	15833	0.987
SNX15	-7.67	8	-2.04	0.0208	392	0.948	0.979	17662	1	-6.51	8	-1.76	0.0396	662	0.975	0.96	17393	0.997
ATXN2L	-7.67	8	-2.04	0.0209	393	0.948	0.979	17661	1	-1.56	8	-0.38	0.353	6157	0.975	0.647	11898	0.977
DNAJC3	-7.67	8	-2.03	0.0209	394	0.948	0.979	17660	1	-5.28	8	-1.41	0.0789	1296	0.975	0.921	16759	0.992
FAM184A	-7.66	8	-2.03	0.021	395	0.948	0.979	17659	1	-5.77	8	-1.55	0.0608	1018	0.975	0.939	17037	0.995
IBTK	-7.66	8	-2.03	0.021	396	0.948	0.979	17658	1	-10.53	8	-2.87	0.00204	71	0.518	0.998	17984	1
TRIO	-7.66	8	-2.03	0.021	397	0.948	0.979	17657	1	-13.36	8	-3.66	0.000127	25	0.0915	1	18030	1
CXorf31	-7.66	8	-2.03	0.021	398	0.948	0.979	17656	1	-7.32	8	-1.98	0.0238	404	0.975	0.976	17651	0.998
ARSG	-7.66	8	-2.03	0.021	399	0.948	0.979	17655	1	-7.84	8	-2.13	0.0168	300	0.975	0.983	17755	1
MTMR9	-7.65	8	-2.03	0.0211	400	0.948	0.979	17654	1	-2.3	8	-0.58	0.28	4769	0.975	0.72	13286	0.978
C9orf64	-7.65	8	-2.03	0.0212	401	0.948	0.979	17653	1	-6.82	8	-1.84	0.0328	555	0.975	0.967	17500	0.998
MCUR1	-7.64	8	-2.03	0.0213	402	0.948	0.979	17652	1	-3.63	8	-0.95	0.17	2848	0.975	0.83	15207	0.985
CD28	-7.63	8	-2.03	0.0214	403	0.948	0.979	17651	1	-6.24	8	-1.68	0.0466	792	0.975	0.953	17263	0.996
ALS2CL	-7.63	8	-2.03	0.0214	404	0.948	0.979	17650	1	-8.53	8	-2.32	0.0103	203	0.91	0.99	17852	1
CCDC40	-7.63	8	-2.03	0.0214	405	0.948	0.979	17649	1	-3.84	8	-1.01	0.156	2577	0.975	0.844	15478	0.985
EIF2B4	-7.63	8	-2.03	0.0214	406	0.948	0.979	17648	1	-7.83	8	-2.12	0.0169	302	0.975	0.983	17753	1
PRSS57	-7.63	8	-2.02	0.0215	407	0.948	0.979	17647	1	-4.48	8	-1.19	0.117	1932	0.975	0.883	16123	0.988
BEST1	-7.62	8	-2.02	0.0215	408	0.948	0.978	17646	1	-6.82	8	-1.84	0.0328	556	0.975	0.967	17499	0.998
ADH4	-7.62	8	-2.02	0.0216	409	0.948	0.978	17645	1	-6.97	8	-1.88	0.0299	512	0.975	0.97	17543	0.998
PEPD	-7.62	8	-2.02	0.0216	410	0.948	0.978	17644	1	-10.68	8	-2.91	0.00178	64	0.494	0.998	17991	1
NABP2	-7.62	8	-2.02	0.0216	411	0.948	0.978	17643	1	-6.03	8	-1.62	0.0525	891	0.975	0.948	17164	0.996
PNPT1	-7.61	8	-2.02	0.0217	412	0.948	0.978	17642	1	0.04	8	0.07	0.527	9558	0.975	0.473	8497	0.977
MAL	-7.61	8	-2.02	0.0217	413	0.948	0.978	17641	1	-5.38	8	-1.44	0.0748	1237	0.975	0.925	16818	0.993
NUP210	-7.61	8	-2.02	0.0217	414	0.948	0.978	17640	1	-7.81	8	-2.12	0.0172	309	0.975	0.983	17746	1
APOF	-7.6	8	-2.02	0.0218	415	0.948	0.978	17639	1	-4.67	8	-1.24	0.107	1754	0.975	0.893	16301	0.989
MNX1	-7.59	8	-2.01	0.022	416	0.949	0.978	17638	1	-3.79	8	-1	0.159	2649	0.975	0.841	15406	0.985
GPX2	-7.59	8	-2.01	0.0221	417	0.949	0.978	17637	1	-4.23	8	-1.12	0.131	2166	0.975	0.869	15889	0.987
LYRM9	-7.58	8	-2.01	0.0221	418	0.949	0.978	17636	1	-7.73	8	-2.09	0.0182	327	0.975	0.982	17728	1
PIK3C2A	-7.58	8	-2.01	0.0221	419	0.949	0.978	17635	1	-5.73	8	-1.54	0.062	1041	0.975	0.938	17014	0.995
TMEM229A	-7.57	8	-2.01	0.0222	420	0.949	0.978	17634	1	-3.58	8	-0.94	0.174	2905	0.975	0.826	15150	0.985
HSPB3	-7.57	8	-2.01	0.0222	421	0.949	0.978	17633	1	-4.94	8	-1.32	0.0936	1537	0.975	0.906	16518	0.99
ERP44	-7.56	8	-2.01	0.0224	422	0.949	0.978	17632	1	-7.98	8	-2.16	0.0153	280	0.975	0.985	17775	1
RGS9BP	-7.56	8	-2.01	0.0224	423	0.949	0.978	17631	1	-4.12	8	-1.09	0.138	2291	0.975	0.862	15764	0.987
ACTR1B	-7.56	8	-2.01	0.0224	424	0.949	0.978	17630	1	-7	8	-1.89	0.0293	502	0.975	0.971	17553	0.998
GEMIN2	-7.56	8	-2.01	0.0225	425	0.949	0.978	17629	1	-4.76	8	-1.27	0.102	1678	0.975	0.898	16377	0.99
PCDHB3	-7.56	8	-2.01	0.0225	426	0.949	0.978	17628	1	-5.81	8	-1.56	0.0594	990	0.975	0.941	17065	0.995
MAD2L1BP	-7.56	8	-2	0.0225	427	0.949	0.978	17627	1	-7.59	8	-2.05	0.02	350	0.975	0.98	17705	0.999
FZD4	-7.56	8	-2	0.0225	428	0.949	0.977	17626	1	-4.73	8	-1.26	0.104	1702	0.975	0.896	16353	0.989
AHRR	-7.55	8	-2	0.0227	429	0.954	0.977	17625	1	-1.57	8	-0.38	0.352	6133	0.975	0.648	11922	0.977
TAS2R46	-3.77	2	-2	0.0228	430	0.954	0.977	17624	1	-3.37	2	-1.82	0.0346	582	0.975	0.965	17473	0.997
MVB12B	-7.53	8	-2	0.0228	431	0.954	0.977	17623	1	-4.85	8	-1.29	0.0978	1610	0.975	0.902	16445	0.99
HLF	-7.53	8	-2	0.0229	432	0.954	0.977	17622	1	-2.9	8	-0.75	0.227	3808	0.975	0.773	14247	0.98
C21orf59	-7.52	8	-2	0.023	433	0.954	0.977	17621	1	-2.56	8	-0.66	0.256	4332	0.975	0.744	13723	0.979
MPZL2	-7.51	8	-1.99	0.0231	434	0.954	0.977	17620	1	-3.99	8	-1.05	0.146	2419	0.975	0.854	15636	0.986
KRTCAP3	-7.51	8	-1.99	0.0232	435	0.954	0.977	17619	1	-7.08	8	-1.91	0.0278	475	0.975	0.972	17580	0.998
MICALCL	-7.5	8	-1.99	0.0234	436	0.954	0.977	17618	1	-5.57	8	-1.49	0.0675	1136	0.975	0.932	16919	0.995
XYLB	-7.49	8	-1.99	0.0234	437	0.954	0.977	17617	1	-6.69	8	-1.8	0.0356	599	0.975	0.964	17456	0.997
CCL28	-6.49	6	-1.99	0.0235	438	0.954	0.977	17616	1	-6.11	6	-1.91	0.0283	488	0.975	0.972	17567	0.998
CCR9	-7.49	8	-1.99	0.0236	439	0.954	0.976	17615	1	-3.99	8	-1.05	0.146	2416	0.975	0.854	15639	0.986
C11orf58	-7.48	8	-1.98	0.0237	440	0.954	0.976	17614	1	-8.09	8	-2.19	0.0141	263	0.967	0.986	17792	1
GAS6	-7.47	8	-1.98	0.0238	441	0.954	0.976	17613	1	-9.34	8	-2.54	0.00552	119	0.818	0.994	17936	1
LACE1	-7.47	8	-1.98	0.0238	442	0.954	0.976	17612	1	-2.65	8	-0.68	0.247	4183	0.975	0.753	13872	0.979
GRXCR1	-7.46	8	-1.98	0.0239	443	0.954	0.976	17611	1	-4.41	8	-1.17	0.121	1985	0.975	0.879	16070	0.988
TMEM151A	-7.46	8	-1.98	0.0239	444	0.954	0.976	17610	1	-7.89	8	-2.14	0.0163	293	0.975	0.984	17762	1
ACACA	-7.46	8	-1.98	0.0239	445	0.954	0.976	17609	1	-12.15	8	-3.32	0.000445	37	0.213	1	18018	1
PVRL2	-7.46	8	-1.98	0.0239	446	0.954	0.976	17608	1	-3.63	8	-0.95	0.17	2855	0.975	0.83	15200	0.985
CERS6	-7.46	8	-1.98	0.024	447	0.954	0.976	17607	1	-6.17	8	-1.66	0.0483	817	0.975	0.952	17238	0.996
USP47	-7.46	8	-1.98	0.024	448	0.954	0.976	17606	1	-6.31	8	-1.7	0.0447	746	0.975	0.955	17309	0.996
FAM102B	-7.46	8	-1.98	0.024	449	0.954	0.976	17605	1	-1.77	8	-0.44	0.331	5722	0.975	0.669	12333	0.977
NFIC	-7.46	8	-1.98	0.024	450	0.954	0.976	17604	1	-8.1	8	-2.2	0.014	262	0.967	0.986	17793	1
TMEM201	-7.46	8	-1.98	0.024	451	0.954	0.976	17603	1	-6.67	8	-1.8	0.0361	607	0.975	0.964	17448	0.997
MAP3K10	-7.46	8	-1.98	0.024	452	0.954	0.976	17602	1	-6.89	8	-1.86	0.0313	530	0.975	0.969	17525	0.998
HID1	-7.45	8	-1.98	0.0241	453	0.954	0.976	17601	1	-8.01	8	-2.17	0.015	273	0.975	0.985	17782	1
ZNF814	-7.45	8	-1.97	0.0242	454	0.954	0.976	17600	1	-7.76	8	-2.1	0.0178	318	0.975	0.982	17737	1
C2orf50	-7.45	8	-1.97	0.0242	455	0.954	0.976	17599	1	-0.34	8	-0.04	0.485	8721	0.975	0.515	9334	0.977
KIAA1984	-7.45	8	-1.97	0.0242	456	0.954	0.976	17598	1	-7.33	8	-1.98	0.0236	399	0.975	0.976	17656	0.998
SCLY	-7.45	8	-1.97	0.0242	457	0.954	0.976	17597	1	-3.27	8	-0.85	0.196	3270	0.975	0.804	14785	0.981
CHST13	-7.44	8	-1.97	0.0242	458	0.954	0.976	17596	1	-9.51	8	-2.59	0.00483	109	0.8	0.995	17946	1
PFN2	-7.44	8	-1.97	0.0243	459	0.954	0.976	17595	1	-3.21	8	-0.84	0.201	3360	0.975	0.799	14695	0.981
APBB3	-7.43	8	-1.97	0.0244	460	0.954	0.976	17594	1	-3.63	8	-0.95	0.17	2845	0.975	0.83	15210	0.985
OR9G1	-7.43	8	-1.97	0.0245	461	0.954	0.976	17593	1	-8.6	8	-2.34	0.00973	195	0.896	0.99	17860	1
SOCS3	-7.42	8	-1.97	0.0245	462	0.954	0.975	17592	1	-12.12	8	-3.31	0.000459	39	0.213	1	18016	1
FOXP4	-7.42	8	-1.97	0.0245	463	0.954	0.975	17591	1	-4.34	8	-1.15	0.125	2068	0.975	0.875	15987	0.988
SERPINA10	-7.41	8	-1.97	0.0247	464	0.954	0.975	17590	1	-2.31	8	-0.59	0.279	4746	0.975	0.721	13309	0.978
SGCE	-7.41	8	-1.96	0.0247	465	0.954	0.975	17589	1	-7.23	8	-1.95	0.0253	429	0.975	0.975	17626	0.998
ZC3HAV1L	-7.41	8	-1.96	0.0248	466	0.954	0.975	17588	1	-7.77	8	-2.1	0.0177	316	0.975	0.982	17739	1
CLEC1A	-7.4	8	-1.96	0.0248	467	0.954	0.975	17587	1	-5.73	8	-1.54	0.062	1042	0.975	0.938	17013	0.995
PADI4	-7.4	8	-1.96	0.0249	468	0.954	0.975	17586	1	-5.59	8	-1.5	0.0671	1132	0.975	0.933	16923	0.995
MPP2	-7.4	8	-1.96	0.025	469	0.954	0.975	17585	1	-4.78	8	-1.27	0.101	1663	0.975	0.899	16392	0.99
TMEM115	-7.38	8	-1.96	0.0252	470	0.954	0.975	17584	1	-7.31	8	-1.98	0.0241	412	0.975	0.976	17643	0.998
C3orf72	-7.38	8	-1.96	0.0252	471	0.954	0.975	17583	1	-4.43	8	-1.18	0.12	1969	0.975	0.88	16086	0.988
PKMYT1	-7.38	8	-1.96	0.0252	472	0.954	0.975	17582	1	-5.11	8	-1.36	0.0862	1406	0.975	0.914	16649	0.991
PSMA3	-6.9	7	-1.96	0.0252	473	0.954	0.975	17581	1	-5.16	8	-1.38	0.0838	1367	0.975	0.916	16688	0.991
ABCB5	-7.38	8	-1.96	0.0253	474	0.954	0.975	17580	1	-3.9	8	-1.03	0.152	2525	0.975	0.848	15530	0.985
APOBEC3F	-7.38	8	-1.96	0.0253	475	0.954	0.975	17579	1	-2.86	8	-0.74	0.229	3862	0.975	0.771	14193	0.98
VCX2	-5.22	4	-1.95	0.0253	476	0.954	0.975	17578	1	-1.81	4	-0.65	0.256	4349	0.975	0.744	13706	0.979
ASUN	-7.38	8	-1.95	0.0253	477	0.954	0.975	17577	1	-2.13	8	-0.54	0.296	5056	0.975	0.704	12999	0.978
ATP2A3	-7.37	8	-1.95	0.0253	478	0.954	0.975	17576	1	-3.43	8	-0.9	0.185	3079	0.975	0.815	14976	0.983
SETD5	-7.37	8	-1.95	0.0255	479	0.954	0.975	17575	1	-7.49	8	-2.03	0.0213	361	0.975	0.979	17694	0.999
PPP3CC	-7.36	8	-1.95	0.0255	480	0.954	0.974	17574	1	-3.93	8	-1.04	0.15	2487	0.975	0.85	15568	0.985
PRKRIP1	-7.36	8	-1.95	0.0256	481	0.954	0.974	17573	1	-1.47	8	-0.35	0.362	6336	0.975	0.638	11719	0.977
PPP2R2B	-7.36	8	-1.95	0.0256	482	0.954	0.974	17572	1	-6.25	8	-1.68	0.0462	782	0.975	0.954	17273	0.996
SLC7A4	-7.36	8	-1.95	0.0256	483	0.954	0.974	17571	1	-7.96	8	-2.16	0.0155	283	0.975	0.984	17772	1
PRRC2A	-7.36	8	-1.95	0.0256	484	0.954	0.974	17570	1	0.27	8	0.13	0.552	10045	0.975	0.448	8010	0.977
CCDC167	-6.37	6	-1.95	0.0257	485	0.954	0.974	17569	1	-7.14	6	-2.24	0.0126	237	0.949	0.987	17818	1
KIF13A	-7.35	8	-1.95	0.0258	486	0.954	0.974	17568	1	-3.39	8	-0.89	0.188	3135	0.975	0.812	14920	0.983
CREB1	-7.35	8	-1.95	0.0258	487	0.954	0.974	17567	1	-10.58	8	-2.89	0.00195	69	0.511	0.998	17986	1
CLEC2L	-7.35	8	-1.95	0.0258	488	0.954	0.974	17566	1	-2.57	8	-0.66	0.255	4323	0.975	0.745	13732	0.979
OMP	-7.34	8	-1.94	0.0259	489	0.954	0.974	17565	1	-6.04	8	-1.62	0.0522	887	0.975	0.948	17168	0.996
SNX17	-7.34	8	-1.94	0.0259	490	0.954	0.974	17564	1	-4	8	-1.06	0.145	2410	0.975	0.855	15645	0.986
CHST4	-7.33	8	-1.94	0.026	491	0.954	0.974	17563	1	-5.67	8	-1.52	0.0641	1078	0.975	0.936	16977	0.995
C6orf132	-7.33	8	-1.94	0.026	492	0.954	0.974	17562	1	-6.62	8	-1.79	0.037	619	0.975	0.963	17436	0.997
TAF8	-7.33	8	-1.94	0.0261	493	0.955	0.974	17561	1	-8.8	8	-2.39	0.0084	170	0.886	0.992	17885	1
RPN2	-7.32	8	-1.94	0.0262	494	0.955	0.974	17560	1	-6.55	8	-1.76	0.0388	649	0.975	0.961	17406	0.997
GPHN	-7.32	8	-1.94	0.0262	495	0.955	0.974	17559	1	-3.23	8	-0.84	0.2	3333	0.975	0.8	14722	0.981
YJEFN3	-7.31	8	-1.94	0.0264	496	0.96	0.974	17558	1	-6.2	8	-1.67	0.0476	805	0.975	0.952	17250	0.996
EEA1	-7.3	8	-1.93	0.0266	497	0.961	0.973	17557	1	-4.83	8	-1.29	0.0991	1631	0.975	0.901	16424	0.99
GALE	-7.3	8	-1.93	0.0266	498	0.961	0.973	17556	1	-6.7	8	-1.81	0.0353	594	0.975	0.965	17461	0.997
BSX	-7.29	8	-1.93	0.0267	499	0.961	0.973	17555	1	-2.73	8	-0.7	0.241	4067	0.975	0.759	13988	0.98
SYNGR3	-7.29	8	-1.93	0.0267	500	0.961	0.973	17554	1	-4.08	8	-1.08	0.141	2335	0.975	0.859	15720	0.987
KCNK2	-7.28	8	-1.93	0.0269	501	0.961	0.973	17553	1	-1.87	8	-0.47	0.321	5531	0.975	0.679	12524	0.977
PTH1R	-7.28	8	-1.93	0.0269	502	0.961	0.973	17552	1	-9.22	8	-2.51	0.00606	130	0.824	0.994	17925	1
OR4A47	-7.28	8	-1.93	0.0269	503	0.961	0.973	17551	1	-8.7	8	-2.36	0.00906	183	0.891	0.991	17872	1
GID8	-7.28	8	-1.93	0.0269	504	0.961	0.973	17550	1	-5.54	8	-1.49	0.0687	1147	0.975	0.931	16908	0.994
TMEM106C	-7.27	8	-1.93	0.027	505	0.961	0.973	17549	1	-5.68	8	-1.52	0.0639	1071	0.975	0.936	16984	0.995
ZDBF2	-7.27	8	-1.93	0.0271	506	0.961	0.973	17548	1	-4.76	8	-1.27	0.102	1677	0.975	0.898	16378	0.99
NOD1	-7.27	8	-1.92	0.0271	507	0.961	0.973	17547	1	-6.36	8	-1.71	0.0433	733	0.975	0.957	17322	0.997
ASCC2	-7.27	8	-1.92	0.0272	508	0.961	0.973	17546	1	-8.2	8	-2.22	0.013	247	0.949	0.987	17808	1
HSD17B10	-7.27	8	-1.92	0.0272	509	0.961	0.973	17545	1	-1.34	8	-0.32	0.376	6615	0.975	0.624	11440	0.977
RTCB	-7.26	8	-1.92	0.0272	510	0.961	0.973	17544	1	-9.15	8	-2.49	0.00642	140	0.824	0.994	17915	1
OR52M1	-7.26	8	-1.92	0.0272	511	0.961	0.973	17543	1	-8.6	8	-2.34	0.00973	196	0.896	0.99	17859	1
FDXR	-7.26	8	-1.92	0.0273	512	0.964	0.973	17542	1	-1.03	8	-0.23	0.409	7274	0.975	0.591	10781	0.977
TTC16	-7.25	8	-1.92	0.0274	513	0.964	0.973	17541	1	-3.9	8	-1.03	0.152	2523	0.975	0.848	15532	0.985
ARHGAP1	-7.25	8	-1.92	0.0274	514	0.964	0.973	17540	1	-12.44	8	-3.41	0.000331	36	0.166	1	18019	1
CCDC87	-7.24	8	-1.92	0.0276	515	0.968	0.972	17539	1	-6.11	8	-1.64	0.0503	853	0.975	0.95	17202	0.996
LPXN	-7.23	8	-1.92	0.0277	516	0.969	0.972	17538	1	-6.87	8	-1.86	0.0318	537	0.975	0.968	17518	0.998
KIAA1429	-7.23	8	-1.92	0.0277	517	0.969	0.972	17537	1	-0.95	8	-0.21	0.418	7438	0.975	0.582	10617	0.977
ASCC3	-7.22	8	-1.91	0.028	518	0.977	0.972	17536	1	-7.56	8	-2.05	0.0204	353	0.975	0.98	17702	0.999
MSX2	-7.21	8	-1.91	0.0281	519	0.977	0.972	17535	1	-5.72	8	-1.54	0.0624	1045	0.975	0.938	17010	0.995
CDH18	-7.21	8	-1.91	0.0282	520	0.977	0.972	17534	1	-3.61	8	-0.95	0.172	2881	0.975	0.828	15174	0.985
AMOTL1	-7.21	8	-1.91	0.0282	521	0.977	0.972	17533	1	-1.1	8	-0.25	0.402	7132	0.975	0.598	10923	0.977
KIF18A	-7.2	8	-1.91	0.0283	522	0.979	0.972	17532	1	-3.47	8	-0.91	0.182	3030	0.975	0.818	15025	0.983
APLNR	-7.2	8	-1.91	0.0284	523	0.979	0.972	17531	1	-6.26	8	-1.68	0.0461	780	0.975	0.954	17275	0.996
ING5	-6.23	6	-1.9	0.0285	524	0.98	0.972	17530	1	-6.82	6	-2.13	0.0164	294	0.975	0.984	17761	1
OSBPL11	-7.19	8	-1.9	0.0285	525	0.98	0.971	17529	1	-6.39	8	-1.72	0.0425	713	0.975	0.958	17342	0.997
HDAC1	-7.19	8	-1.9	0.0286	526	0.98	0.971	17528	1	-4.45	8	-1.18	0.119	1951	0.975	0.881	16104	0.988
ZBED5	-7.18	8	-1.9	0.0286	527	0.98	0.971	17527	1	-3.19	8	-0.83	0.203	3382	0.975	0.797	14673	0.981
PARL	-7.18	8	-1.9	0.0287	528	0.98	0.971	17526	1	-2.32	8	-0.59	0.278	4740	0.975	0.722	13315	0.978
HIF1A	-7.17	8	-1.9	0.0288	529	0.98	0.971	17525	1	-8.21	8	-2.23	0.013	246	0.949	0.987	17809	1
NLRP5	-7.17	8	-1.9	0.0288	530	0.98	0.971	17524	1	-8.78	8	-2.38	0.00855	173	0.886	0.991	17882	1
BARX1	-7.16	8	-1.9	0.029	531	0.98	0.971	17523	1	-6.99	8	-1.89	0.0295	506	0.975	0.97	17549	0.998
CALCB	-6.2	6	-1.9	0.029	532	0.98	0.971	17522	1	-4.21	6	-1.3	0.0976	1605	0.975	0.902	16450	0.99
WDR49	-7.16	8	-1.9	0.029	533	0.98	0.971	17521	1	-9.06	8	-2.47	0.00685	150	0.824	0.993	17905	1
PRSS21	-7.16	8	-1.9	0.029	534	0.98	0.971	17520	1	-3.42	8	-0.89	0.186	3094	0.975	0.814	14961	0.983
FOXC1	-7.16	8	-1.89	0.0291	535	0.98	0.971	17519	1	-6.55	8	-1.77	0.0388	647	0.975	0.961	17408	0.997
ESF1	-7.16	8	-1.89	0.0291	536	0.98	0.971	17518	1	-4.9	8	-1.31	0.0957	1575	0.975	0.904	16480	0.99
FCHSD2	-7.15	8	-1.89	0.0292	537	0.98	0.971	17517	1	-7.05	8	-1.91	0.0283	487	0.975	0.972	17568	0.998
FBP1	-7.15	8	-1.89	0.0292	538	0.98	0.971	17516	1	-6.47	8	-1.74	0.0407	681	0.975	0.959	17374	0.997
RAD17	-7.15	8	-1.89	0.0293	539	0.98	0.971	17515	1	-7.48	8	-2.03	0.0214	363	0.975	0.979	17692	0.999
2022-09-02	-7.14	8	-1.89	0.0294	540	0.98	0.971	17514	1	-7.45	8	-2.02	0.0219	371	0.975	0.978	17684	0.999
HCRTR2	-7.14	8	-1.89	0.0294	541	0.98	0.971	17513	1	-1.32	8	-0.31	0.378	6658	0.975	0.622	11397	0.977
CYBRD1	-7.14	8	-1.89	0.0294	542	0.981	0.971	17512	1	-8.39	8	-2.28	0.0114	224	0.92	0.989	17831	1
HTATSF1	-7.13	8	-1.89	0.0296	543	0.982	0.97	17511	1	-6.22	8	-1.67	0.0472	799	0.975	0.953	17256	0.996
NTN4	-7.13	8	-1.89	0.0296	544	0.982	0.97	17510	1	-6.76	8	-1.82	0.034	572	0.975	0.966	17483	0.997
IRAK3	-7.13	8	-1.89	0.0296	545	0.982	0.97	17509	1	-4.88	8	-1.3	0.0964	1584	0.975	0.904	16471	0.99
CALM1	-7.12	8	-1.89	0.0297	546	0.982	0.97	17508	1	-4.72	8	-1.26	0.105	1719	0.975	0.895	16336	0.989
STAB2	-7.12	8	-1.88	0.0298	547	0.982	0.97	17507	1	-7.22	8	-1.95	0.0254	432	0.975	0.975	17623	0.998
PTPRF	-7.11	8	-1.88	0.03	548	0.982	0.97	17506	1	-2.64	8	-0.68	0.248	4201	0.975	0.752	13854	0.979
KCNJ11	-7.11	8	-1.88	0.03	549	0.982	0.97	17505	1	-6.23	8	-1.68	0.0469	797	0.975	0.953	17258	0.996
PDCD7	-7.1	8	-1.88	0.0301	550	0.982	0.97	17504	1	-2.64	8	-0.68	0.249	4208	0.975	0.751	13847	0.979
COX8A	-7.1	8	-1.88	0.0302	551	0.982	0.97	17503	1	-8.36	8	-2.27	0.0116	226	0.925	0.988	17829	1
RRAS2	-7.1	8	-1.88	0.0302	552	0.982	0.97	17502	1	-6.79	8	-1.83	0.0334	560	0.975	0.967	17495	0.997
C7orf73	-7.1	8	-1.88	0.0302	553	0.982	0.97	17501	1	-3.58	8	-0.94	0.174	2909	0.975	0.826	15146	0.985
PTN	-7.09	8	-1.88	0.0303	554	0.982	0.97	17500	1	-5.66	8	-1.52	0.0643	1080	0.975	0.936	16975	0.995
ARPP21	-7.08	8	-1.87	0.0305	555	0.982	0.969	17499	1	-6.45	8	-1.74	0.041	685	0.975	0.959	17370	0.997
ACTA2	-7.08	8	-1.87	0.0306	556	0.982	0.969	17498	1	-9.3	8	-2.53	0.00571	126	0.818	0.994	17929	1
MAGEB6	-7.08	8	-1.87	0.0306	557	0.982	0.969	17497	1	-7.33	8	-1.98	0.0238	403	0.975	0.976	17652	0.998
MADD	-7.08	8	-1.87	0.0306	558	0.982	0.969	17496	1	-8.56	8	-2.32	0.0101	199	0.91	0.99	17856	1
NFIL3	-7.07	8	-1.87	0.0306	559	0.982	0.969	17495	1	-9.28	8	-2.52	0.00579	127	0.823	0.994	17928	1
BLMH	-7.07	8	-1.87	0.0307	560	0.982	0.969	17494	1	-5.23	8	-1.4	0.0812	1326	0.975	0.919	16729	0.992
MKRN3	-7.07	8	-1.87	0.0307	561	0.982	0.969	17493	1	-6.63	8	-1.79	0.0369	617	0.975	0.963	17438	0.997
CALCOCO2	-7.07	8	-1.87	0.0307	562	0.982	0.969	17492	1	-7.25	8	-1.96	0.025	423	0.975	0.975	17632	0.998
CASC4	-7.07	8	-1.87	0.0308	563	0.982	0.969	17491	1	-5.67	8	-1.52	0.0641	1077	0.975	0.936	16978	0.995
SHANK3	-7.06	8	-1.87	0.0309	564	0.982	0.969	17490	1	-3.64	8	-0.96	0.169	2841	0.975	0.831	15214	0.985
RHOT1	-7.06	8	-1.87	0.0309	565	0.982	0.969	17489	1	-2.2	8	-0.56	0.289	4926	0.975	0.711	13129	0.978
RABEP1	-7.06	8	-1.87	0.031	566	0.982	0.969	17488	1	-7	8	-1.89	0.0293	501	0.975	0.971	17554	0.998
CCNT1	-7.06	8	-1.87	0.031	567	0.982	0.969	17487	1	-6.16	8	-1.66	0.0488	824	0.975	0.951	17231	0.996
FAM111A	-7.06	8	-1.87	0.031	568	0.982	0.969	17486	1	-4.19	8	-1.11	0.133	2204	0.975	0.867	15851	0.987
GRINA	-7.06	8	-1.87	0.031	569	0.982	0.969	17485	1	-1.95	8	-0.49	0.314	5383	0.975	0.686	12672	0.977
CCDC50	-7.05	8	-1.87	0.0311	570	0.982	0.969	17484	1	-2.81	8	-0.73	0.234	3943	0.975	0.766	14112	0.98
ABHD8	-7.05	8	-1.86	0.0311	571	0.982	0.969	17483	1	-5.25	8	-1.4	0.0802	1313	0.975	0.92	16742	0.992
RABAC1	-7.04	8	-1.86	0.0313	572	0.982	0.969	17482	1	-5.29	8	-1.41	0.0786	1290	0.975	0.921	16765	0.992
NELL2	-7.03	8	-1.86	0.0314	573	0.982	0.969	17481	1	-5.51	8	-1.48	0.0699	1160	0.975	0.93	16895	0.994
CD47	-7.03	8	-1.86	0.0315	574	0.982	0.969	17480	1	-2.73	8	-0.7	0.241	4080	0.975	0.759	13975	0.98
BARD1	-7.03	8	-1.86	0.0315	575	0.982	0.969	17479	1	-3.25	8	-0.85	0.198	3299	0.975	0.802	14756	0.981
LLGL2	-7.02	8	-1.86	0.0316	576	0.982	0.968	17478	1	-7.1	8	-1.92	0.0276	471	0.975	0.972	17584	0.998
CAT	-7.02	8	-1.86	0.0317	577	0.982	0.968	17477	1	-7.11	8	-1.92	0.0272	462	0.975	0.973	17593	0.998
SENP6	-7.02	8	-1.86	0.0317	578	0.982	0.968	17476	1	-2.09	8	-0.53	0.299	5120	0.975	0.701	12935	0.978
VKORC1	-7.02	8	-1.86	0.0318	579	0.982	0.968	17475	1	-5.43	8	-1.46	0.0728	1207	0.975	0.927	16848	0.993
AQP6	-7.02	8	-1.86	0.0318	580	0.982	0.968	17474	1	-3.9	8	-1.03	0.152	2520	0.975	0.848	15535	0.985
TAS2R40	-7.01	8	-1.85	0.0318	581	0.982	0.968	17473	1	-4.43	8	-1.18	0.12	1972	0.975	0.88	16083	0.988
OR51G2	-7.01	8	-1.85	0.0319	582	0.982	0.968	17472	1	-6.1	8	-1.64	0.0506	858	0.975	0.949	17197	0.996
DDX43	-7	8	-1.85	0.0321	583	0.982	0.968	17471	1	-5.52	8	-1.48	0.0694	1153	0.975	0.931	16902	0.994
AMH	-6.99	8	-1.85	0.0322	584	0.982	0.968	17470	1	-1.96	8	-0.49	0.312	5359	0.975	0.688	12696	0.977
TMEM211	-6.99	8	-1.85	0.0323	585	0.982	0.968	17469	1	-8.49	8	-2.31	0.0105	208	0.91	0.989	17847	1
NLE1	-6.99	8	-1.85	0.0323	586	0.982	0.968	17468	1	-7.81	8	-2.12	0.0172	308	0.975	0.983	17747	1
DNLZ	-6.99	8	-1.85	0.0323	587	0.982	0.968	17467	1	0.76	8	0.27	0.605	11089	0.975	0.395	6966	0.977
ANKRD66	-6.98	8	-1.85	0.0324	588	0.982	0.968	17466	1	-3.86	8	-1.02	0.154	2560	0.975	0.846	15495	0.985
C1orf159	-6.98	8	-1.84	0.0326	589	0.982	0.967	17465	1	-6.85	8	-1.85	0.0322	545	0.975	0.968	17510	0.998
LRRC10	-6.98	8	-1.84	0.0326	590	0.982	0.967	17464	1	-6.78	8	-1.83	0.0336	564	0.975	0.966	17491	0.997
ADAM22	-6.98	8	-1.84	0.0326	591	0.982	0.967	17463	1	-5.27	8	-1.41	0.0791	1298	0.975	0.921	16757	0.992
RNF135	-6.96	8	-1.84	0.033	592	0.982	0.967	17462	1	-5.04	8	-1.35	0.089	1461	0.975	0.911	16594	0.991
TFB2M	-6.95	8	-1.84	0.033	593	0.982	0.967	17461	1	3.01	8	0.89	0.814	14945	0.982	0.186	3110	0.977
PRR5L	-6.95	8	-1.84	0.0331	594	0.982	0.967	17460	1	-3.55	8	-0.93	0.176	2935	0.975	0.824	15120	0.984
GTPBP3	-6.95	8	-1.84	0.0331	595	0.982	0.967	17459	1	-6.93	8	-1.87	0.0306	521	0.975	0.969	17534	0.998
GLYATL1	-6.95	8	-1.84	0.0332	596	0.982	0.967	17458	1	-6.43	8	-1.73	0.0416	695	0.975	0.958	17360	0.997
KDM3B	-6.94	8	-1.83	0.0333	597	0.982	0.967	17457	1	-1.49	8	-0.36	0.36	6291	0.975	0.64	11764	0.977
ZNF619	-6.94	8	-1.83	0.0333	598	0.982	0.967	17456	1	-5.32	8	-1.42	0.0773	1273	0.975	0.923	16782	0.993
FBXO3	-6.94	8	-1.83	0.0333	599	0.982	0.967	17455	1	-8	8	-2.17	0.0151	274	0.975	0.985	17781	1
KDELR1	-6.94	8	-1.83	0.0333	600	0.982	0.967	17454	1	-4.59	8	-1.22	0.111	1829	0.975	0.889	16226	0.989
HSPA8	-6.94	8	-1.83	0.0334	601	0.982	0.967	17453	1	-7.69	8	-2.08	0.0186	337	0.975	0.981	17718	1
KCNMB3	-6.93	8	-1.83	0.0336	602	0.982	0.966	17452	1	-7.43	8	-2.01	0.0222	379	0.975	0.978	17676	0.999
CEP89	-6.93	8	-1.83	0.0336	603	0.982	0.966	17451	1	-8.21	8	-2.23	0.0129	244	0.949	0.987	17811	1
TAS2R16	-6.93	8	-1.83	0.0336	604	0.982	0.966	17450	1	-3.32	8	-0.87	0.193	3204	0.975	0.807	14851	0.981
SMEK1	-6.92	8	-1.83	0.0337	605	0.982	0.966	17449	1	-6.66	8	-1.8	0.0363	610	0.975	0.964	17445	0.997
PLEKHA3	-6.92	8	-1.83	0.0337	606	0.982	0.966	17448	1	-8.28	8	-2.25	0.0123	233	0.949	0.988	17822	1
HOXA9	-6.92	8	-1.83	0.0337	607	0.982	0.966	17447	1	-6.62	8	-1.78	0.0372	625	0.975	0.963	17430	0.997
MLH3	-6.91	8	-1.83	0.0339	608	0.982	0.966	17446	1	-5.66	8	-1.52	0.0643	1082	0.975	0.936	16973	0.995
UPP1	-6.91	8	-1.83	0.0339	609	0.982	0.966	17445	1	-5.79	8	-1.55	0.0601	1001	0.975	0.94	17054	0.995
GLO1	-6.91	8	-1.83	0.0339	610	0.982	0.966	17444	1	-4.85	8	-1.29	0.098	1613	0.975	0.902	16442	0.99
IL10RB	-6.9	8	-1.82	0.034	611	0.982	0.966	17443	1	-4.31	8	-1.14	0.127	2097	0.975	0.873	15958	0.988
PPP5C	-6.9	8	-1.82	0.0341	612	0.982	0.966	17442	1	-8.61	8	-2.34	0.00969	191	0.896	0.99	17864	1
NIPSNAP1	-6.9	8	-1.82	0.0341	613	0.982	0.966	17441	1	-6.01	8	-1.61	0.0532	894	0.975	0.947	17161	0.996
BCCIP	-6.9	8	-1.82	0.0341	614	0.982	0.966	17440	1	-6.07	8	-1.63	0.0512	869	0.975	0.949	17186	0.996
LUZP1	-6.9	8	-1.82	0.0341	615	0.982	0.966	17439	1	-5.18	8	-1.38	0.0831	1357	0.975	0.917	16698	0.991
OR51F2	-6.9	8	-1.82	0.0341	616	0.982	0.966	17438	1	-3.11	8	-0.81	0.209	3509	0.975	0.791	14546	0.981
DHX37	-6.9	8	-1.82	0.0341	617	0.982	0.966	17437	1	-6.72	8	-1.81	0.0349	586	0.975	0.965	17469	0.997
ABCF3	-6.9	8	-1.82	0.0342	618	0.982	0.966	17436	1	-10.61	8	-2.89	0.0019	68	0.505	0.998	17987	1
SIK3	-6.9	8	-1.82	0.0342	619	0.982	0.966	17435	1	-7.75	8	-2.1	0.0179	319	0.975	0.982	17736	1
OPN1SW	-6.89	8	-1.82	0.0343	620	0.982	0.966	17434	1	-6.31	8	-1.7	0.0446	744	0.975	0.955	17311	0.996
CLASP2	-6.89	8	-1.82	0.0343	621	0.982	0.966	17433	1	-7.49	8	-2.03	0.0213	359	0.975	0.979	17696	0.999
NLRP14	-6.89	8	-1.82	0.0344	622	0.982	0.966	17432	1	-6.78	8	-1.83	0.0337	567	0.975	0.966	17488	0.997
ACKR4	-6.89	8	-1.82	0.0344	623	0.982	0.966	17431	1	-5.22	8	-1.4	0.0813	1330	0.975	0.919	16725	0.992
RBBP7	-6.89	8	-1.82	0.0344	624	0.982	0.966	17430	1	-7.07	8	-1.91	0.0281	482	0.975	0.972	17573	0.998
AR	-6.88	8	-1.82	0.0345	625	0.982	0.966	17429	1	-5.59	8	-1.5	0.0671	1134	0.975	0.933	16921	0.995
PRIM1	-6.88	8	-1.82	0.0345	626	0.982	0.966	17428	1	-3.74	8	-0.98	0.163	2712	0.975	0.837	15343	0.985
ATG4B	-6.88	8	-1.82	0.0345	627	0.982	0.966	17427	1	-3.95	8	-1.04	0.149	2459	0.975	0.851	15596	0.986
RAET1E	-6.88	8	-1.82	0.0345	628	0.982	0.966	17426	1	-6.11	8	-1.64	0.0502	850	0.975	0.95	17205	0.996
KRT73	-6.88	8	-1.82	0.0346	629	0.982	0.965	17425	1	-10.95	8	-2.99	0.0014	53	0.469	0.999	18002	1
CEP55	-6.88	8	-1.82	0.0346	630	0.982	0.965	17424	1	-1.28	8	-0.3	0.382	6762	0.975	0.618	11293	0.977
HAT1	-6.88	8	-1.82	0.0346	631	0.982	0.965	17423	1	-5.19	8	-1.39	0.0827	1350	0.975	0.917	16705	0.991
DKK3	-6.88	8	-1.82	0.0347	632	0.982	0.965	17422	1	-8.27	8	-2.24	0.0124	235	0.949	0.988	17820	1
ZNF426	-6.87	8	-1.82	0.0347	633	0.982	0.965	17421	1	-8.08	8	-2.19	0.0142	265	0.967	0.986	17790	1
DZANK1	-6.87	8	-1.82	0.0347	634	0.982	0.965	17420	1	-9.48	8	-2.58	0.00494	110	0.811	0.995	17945	1
AAMDC	-6.87	8	-1.82	0.0347	635	0.982	0.965	17419	1	-8.55	8	-2.32	0.0101	200	0.91	0.99	17855	1
CLDN25	-6.87	8	-1.81	0.0348	636	0.982	0.965	17418	1	-8.21	8	-2.23	0.013	245	0.949	0.987	17810	1
PIDD	-6.87	8	-1.81	0.0348	637	0.982	0.965	17417	1	0.06	8	0.07	0.528	9586	0.975	0.472	8469	0.977
DPP3	-6.86	8	-1.81	0.035	638	0.982	0.965	17416	1	-4.72	8	-1.26	0.104	1712	0.975	0.896	16343	0.989
ZNF592	-6.86	8	-1.81	0.0351	639	0.982	0.965	17415	1	-4.22	8	-1.12	0.132	2169	0.975	0.868	15886	0.987
WDR76	-6.85	8	-1.81	0.0351	640	0.982	0.965	17414	1	-7.82	8	-2.12	0.017	305	0.975	0.983	17750	1
SBNO2	-6.85	8	-1.81	0.0352	641	0.982	0.965	17413	1	-5.69	8	-1.53	0.0635	1065	0.975	0.937	16990	0.995
SLC2A2	-6.85	8	-1.81	0.0353	642	0.982	0.965	17412	1	-5.94	8	-1.6	0.0552	921	0.975	0.945	17134	0.995
HOXC9	-6.85	8	-1.81	0.0353	643	0.982	0.965	17411	1	-4.48	8	-1.19	0.117	1925	0.975	0.883	16130	0.988
KRTAP19-7	-4.84	4	-1.81	0.0353	644	0.982	0.965	17410	1	-2.91	4	-1.09	0.139	2305	0.975	0.861	15750	0.987
PRICKLE3	-6.84	8	-1.81	0.0353	645	0.982	0.965	17409	1	-5.83	8	-1.56	0.0589	979	0.975	0.941	17076	0.995
NEUROD6	-6.84	8	-1.81	0.0354	646	0.982	0.965	17408	1	-5.44	8	-1.46	0.0726	1200	0.975	0.927	16855	0.993
CNTN1	-6.84	8	-1.81	0.0354	647	0.982	0.965	17407	1	-4.91	8	-1.31	0.0951	1567	0.975	0.905	16488	0.99
IPMK	-6.84	8	-1.81	0.0355	648	0.982	0.965	17406	1	-4.41	8	-1.17	0.121	1987	0.975	0.879	16068	0.988
PRR15	-6.84	8	-1.81	0.0355	649	0.982	0.964	17405	1	-2.47	8	-0.63	0.264	4483	0.975	0.736	13572	0.978
NCF4	-6.83	8	-1.8	0.0356	650	0.982	0.964	17404	1	-1.62	8	-0.39	0.347	6035	0.975	0.653	12020	0.977
OR51B6	-6.83	8	-1.8	0.0356	651	0.982	0.964	17403	1	-7.04	8	-1.9	0.0286	489	0.975	0.971	17566	0.998
FAM181B	-6.83	8	-1.8	0.0357	652	0.982	0.964	17402	1	-4.15	8	-1.1	0.136	2256	0.975	0.864	15799	0.987
C9orf72	-6.82	8	-1.8	0.0358	653	0.982	0.964	17401	1	-4.75	8	-1.27	0.103	1687	0.975	0.897	16368	0.989
HTATIP2	-6.82	8	-1.8	0.0358	654	0.982	0.964	17400	1	-7.37	8	-1.99	0.0231	391	0.975	0.977	17664	0.998
NAALADL2	-6.82	8	-1.8	0.0358	655	0.982	0.964	17399	1	-6.25	8	-1.68	0.0463	784	0.975	0.954	17271	0.996
TPO	-6.82	8	-1.8	0.0358	656	0.982	0.964	17398	1	-3.22	8	-0.84	0.2	3343	0.975	0.8	14712	0.981
UBL3	-6.82	8	-1.8	0.0359	657	0.982	0.964	17397	1	-5.37	8	-1.44	0.0755	1246	0.975	0.925	16809	0.993
BTBD3	-6.82	8	-1.8	0.0359	658	0.982	0.964	17396	1	-4.77	8	-1.27	0.102	1667	0.975	0.898	16388	0.99
CCDC88B	-6.81	8	-1.8	0.0361	659	0.982	0.964	17395	1	-2.96	8	-0.77	0.221	3720	0.975	0.779	14335	0.981
PRRG4	-6.8	8	-1.8	0.0362	660	0.982	0.964	17394	1	-6.84	8	-1.85	0.0324	552	0.975	0.968	17503	0.998
CRYAB	-6.8	8	-1.8	0.0363	661	0.982	0.964	17393	1	-6.85	8	-1.85	0.0323	548	0.975	0.968	17507	0.998
ACR	-6.8	8	-1.8	0.0363	662	0.982	0.964	17392	1	-6.11	8	-1.64	0.0502	852	0.975	0.95	17203	0.996
APOA1	-6.8	8	-1.79	0.0364	663	0.982	0.964	17391	1	-3.71	8	-0.98	0.164	2743	0.975	0.836	15312	0.985
NSMF	-5.89	6	-1.79	0.0364	664	0.982	0.964	17390	1	-1.03	6	-0.28	0.391	6925	0.975	0.609	11130	0.977
RPS6KA4	-6.79	8	-1.79	0.0365	665	0.982	0.964	17389	1	-7.36	8	-1.99	0.0232	393	0.975	0.977	17662	0.998
TMED10	-6.79	8	-1.79	0.0365	666	0.982	0.964	17388	1	-0.06	8	0.04	0.516	9321	0.975	0.484	8734	0.977
DLX6	-6.79	8	-1.79	0.0365	667	0.982	0.963	17387	1	-7.46	8	-2.02	0.0218	369	0.975	0.978	17686	0.999
UNKL	-6.78	8	-1.79	0.0368	668	0.982	0.963	17386	1	-6.94	8	-1.87	0.0305	519	0.975	0.97	17536	0.998
DEFB126	-6.78	8	-1.79	0.0368	669	0.982	0.963	17385	1	-6.8	8	-1.83	0.0333	559	0.975	0.967	17496	0.998
CRISP2	-6.77	8	-1.79	0.0369	670	0.982	0.963	17384	1	-6.63	8	-1.79	0.0369	618	0.975	0.963	17437	0.997
YAP1	-6.77	8	-1.79	0.037	671	0.982	0.963	17383	1	-4.24	8	-1.12	0.131	2157	0.975	0.869	15898	0.987
FAM46A	-6.77	8	-1.79	0.037	672	0.982	0.963	17382	1	-6.78	8	-1.83	0.0337	566	0.975	0.966	17489	0.997
GTF2E1	-6.76	8	-1.78	0.0372	673	0.982	0.963	17381	1	-3.19	8	-0.83	0.203	3393	0.975	0.797	14662	0.981
PRRG1	-6.76	8	-1.78	0.0372	674	0.982	0.963	17380	1	-5.31	8	-1.42	0.0777	1282	0.975	0.922	16773	0.992
FAM83A	-6.76	8	-1.78	0.0372	675	0.982	0.963	17379	1	-0.91	8	-0.2	0.421	7517	0.975	0.579	10538	0.977
OR4S2	-6.75	8	-1.78	0.0373	676	0.982	0.963	17378	1	-5.47	8	-1.46	0.0715	1181	0.975	0.929	16874	0.993
SLC26A3	-6.75	8	-1.78	0.0375	677	0.982	0.963	17377	1	-4.92	8	-1.31	0.0949	1562	0.975	0.905	16493	0.99
SLC5A12	-6.75	8	-1.78	0.0375	678	0.982	0.962	17376	1	-8.4	8	-2.28	0.0113	221	0.92	0.989	17834	1
SLC30A7	-6.74	8	-1.78	0.0375	679	0.982	0.962	17375	1	-5.31	8	-1.42	0.0777	1281	0.975	0.922	16774	0.992
ESRRA	-6.74	8	-1.78	0.0375	680	0.982	0.962	17374	1	-4.39	8	-1.17	0.122	2011	0.975	0.878	16044	0.988
UTP14C	-6.74	8	-1.78	0.0376	681	0.982	0.962	17373	1	-5.07	8	-1.35	0.0878	1437	0.975	0.912	16618	0.991
CXorf65	-6.74	8	-1.78	0.0376	682	0.982	0.962	17372	1	-3.41	8	-0.89	0.186	3102	0.975	0.814	14953	0.983
RARA	-6.74	8	-1.78	0.0377	683	0.982	0.962	17371	1	-10.25	8	-2.79	0.0026	78	0.603	0.997	17977	1
MAD2L2	-6.73	8	-1.78	0.0377	684	0.982	0.962	17370	1	-0.68	8	-0.13	0.447	8027	0.975	0.553	10028	0.977
HTR2B	-6.73	8	-1.78	0.0378	685	0.982	0.962	17369	1	-3.03	8	-0.79	0.216	3627	0.975	0.784	14428	0.981
TECPR1	-6.73	8	-1.78	0.0378	686	0.982	0.962	17368	1	-7.49	8	-2.03	0.0214	362	0.975	0.979	17693	0.999
C11orf73	-6.73	8	-1.78	0.0378	687	0.982	0.962	17367	1	-5.84	8	-1.57	0.0583	969	0.975	0.942	17086	0.995
SEC23B	-6.73	8	-1.78	0.0379	688	0.982	0.962	17366	1	-3.13	8	-0.81	0.208	3486	0.975	0.792	14569	0.981
EIF4E	-6.73	8	-1.78	0.0379	689	0.982	0.962	17365	1	-5.31	8	-1.42	0.0778	1283	0.975	0.922	16772	0.992
PLBD2	-6.72	8	-1.77	0.038	690	0.982	0.962	17364	1	-2.54	8	-0.65	0.257	4365	0.975	0.743	13690	0.979
ANKRD11	-6.72	8	-1.77	0.038	691	0.982	0.962	17363	1	-6.2	8	-1.67	0.0476	806	0.975	0.952	17249	0.996
CDC14B	-6.72	8	-1.77	0.0381	692	0.982	0.962	17362	1	-3.85	8	-1.01	0.155	2573	0.975	0.845	15482	0.985
FUT4	-6.72	8	-1.77	0.0381	693	0.982	0.962	17361	1	-7.17	8	-1.94	0.0263	446	0.975	0.974	17609	0.998
PTGFR	-6.72	8	-1.77	0.0382	694	0.982	0.962	17360	1	-3.93	8	-1.04	0.15	2489	0.975	0.85	15566	0.985
UAP1	-6.71	8	-1.77	0.0383	695	0.982	0.962	17359	1	-5.46	8	-1.46	0.0716	1185	0.975	0.928	16870	0.993
POU4F3	-6.7	8	-1.77	0.0385	696	0.982	0.962	17358	1	-1.04	8	-0.23	0.408	7257	0.975	0.592	10798	0.977
TNS3	-6.7	8	-1.77	0.0385	697	0.982	0.961	17357	1	-7.65	8	-2.07	0.0191	345	0.975	0.981	17710	1
NUDT18	-3.35	2	-1.77	0.0386	698	0.982	0.961	17356	1	-3.91	2	-2.12	0.0172	307	0.975	0.983	17748	1
ATP6V1C1	-6.69	8	-1.77	0.0387	699	0.982	0.961	17355	1	-3.8	8	-1	0.158	2638	0.975	0.842	15417	0.985
YWHAH	-6.69	8	-1.76	0.0388	700	0.982	0.961	17354	1	-4.77	8	-1.27	0.102	1673	0.975	0.898	16382	0.99
PLA2G15	-6.69	8	-1.76	0.0388	701	0.982	0.961	17353	1	-4.45	8	-1.18	0.119	1950	0.975	0.881	16105	0.988
SLC16A3	-6.69	8	-1.76	0.0389	702	0.982	0.961	17352	1	-8.05	8	-2.18	0.0145	268	0.975	0.985	17787	1
OR5K4	-6.68	8	-1.76	0.0391	703	0.982	0.961	17351	1	-4.17	8	-1.1	0.135	2235	0.975	0.865	15820	0.987
RPS6KB2	-6.68	8	-1.76	0.0391	704	0.982	0.961	17350	1	-3.52	8	-0.92	0.178	2964	0.975	0.822	15091	0.984
SEC22C	-6.67	8	-1.76	0.0391	705	0.982	0.961	17349	1	-7.35	8	-1.99	0.0234	396	0.975	0.977	17659	0.998
HESX1	-6.67	8	-1.76	0.0392	706	0.982	0.961	17348	1	-1.41	8	-0.34	0.368	6433	0.975	0.632	11622	0.977
ABCB6	-6.67	8	-1.76	0.0392	707	0.982	0.961	17347	1	-2.54	8	-0.65	0.258	4380	0.975	0.742	13675	0.979
NANS	-6.67	8	-1.76	0.0393	708	0.982	0.961	17346	1	-10.13	8	-2.76	0.00288	81	0.641	0.997	17974	1
GYPC	-6.66	8	-1.76	0.0394	709	0.982	0.961	17345	1	-5.19	8	-1.39	0.0827	1353	0.975	0.917	16702	0.991
DHRS13	-6.66	8	-1.76	0.0394	710	0.982	0.961	17344	1	-3.74	8	-0.98	0.163	2715	0.975	0.837	15340	0.985
LIMA1	-6.66	8	-1.76	0.0394	711	0.982	0.961	17343	1	-2.88	8	-0.75	0.228	3830	0.975	0.772	14225	0.98
PTPRG	-6.66	8	-1.76	0.0394	712	0.982	0.961	17342	1	-9.85	8	-2.68	0.00366	94	0.702	0.996	17961	1
FGL2	-6.66	8	-1.76	0.0394	713	0.982	0.961	17341	1	-2.64	8	-0.68	0.248	4203	0.975	0.752	13852	0.979
MPP6	-6.66	8	-1.76	0.0395	714	0.982	0.961	17340	1	-5.16	8	-1.38	0.084	1370	0.975	0.916	16685	0.991
CDCA7	-6.66	8	-1.76	0.0395	715	0.982	0.961	17339	1	-5.13	8	-1.37	0.0851	1390	0.975	0.915	16665	0.991
GLG1	-6.66	8	-1.76	0.0395	716	0.982	0.96	17338	1	-7.51	8	-2.03	0.0211	357	0.975	0.979	17698	0.999
PPFIA1	-6.65	8	-1.76	0.0396	717	0.982	0.96	17337	1	-3.5	8	-0.92	0.18	2996	0.975	0.82	15059	0.984
HSPBP1	-6.65	8	-1.75	0.0397	718	0.982	0.96	17336	1	-5.7	8	-1.53	0.0632	1060	0.975	0.937	16995	0.995
TPST2	-6.65	8	-1.75	0.0398	719	0.982	0.96	17335	1	-2.18	8	-0.55	0.291	4960	0.975	0.709	13095	0.978
OGN	-6.65	8	-1.75	0.0398	720	0.982	0.96	17334	1	-3.02	8	-0.78	0.216	3633	0.975	0.784	14422	0.981
MARK3	-6.64	8	-1.75	0.0399	721	0.982	0.96	17333	1	-10.67	8	-2.91	0.00179	65	0.494	0.998	17990	1
TRPM5	-6.64	8	-1.75	0.04	722	0.982	0.96	17332	1	-6.6	8	-1.78	0.0376	628	0.975	0.962	17427	0.997
KRTAP5-1	-6.64	8	-1.75	0.04	723	0.982	0.96	17331	1	-9.32	8	-2.54	0.00559	122	0.818	0.994	17933	1
BET1L	-6.63	8	-1.75	0.0401	724	0.982	0.96	17330	1	-3.27	8	-0.85	0.197	3271	0.975	0.803	14784	0.981
YWHAG	-6.63	8	-1.75	0.0401	725	0.982	0.96	17329	1	-8.84	8	-2.4	0.00812	166	0.875	0.992	17889	1
SMAD7	-6.63	8	-1.75	0.0401	726	0.982	0.96	17328	1	-0.98	8	-0.22	0.414	7373	0.975	0.586	10682	0.977
VNN3	-3.32	2	-1.75	0.0401	727	0.982	0.96	17327	1	-3.37	2	-1.82	0.0344	577	0.975	0.966	17478	0.997
SLCO2B1	-6.63	8	-1.75	0.0402	728	0.982	0.96	17326	1	-6.73	8	-1.82	0.0347	585	0.975	0.965	17470	0.997
DPF2	-6.63	8	-1.75	0.0403	729	0.982	0.96	17325	1	-4.42	8	-1.17	0.12	1980	0.975	0.88	16075	0.988
EXOSC7	-6.62	8	-1.75	0.0404	730	0.982	0.96	17324	1	-4.55	8	-1.21	0.113	1862	0.975	0.887	16193	0.989
GJC3	-6.61	8	-1.74	0.0406	731	0.982	0.959	17323	1	-8.53	8	-2.32	0.0103	202	0.91	0.99	17853	1
POLR3F	-6.61	8	-1.74	0.0407	732	0.982	0.959	17322	1	-6.65	8	-1.79	0.0365	615	0.975	0.963	17440	0.997
SIDT1	-6.61	8	-1.74	0.0407	733	0.982	0.959	17321	1	-3.81	8	-1	0.157	2620	0.975	0.843	15435	0.985
CYP2R1	-6.61	8	-1.74	0.0408	734	0.982	0.959	17320	1	-6.77	8	-1.83	0.0339	570	0.975	0.966	17485	0.997
NVL	-6.61	8	-1.74	0.0408	735	0.982	0.959	17319	1	-4.97	8	-1.33	0.0925	1512	0.975	0.908	16543	0.99
SSSCA1	-6.6	8	-1.74	0.041	736	0.982	0.959	17318	1	-2.59	8	-0.66	0.253	4302	0.975	0.747	13753	0.979
DHCR24	-6.6	8	-1.74	0.041	737	0.982	0.959	17317	1	-3.25	8	-0.85	0.198	3300	0.975	0.802	14755	0.981
ADCYAP1R1	-6.6	8	-1.74	0.041	738	0.982	0.959	17316	1	-4.13	8	-1.09	0.137	2282	0.975	0.863	15773	0.987
PSMA7	-6.59	8	-1.74	0.0411	739	0.982	0.959	17315	1	-5.38	8	-1.44	0.0751	1241	0.975	0.925	16814	0.993
DENND4A	-6.59	8	-1.74	0.0411	740	0.982	0.959	17314	1	-3.43	8	-0.9	0.185	3077	0.975	0.815	14978	0.983
NKX2-6	-6.59	8	-1.74	0.0411	741	0.982	0.959	17313	1	0.62	8	0.23	0.59	10811	0.975	0.41	7244	0.977
HEPACAM	-6.59	8	-1.74	0.0411	742	0.982	0.959	17312	1	-7.18	8	-1.94	0.0261	445	0.975	0.974	17610	0.998
PPP2R2C	-6.59	8	-1.74	0.0411	743	0.982	0.959	17311	1	-5.77	8	-1.55	0.0608	1019	0.975	0.939	17036	0.995
FAM8A1	-6.59	8	-1.74	0.0411	744	0.982	0.959	17310	1	-11.61	8	-3.17	0.000757	45	0.304	0.999	18010	1
ZNF860	-4.66	4	-1.74	0.0411	745	0.982	0.959	17309	1	-4.54	4	-1.73	0.0417	697	0.975	0.958	17358	0.997
SLC25A2	-6.59	8	-1.74	0.0411	746	0.982	0.959	17308	1	-8.86	8	-2.41	0.00798	164	0.875	0.992	17891	1
PAX3	-6.59	8	-1.74	0.0413	747	0.982	0.959	17307	1	-5.3	8	-1.42	0.0782	1285	0.975	0.922	16770	0.992
CRK	-6.58	8	-1.74	0.0413	748	0.982	0.959	17306	1	-4.84	8	-1.29	0.0987	1625	0.975	0.901	16430	0.99
USP32	-6.58	8	-1.73	0.0414	749	0.982	0.959	17305	1	-6.85	8	-1.85	0.0322	544	0.975	0.968	17511	0.998
FAM64A	-6.58	8	-1.73	0.0414	750	0.982	0.959	17304	1	-5.45	8	-1.46	0.072	1191	0.975	0.928	16864	0.993
KIAA1586	-5.7	6	-1.73	0.0415	751	0.982	0.959	17303	1	-6.44	6	-2.01	0.022	375	0.975	0.978	17680	0.999
FAM3C	-6.58	8	-1.73	0.0415	752	0.982	0.959	17302	1	-4.61	8	-1.23	0.11	1813	0.975	0.89	16242	0.989
ODF3L2	-6.57	8	-1.73	0.0415	753	0.982	0.958	17301	1	0.37	8	0.16	0.563	10268	0.975	0.437	7787	0.977
FRK	-6.57	8	-1.73	0.0416	754	0.982	0.958	17300	1	-3.87	8	-1.02	0.154	2550	0.975	0.846	15505	0.985
LSMEM2	-6.57	8	-1.73	0.0416	755	0.982	0.958	17299	1	-9.27	8	-2.52	0.00583	128	0.823	0.994	17927	1
POLR2B	-5.67	6	-1.73	0.0421	756	0.982	0.958	17298	1	-6.52	8	-1.76	0.0395	660	0.975	0.961	17395	0.997
OR8K1	-6.55	8	-1.73	0.0421	757	0.982	0.958	17297	1	-4.58	8	-1.22	0.112	1836	0.975	0.888	16219	0.989
C1orf86	-6.55	8	-1.73	0.0422	758	0.982	0.958	17296	1	-2.91	8	-0.75	0.226	3784	0.975	0.774	14271	0.98
EHD1	-6.54	8	-1.72	0.0423	759	0.982	0.958	17295	1	-6.25	8	-1.68	0.0463	788	0.975	0.954	17267	0.996
MRPS18A	-6.54	8	-1.72	0.0424	760	0.982	0.958	17294	1	-7.84	8	-2.12	0.0168	301	0.975	0.983	17754	1
HTR3C	-6.54	8	-1.72	0.0424	761	0.982	0.958	17293	1	-5.79	8	-1.56	0.06	997	0.975	0.94	17058	0.995
MOB2	-6.54	8	-1.72	0.0425	762	0.982	0.958	17292	1	-2.94	8	-0.76	0.223	3744	0.975	0.777	14311	0.98
CYP51A1	-6.53	8	-1.72	0.0426	763	0.982	0.957	17291	1	-4.92	8	-1.31	0.0948	1561	0.975	0.905	16494	0.99
MUS81	-6.53	8	-1.72	0.0426	764	0.982	0.957	17290	1	-7.34	8	-1.99	0.0235	398	0.975	0.976	17657	0.998
POLM	-6.53	8	-1.72	0.0426	765	0.982	0.957	17289	1	-5.1	8	-1.36	0.0864	1407	0.975	0.914	16648	0.991
MSH6	-6.53	8	-1.72	0.0426	766	0.982	0.957	17288	1	-4.71	8	-1.25	0.105	1729	0.975	0.895	16326	0.989
TMA7	-5.66	6	-1.72	0.0426	767	0.982	0.957	17287	1	-6.62	6	-2.07	0.0193	346	0.975	0.981	17709	1
LRRC46	-6.53	8	-1.72	0.0427	768	0.982	0.957	17286	1	-3.5	8	-0.92	0.179	2992	0.975	0.821	15063	0.984
NIPAL1	-6.53	8	-1.72	0.0427	769	0.982	0.957	17285	1	-5.12	8	-1.37	0.0857	1401	0.975	0.914	16654	0.991
B3GAT3	-6.52	8	-1.72	0.0428	770	0.982	0.957	17284	1	-4.61	8	-1.22	0.11	1817	0.975	0.89	16238	0.989
SECISBP2	-6.52	8	-1.72	0.0428	771	0.982	0.957	17283	1	-5.1	8	-1.36	0.0866	1414	0.975	0.913	16641	0.991
BFAR	-6.52	8	-1.72	0.0429	772	0.982	0.957	17282	1	-2.63	8	-0.67	0.25	4241	0.975	0.75	13814	0.979
IFRD2	-6.51	8	-1.71	0.0432	773	0.982	0.957	17281	1	-7.41	8	-2	0.0225	385	0.975	0.977	17670	0.999
FRMD1	-6.51	8	-1.71	0.0433	774	0.982	0.957	17280	1	-2.43	8	-0.62	0.268	4570	0.975	0.732	13485	0.978
OR52A5	-6.5	8	-1.71	0.0434	775	0.982	0.957	17279	0.999	-7.19	8	-1.94	0.0259	443	0.975	0.974	17612	0.998
URM1	-6.5	8	-1.71	0.0435	776	0.982	0.957	17278	0.999	-17.43	8	-4.79	8.24e-07	11	0.00135	1	18044	1
LRFN4	-6.49	8	-1.71	0.0435	777	0.982	0.956	17277	0.999	-3.67	8	-0.96	0.168	2807	0.975	0.832	15248	0.985
CHMP2B	-6.49	8	-1.71	0.0435	778	0.982	0.956	17276	0.999	-3.89	8	-1.03	0.152	2529	0.975	0.848	15526	0.985
TSEN34	-6.49	8	-1.71	0.0435	779	0.982	0.956	17275	0.999	-3.47	8	-0.91	0.182	3041	0.975	0.818	15014	0.983
DPH2	-6.49	8	-1.71	0.0436	780	0.982	0.956	17274	0.999	-5.1	8	-1.36	0.0867	1418	0.975	0.913	16637	0.991
C1GALT1	-6.49	8	-1.71	0.0436	781	0.982	0.956	17273	0.999	-6.72	8	-1.81	0.0349	587	0.975	0.965	17468	0.997
INO80	-6.49	8	-1.71	0.0437	782	0.982	0.956	17272	0.999	-6.27	8	-1.69	0.0456	767	0.975	0.954	17288	0.996
PIPOX	-6.49	8	-1.71	0.0437	783	0.982	0.956	17271	0.999	-1.96	8	-0.49	0.312	5366	0.975	0.688	12689	0.977
PCDH12	-6.49	8	-1.71	0.0437	784	0.982	0.956	17270	0.999	-2.8	8	-0.72	0.235	3955	0.975	0.765	14100	0.98
DACH1	-6.48	8	-1.71	0.0438	785	0.982	0.956	17269	0.999	-2.01	8	-0.5	0.307	5266	0.975	0.693	12789	0.977
DLG2	-6.48	8	-1.71	0.0438	786	0.982	0.956	17268	0.999	-9.07	8	-2.47	0.0068	146	0.824	0.993	17909	1
CASR	-6.48	8	-1.71	0.0438	787	0.982	0.956	17267	0.999	-2.76	8	-0.71	0.238	4035	0.975	0.762	14020	0.98
CLRN2	-6.48	8	-1.71	0.0438	788	0.982	0.956	17266	0.999	-9.35	8	-2.54	0.00547	118	0.818	0.995	17937	1
CCDC157	-6.48	8	-1.71	0.0439	789	0.982	0.956	17265	0.999	-3.74	8	-0.98	0.163	2721	0.975	0.837	15334	0.985
TMEM230	-6.48	8	-1.71	0.0439	790	0.982	0.956	17264	0.999	-4.87	8	-1.3	0.097	1594	0.975	0.903	16461	0.99
ZNF528	-6.48	8	-1.71	0.044	791	0.982	0.956	17263	0.999	-4.17	8	-1.1	0.135	2234	0.975	0.865	15821	0.987
NACAD	-6.47	8	-1.71	0.044	792	0.982	0.956	17262	0.999	-8.53	8	-2.32	0.0102	201	0.91	0.99	17854	1
NKAIN2	-6.47	8	-1.7	0.0441	793	0.982	0.956	17261	0.999	-8.5	8	-2.31	0.0105	206	0.91	0.99	17849	1
ATRN	-6.47	8	-1.7	0.0442	794	0.982	0.956	17260	0.999	-3.2	8	-0.83	0.202	3374	0.975	0.798	14681	0.981
SLC22A6	-6.47	8	-1.7	0.0442	795	0.982	0.956	17259	0.999	-8.92	8	-2.42	0.00768	160	0.866	0.992	17895	1
ZBTB2	-6.46	8	-1.7	0.0443	796	0.982	0.956	17258	0.999	-3.92	8	-1.03	0.151	2500	0.975	0.849	15555	0.985
AKIRIN2	-6.46	8	-1.7	0.0443	797	0.982	0.956	17257	0.999	-5.24	8	-1.4	0.0806	1319	0.975	0.919	16736	0.992
PDE3B	-6.46	8	-1.7	0.0444	798	0.982	0.956	17256	0.999	-7.68	8	-2.08	0.0188	340	0.975	0.981	17715	1
CCNF	-5.59	6	-1.7	0.0445	799	0.982	0.956	17255	0.999	-3.92	6	-1.2	0.115	1890	0.975	0.885	16165	0.988
MRPL38	-5.59	6	-1.7	0.0447	800	0.982	0.955	17254	0.999	1.09	6	0.41	0.658	12105	0.975	0.342	5950	0.977
AHCYL1	-6.45	8	-1.7	0.0448	801	0.982	0.955	17253	0.999	-2.56	8	-0.65	0.256	4344	0.975	0.744	13711	0.979
GPR39	-6.44	8	-1.7	0.0449	802	0.982	0.955	17252	0.999	-4.05	8	-1.07	0.142	2361	0.975	0.858	15694	0.986
MUTYH	-6.44	8	-1.69	0.0451	803	0.982	0.955	17251	0.999	-4.07	8	-1.08	0.141	2340	0.975	0.859	15715	0.987
GSG1	-6.43	8	-1.69	0.0451	804	0.982	0.955	17250	0.999	-1.42	8	-0.34	0.368	6430	0.975	0.632	11625	0.977
MTHFD2	-6.43	8	-1.69	0.0451	805	0.982	0.955	17249	0.999	-2.1	8	-0.53	0.299	5108	0.975	0.701	12947	0.978
KARS	-6.42	8	-1.69	0.0454	806	0.982	0.955	17248	0.999	-4.16	8	-1.1	0.135	2250	0.975	0.865	15805	0.987
ZNF26	-6.42	8	-1.69	0.0454	807	0.982	0.955	17247	0.999	-3.91	8	-1.03	0.151	2514	0.975	0.849	15541	0.985
BAZ2B	-6.42	8	-1.69	0.0454	808	0.982	0.955	17246	0.999	-4.88	8	-1.3	0.0964	1586	0.975	0.904	16469	0.99
CPSF4L	-6.42	8	-1.69	0.0455	809	0.982	0.955	17245	0.999	-3.54	8	-0.93	0.177	2945	0.975	0.823	15110	0.984
LRRC1	-6.42	8	-1.69	0.0455	810	0.982	0.954	17244	0.999	-4.65	8	-1.24	0.108	1779	0.975	0.892	16276	0.989
HARBI1	-6.42	8	-1.69	0.0456	811	0.982	0.954	17243	0.999	-9.26	8	-2.52	0.00589	129	0.824	0.994	17926	1
SUMF2	-6.41	8	-1.69	0.0456	812	0.982	0.954	17242	0.999	-6.39	8	-1.72	0.0425	714	0.975	0.958	17341	0.997
COMMD6	-6.41	8	-1.69	0.0456	813	0.982	0.954	17241	0.999	-4.77	8	-1.27	0.102	1671	0.975	0.898	16384	0.99
SHKBP1	-6.41	8	-1.69	0.0458	814	0.982	0.954	17240	0.999	-5.64	8	-1.51	0.0652	1103	0.975	0.935	16952	0.995
PLEKHA8	-6.41	8	-1.69	0.0459	815	0.982	0.954	17239	0.999	-6.51	8	-1.75	0.0398	666	0.975	0.96	17389	0.997
DXO	-6.4	8	-1.69	0.0459	816	0.982	0.954	17238	0.999	-3.45	8	-0.9	0.183	3058	0.975	0.817	14997	0.983
HOXA6	-6.4	8	-1.68	0.046	817	0.982	0.954	17237	0.999	-5.57	8	-1.49	0.0676	1138	0.975	0.932	16917	0.995
ZNF853	-6.4	8	-1.68	0.0461	818	0.982	0.954	17236	0.999	-3.58	8	-0.94	0.174	2908	0.975	0.826	15147	0.985
OR5W2	-6.39	8	-1.68	0.0462	819	0.982	0.954	17235	0.999	-9.87	8	-2.69	0.00359	92	0.702	0.996	17963	1
CMSS1	-6.39	8	-1.68	0.0462	820	0.982	0.954	17234	0.999	-0.84	8	-0.18	0.429	7665	0.975	0.571	10390	0.977
KRT6A	-4.52	4	-1.68	0.0463	821	0.982	0.954	17233	0.999	-0.17	4	-0.01	0.495	8934	0.975	0.505	9121	0.977
GFER	-6.38	8	-1.68	0.0464	822	0.982	0.954	17232	0.999	-2.93	8	-0.76	0.224	3753	0.975	0.776	14302	0.98
PDIA4	-6.38	8	-1.68	0.0464	823	0.982	0.954	17231	0.999	-5.8	8	-1.56	0.0598	995	0.975	0.94	17060	0.995
OGFOD1	-6.38	8	-1.68	0.0464	824	0.982	0.954	17230	0.999	-6.96	8	-1.88	0.0301	515	0.975	0.97	17540	0.998
DAB2	-6.38	8	-1.68	0.0465	825	0.982	0.954	17229	0.999	-5.85	8	-1.57	0.0579	964	0.975	0.942	17091	0.995
AP1S3	-6.38	8	-1.68	0.0467	826	0.982	0.953	17228	0.999	-6.9	8	-1.86	0.0313	529	0.975	0.969	17526	0.998
ROBO2	-6.37	8	-1.68	0.0468	827	0.982	0.953	17227	0.999	-6.19	8	-1.67	0.0479	810	0.975	0.952	17245	0.996
PHACTR2	-6.37	8	-1.68	0.0468	828	0.982	0.953	17226	0.999	-3.98	8	-1.05	0.147	2429	0.975	0.853	15626	0.986
SCRN3	-6.37	8	-1.68	0.0468	829	0.982	0.953	17225	0.999	-4.68	8	-1.24	0.107	1752	0.975	0.893	16303	0.989
SAC3D1	-6.37	8	-1.68	0.0469	830	0.982	0.953	17224	0.999	-4.28	8	-1.13	0.129	2124	0.975	0.871	15931	0.988
C2CD4A	-6.37	8	-1.68	0.0469	831	0.982	0.953	17223	0.999	-0.69	8	-0.14	0.446	8007	0.975	0.554	10048	0.977
AREL1	-6.36	8	-1.68	0.047	832	0.982	0.953	17222	0.999	-0.98	8	-0.22	0.415	7379	0.975	0.585	10676	0.977
FAM115A	-6.36	8	-1.68	0.047	833	0.982	0.953	17221	0.999	-5.35	8	-1.43	0.0759	1252	0.975	0.924	16803	0.993
CKLF	-6.36	8	-1.68	0.047	834	0.982	0.953	17220	0.999	-1.87	8	-0.46	0.321	5534	0.975	0.679	12521	0.977
RNF168	-6.36	8	-1.67	0.047	835	0.982	0.953	17219	0.999	-1.55	8	-0.38	0.354	6171	0.975	0.646	11884	0.977
DNAJB13	-6.36	8	-1.67	0.047	836	0.982	0.953	17218	0.999	-5.27	8	-1.41	0.0795	1305	0.975	0.921	16750	0.992
ARNTL	-6.36	8	-1.67	0.047	837	0.982	0.953	17217	0.999	-8.19	8	-2.22	0.0132	251	0.949	0.987	17804	1
ZFP3	-6.36	8	-1.67	0.0471	838	0.982	0.953	17216	0.999	-3.82	8	-1.01	0.157	2612	0.975	0.843	15443	0.985
DCPS	-6.36	8	-1.67	0.0471	839	0.982	0.953	17215	0.999	-6.39	8	-1.72	0.0427	724	0.975	0.957	17331	0.997
SLC35B3	-6.36	8	-1.67	0.0471	840	0.982	0.953	17214	0.999	-3.62	8	-0.95	0.171	2867	0.975	0.829	15188	0.985
BICD1	-6.36	8	-1.67	0.0472	841	0.982	0.953	17213	0.999	-5.63	8	-1.51	0.0657	1112	0.975	0.934	16943	0.995
USP29	-6.35	8	-1.67	0.0473	842	0.982	0.953	17212	0.999	-4.49	8	-1.19	0.116	1914	0.975	0.884	16141	0.988
CASKIN2	-6.35	8	-1.67	0.0473	843	0.982	0.953	17211	0.999	-9.15	8	-2.49	0.00641	139	0.824	0.994	17916	1
MYEOV2	-6.34	8	-1.67	0.0475	844	0.982	0.952	17210	0.999	-3.64	8	-0.96	0.169	2836	0.975	0.831	15219	0.985
NRDE2	-6.34	8	-1.67	0.0475	845	0.982	0.952	17209	0.999	-5.96	8	-1.6	0.0546	911	0.975	0.945	17144	0.995
CTU2	-6.34	8	-1.67	0.0476	846	0.982	0.952	17208	0.999	-13.99	8	-3.84	6.25e-05	19	0.0594	1	18036	1
SOX8	-6.34	8	-1.67	0.0477	847	0.982	0.952	17207	0.999	-4.01	8	-1.06	0.145	2395	0.975	0.855	15660	0.986
XYLT1	-6.34	8	-1.67	0.0478	848	0.982	0.952	17206	0.999	-3.46	8	-0.91	0.183	3048	0.975	0.817	15007	0.983
HSDL1	-6.33	8	-1.67	0.0478	849	0.982	0.952	17205	0.999	-4.68	8	-1.25	0.107	1751	0.975	0.893	16304	0.989
DHRS9	-6.32	8	-1.66	0.0481	850	0.982	0.952	17204	0.999	-5.5	8	-1.47	0.0701	1164	0.975	0.93	16891	0.994
YKT6	-6.32	8	-1.66	0.0481	851	0.982	0.952	17203	0.999	-1.6	8	-0.39	0.348	6065	0.975	0.652	11990	0.977
VIPR1	-6.32	8	-1.66	0.0482	852	0.982	0.952	17202	0.999	-5.18	8	-1.38	0.0831	1359	0.975	0.917	16696	0.991
IL15RA	-6.32	8	-1.66	0.0482	853	0.982	0.952	17201	0.999	-4.65	8	-1.24	0.108	1781	0.975	0.892	16274	0.989
MS4A10	-6.32	8	-1.66	0.0482	854	0.982	0.952	17200	0.999	-6.38	8	-1.72	0.0428	726	0.975	0.957	17329	0.997
OR5F1	-6.31	8	-1.66	0.0484	855	0.982	0.952	17199	0.999	-5.57	8	-1.49	0.0676	1137	0.975	0.932	16918	0.995
VAMP1	-6.31	8	-1.66	0.0484	856	0.982	0.952	17198	0.999	-4.84	8	-1.29	0.0985	1620	0.975	0.902	16435	0.99
C2orf54	-6.31	8	-1.66	0.0485	857	0.982	0.951	17197	0.999	-7.9	8	-2.14	0.0161	289	0.975	0.984	17766	1
OR8J3	-6.31	8	-1.66	0.0486	858	0.982	0.951	17196	0.999	-4.54	8	-1.21	0.114	1871	0.975	0.886	16184	0.988
NUP160	-6.3	8	-1.66	0.0486	859	0.982	0.951	17195	0.999	-1.73	8	-0.42	0.335	5802	0.975	0.665	12253	0.977
ARGLU1	-6.3	8	-1.66	0.0488	860	0.982	0.951	17194	0.999	-2.77	8	-0.71	0.238	4023	0.975	0.762	14032	0.98
CDK5R2	-6.3	8	-1.66	0.0488	861	0.982	0.951	17193	0.999	-5.79	8	-1.55	0.0601	999	0.975	0.94	17056	0.995
CAPZA1	-6.3	8	-1.66	0.0489	862	0.982	0.951	17192	0.999	-4.86	8	-1.3	0.0976	1607	0.975	0.902	16448	0.99
KCNK4	-6.29	8	-1.65	0.049	863	0.982	0.951	17191	0.999	-8.47	8	-2.3	0.0107	212	0.91	0.989	17843	1
EARS2	-6.29	8	-1.65	0.049	864	0.982	0.951	17190	0.999	0.46	8	0.18	0.573	10461	0.975	0.427	7594	0.977
NRD1	-6.29	8	-1.65	0.049	865	0.982	0.951	17189	0.999	-9.31	8	-2.53	0.00564	124	0.818	0.994	17931	1
CHTF18	-6.29	8	-1.65	0.0491	866	0.982	0.951	17188	0.999	-5.79	8	-1.55	0.0601	1000	0.975	0.94	17055	0.995
FBXW2	-6.29	8	-1.65	0.0491	867	0.982	0.951	17187	0.999	-8.01	8	-2.17	0.0149	272	0.975	0.985	17783	1
SLC43A1	-6.29	8	-1.65	0.0491	868	0.982	0.951	17186	0.999	-2.63	8	-0.68	0.249	4225	0.975	0.751	13830	0.979
SCAF1	-6.28	8	-1.65	0.0492	869	0.982	0.951	17185	0.999	-5.45	8	-1.46	0.072	1194	0.975	0.928	16861	0.993
FAM222B	-6.28	8	-1.65	0.0492	870	0.982	0.951	17184	0.999	-5.77	8	-1.55	0.0606	1013	0.975	0.939	17042	0.995
BIRC2	-6.28	8	-1.65	0.0493	871	0.982	0.951	17183	0.999	-2.48	8	-0.63	0.264	4470	0.975	0.736	13585	0.978
CRYGA	-6.28	8	-1.65	0.0493	872	0.982	0.951	17182	0.999	-7.1	8	-1.92	0.0274	466	0.975	0.973	17589	0.998
CHRND	-6.28	8	-1.65	0.0493	873	0.982	0.951	17181	0.999	-7.06	8	-1.91	0.0282	484	0.975	0.972	17571	0.998
MYZAP	-3.14	2	-1.65	0.0493	874	0.982	0.951	17180	0.999	-3.04	2	-1.63	0.0511	868	0.975	0.949	17187	0.996
ABHD14A	-6.28	8	-1.65	0.0494	875	0.982	0.951	17179	0.999	-4.24	8	-1.12	0.131	2158	0.975	0.869	15897	0.987
AQP8	-6.27	8	-1.65	0.0495	876	0.982	0.95	17178	0.999	-2.5	8	-0.64	0.261	4428	0.975	0.739	13627	0.978
TNNT1	-6.27	8	-1.65	0.0495	877	0.982	0.95	17177	0.999	-2.74	8	-0.71	0.24	4059	0.975	0.76	13996	0.98
PPP3R2	-6.27	8	-1.65	0.0497	878	0.982	0.95	17176	0.999	-5.22	8	-1.39	0.0815	1334	0.975	0.918	16721	0.992
CAV2	-6.27	8	-1.65	0.0497	879	0.982	0.95	17175	0.999	-4.62	8	-1.23	0.109	1802	0.975	0.891	16253	0.989
CCDC28B	-6.26	8	-1.65	0.0498	880	0.982	0.95	17174	0.999	-7.86	8	-2.13	0.0165	295	0.975	0.983	17760	1
DAXX	-6.26	8	-1.65	0.0499	881	0.982	0.95	17173	0.999	-2.9	8	-0.75	0.227	3806	0.975	0.773	14249	0.98
DTX3L	-6.26	8	-1.64	0.05	882	0.982	0.95	17172	0.999	-5.51	8	-1.48	0.0697	1157	0.975	0.93	16898	0.994
UVSSA	-6.25	8	-1.64	0.0501	883	0.982	0.95	17171	0.999	-2.41	8	-0.61	0.27	4592	0.975	0.73	13463	0.978
CYP2C8	-6.25	8	-1.64	0.0502	884	0.982	0.95	17170	0.999	-4.65	8	-1.24	0.108	1780	0.975	0.892	16275	0.989
MIOS	-6.25	8	-1.64	0.0502	885	0.982	0.95	17169	0.999	-5.75	8	-1.54	0.0612	1025	0.975	0.939	17030	0.995
PPFIBP2	-6.25	8	-1.64	0.0502	886	0.982	0.95	17168	0.999	-5.99	8	-1.61	0.0538	898	0.975	0.946	17157	0.996
RIMBP2	-6.24	8	-1.64	0.0503	887	0.982	0.95	17167	0.999	-4.46	8	-1.19	0.118	1944	0.975	0.882	16111	0.988
PCYT1B	-6.24	8	-1.64	0.0503	888	0.982	0.95	17166	0.999	-3.52	8	-0.92	0.178	2966	0.975	0.822	15089	0.984
CCNE2	-6.24	8	-1.64	0.0503	889	0.982	0.95	17165	0.999	-10.84	8	-2.96	0.00154	56	0.488	0.998	17999	1
SPIN4	-5.41	6	-1.64	0.0504	890	0.982	0.95	17164	0.999	-1.93	6	-0.56	0.286	4884	0.975	0.714	13171	0.978
OR5M11	-6.24	8	-1.64	0.0504	891	0.982	0.95	17163	0.999	-1.88	8	-0.47	0.321	5524	0.975	0.679	12531	0.977
RPTN	-6.24	8	-1.64	0.0505	892	0.982	0.95	17162	0.999	-4.1	8	-1.09	0.139	2307	0.975	0.861	15748	0.987
FEZF2	-6.24	8	-1.64	0.0505	893	0.982	0.95	17161	0.999	-4.89	8	-1.3	0.0963	1578	0.975	0.904	16477	0.99
VWA5B2	-6.24	8	-1.64	0.0505	894	0.982	0.95	17160	0.999	-1.92	8	-0.48	0.317	5444	0.975	0.683	12611	0.977
TNS1	-6.24	8	-1.64	0.0505	895	0.982	0.949	17159	0.999	-2.67	8	-0.69	0.246	4157	0.975	0.754	13898	0.979
RNASEH2C	-6.24	8	-1.64	0.0505	896	0.982	0.949	17158	0.999	-4.47	8	-1.19	0.117	1936	0.975	0.883	16119	0.988
STAM2	-6.24	8	-1.64	0.0506	897	0.982	0.949	17157	0.999	0.86	8	0.29	0.616	11303	0.975	0.384	6752	0.977
DHH	-6.23	8	-1.64	0.0507	898	0.982	0.949	17156	0.999	-10.08	8	-2.75	0.003	84	0.644	0.997	17971	1
CTTNBP2	-6.23	8	-1.64	0.0507	899	0.982	0.949	17155	0.999	-1.85	8	-0.46	0.324	5573	0.975	0.676	12482	0.977
LYSMD1	-6.22	8	-1.64	0.0509	900	0.982	0.949	17154	0.999	0.62	8	0.23	0.591	10812	0.975	0.409	7243	0.977
SLC6A2	-6.22	8	-1.64	0.0509	901	0.982	0.949	17153	0.999	-2.39	8	-0.61	0.271	4626	0.975	0.729	13429	0.978
APEH	-6.22	8	-1.64	0.0509	902	0.982	0.949	17152	0.999	-7.22	8	-1.95	0.0254	433	0.975	0.975	17622	0.998
ANP32D	-3.11	2	-1.64	0.0509	903	0.982	0.949	17151	0.999	-3.29	2	-1.78	0.0378	632	0.975	0.962	17423	0.997
KRT37	-6.22	8	-1.64	0.051	904	0.982	0.949	17150	0.999	-4.61	8	-1.23	0.11	1809	0.975	0.89	16246	0.989
DNPEP	-6.22	8	-1.64	0.051	905	0.982	0.949	17149	0.999	1.19	8	0.39	0.651	11962	0.975	0.349	6093	0.977
CAMK1	-6.22	8	-1.63	0.0511	906	0.982	0.949	17148	0.999	-4.94	8	-1.32	0.0937	1540	0.975	0.906	16515	0.99
PPARG	-6.22	8	-1.63	0.0511	907	0.982	0.949	17147	0.999	-10.29	8	-2.81	0.0025	76	0.588	0.997	17979	1
TXNRD1	-6.22	8	-1.63	0.0511	908	0.982	0.949	17146	0.999	-6.68	8	-1.8	0.0358	603	0.975	0.964	17452	0.997
CNBP	-6.22	8	-1.63	0.0511	909	0.982	0.949	17145	0.999	-7.09	8	-1.92	0.0277	472	0.975	0.972	17583	0.998
BCL2L14	-6.22	8	-1.63	0.0511	910	0.982	0.949	17144	0.999	-5.1	8	-1.36	0.0865	1412	0.975	0.914	16643	0.991
GLS	-6.22	8	-1.63	0.0511	911	0.982	0.949	17143	0.999	-2.25	8	-0.57	0.284	4847	0.975	0.716	13208	0.978
RNF130	-6.21	8	-1.63	0.0513	912	0.982	0.949	17142	0.999	-2.26	8	-0.57	0.284	4836	0.975	0.716	13219	0.978
TTC13	-6.21	8	-1.63	0.0514	913	0.982	0.949	17141	0.999	-5.18	8	-1.38	0.0831	1358	0.975	0.917	16697	0.991
P2RX3	-6.21	8	-1.63	0.0514	914	0.982	0.949	17140	0.999	-3.24	8	-0.84	0.199	3321	0.975	0.801	14734	0.981
LacZ	-30.08	188	-1.63	0.0515	915	0.982	0.949	17139	0.999	-39.05	188	-2.18	0.0145	267	0.975	0.986	17788	1
PGAP3	-6.2	8	-1.63	0.0515	916	0.982	0.948	17138	0.999	-5.83	8	-1.57	0.0586	974	0.975	0.941	17081	0.995
DDX47	-6.2	8	-1.63	0.0516	917	0.982	0.948	17137	0.999	-2	8	-0.5	0.308	5278	0.975	0.692	12777	0.977
KREMEN2	-6.19	8	-1.63	0.0518	918	0.982	0.948	17136	0.999	-5.35	8	-1.43	0.0762	1256	0.975	0.924	16799	0.993
ATRIP	-6.19	8	-1.63	0.052	919	0.982	0.948	17135	0.999	-6.35	8	-1.71	0.0437	738	0.975	0.956	17317	0.997
NADK2	-6.18	8	-1.63	0.052	920	0.982	0.948	17134	0.999	-0.74	8	-0.15	0.44	7897	0.975	0.56	10158	0.977
SPEF2	-6.18	8	-1.62	0.0523	921	0.982	0.948	17133	0.999	-6.41	8	-1.73	0.042	701	0.975	0.958	17354	0.997
F13B	-5.78	7	-1.62	0.0523	922	0.982	0.948	17132	0.999	-2.69	8	-0.69	0.244	4130	0.975	0.756	13925	0.98
KLHL21	-6.17	8	-1.62	0.0524	923	0.982	0.948	17131	0.999	-2.01	8	-0.5	0.307	5267	0.975	0.693	12788	0.977
P2RY2	-6.17	8	-1.62	0.0524	924	0.982	0.948	17130	0.999	-2.56	8	-0.66	0.256	4340	0.975	0.744	13715	0.979
OR9A4	-6.17	8	-1.62	0.0525	925	0.982	0.947	17129	0.999	-6.85	8	-1.85	0.0323	547	0.975	0.968	17508	0.998
TH	-6.17	8	-1.62	0.0525	926	0.982	0.947	17128	0.999	-2.73	8	-0.7	0.241	4071	0.975	0.759	13984	0.98
RAP1GAP2	-6.17	8	-1.62	0.0526	927	0.982	0.947	17127	0.999	-3.69	8	-0.97	0.166	2773	0.975	0.834	15282	0.985
TMPO	-6.16	8	-1.62	0.0529	928	0.982	0.947	17126	0.998	-2.93	8	-0.76	0.224	3760	0.975	0.776	14295	0.98
REP15	-6.15	8	-1.61	0.0532	929	0.982	0.947	17125	0.998	-1.83	8	-0.45	0.325	5610	0.975	0.675	12445	0.977
AIFM1	-6.15	8	-1.61	0.0532	930	0.982	0.947	17124	0.998	-5.52	8	-1.48	0.0696	1155	0.975	0.93	16900	0.994
MROH7	-6.14	8	-1.61	0.0532	931	0.982	0.947	17123	0.998	-5.05	8	-1.35	0.0885	1451	0.975	0.911	16604	0.991
TBC1D15	-6.13	8	-1.61	0.0535	932	0.982	0.946	17122	0.998	-9.15	8	-2.49	0.00643	141	0.824	0.994	17914	1
OR52H1	-6.13	8	-1.61	0.0536	933	0.982	0.946	17121	0.998	-5.2	8	-1.39	0.0822	1342	0.975	0.918	16713	0.991
BRPF3	-6.13	8	-1.61	0.0536	934	0.982	0.946	17120	0.998	-5.78	8	-1.55	0.0605	1012	0.975	0.939	17043	0.995
EIF4E3	-6.13	8	-1.61	0.0536	935	0.982	0.946	17119	0.998	-2.69	8	-0.69	0.244	4133	0.975	0.756	13922	0.98
EIF3M	-6.13	8	-1.61	0.0537	936	0.982	0.946	17118	0.998	-5.9	8	-1.59	0.0564	936	0.975	0.944	17119	0.995
TTC36	-6.13	8	-1.61	0.0537	937	0.982	0.946	17117	0.998	-7.39	8	-2	0.0227	387	0.975	0.977	17668	0.999
GRASP	-6.13	8	-1.61	0.0538	938	0.982	0.946	17116	0.998	-1.77	8	-0.44	0.331	5713	0.975	0.669	12342	0.977
OR8A1	-6.12	8	-1.61	0.0539	939	0.982	0.946	17115	0.998	-4.02	8	-1.06	0.144	2389	0.975	0.856	15666	0.986
KCNK13	-6.12	8	-1.61	0.054	940	0.982	0.946	17114	0.998	-1.51	8	-0.36	0.358	6244	0.975	0.642	11811	0.977
PRPS1	-6.12	8	-1.61	0.054	941	0.982	0.946	17113	0.998	-4.74	8	-1.26	0.103	1694	0.975	0.897	16361	0.989
SPTLC2	-6.12	8	-1.61	0.054	942	0.982	0.946	17112	0.998	-2.96	8	-0.77	0.221	3722	0.975	0.779	14333	0.981
ZYX	-6.12	8	-1.61	0.054	943	0.982	0.946	17111	0.998	-3.93	8	-1.04	0.15	2484	0.975	0.85	15571	0.985
FAR2	-6.12	8	-1.61	0.0541	944	0.982	0.946	17110	0.998	-5.61	8	-1.5	0.0664	1122	0.975	0.934	16933	0.995
RAB1A	-6.11	8	-1.61	0.0542	945	0.982	0.946	17109	0.998	-2.02	8	-0.51	0.307	5254	0.975	0.693	12801	0.977
ANKK1	-6.11	8	-1.61	0.0542	946	0.982	0.946	17108	0.998	-6.09	8	-1.64	0.0508	861	0.975	0.949	17194	0.996
DIDO1	-6.11	8	-1.61	0.0542	947	0.982	0.946	17107	0.998	-4.71	8	-1.26	0.105	1723	0.975	0.895	16332	0.989
MOSPD2	-6.11	8	-1.6	0.0543	948	0.982	0.946	17106	0.998	-3.88	8	-1.02	0.153	2541	0.975	0.847	15514	0.985
RAET1L	-3.05	2	-1.6	0.0543	949	0.982	0.946	17105	0.998	-1.7	2	-0.89	0.186	3107	0.975	0.814	14948	0.983
FOXL2	-6.1	8	-1.6	0.0544	950	0.982	0.946	17104	0.998	-5.66	8	-1.52	0.0644	1085	0.975	0.936	16970	0.995
HK2	-6.1	8	-1.6	0.0545	951	0.982	0.946	17103	0.998	-5.72	8	-1.53	0.0625	1048	0.975	0.937	17007	0.995
KCNK16	-6.1	8	-1.6	0.0545	952	0.982	0.946	17102	0.998	-0.62	8	-0.12	0.454	8126	0.975	0.546	9929	0.977
CYP2C19	-5.28	6	-1.6	0.0546	953	0.982	0.945	17101	0.998	-1.41	6	-0.4	0.346	6012	0.975	0.654	12043	0.977
C12orf36	-6.09	8	-1.6	0.0548	954	0.982	0.945	17100	0.998	-4.19	8	-1.11	0.134	2212	0.975	0.866	15843	0.987
OR3A1	-6.09	8	-1.6	0.0548	955	0.982	0.945	17099	0.998	-3.83	8	-1.01	0.156	2600	0.975	0.844	15455	0.985
DNAJC14	-6.09	8	-1.6	0.0549	956	0.982	0.945	17098	0.998	-3.67	8	-0.96	0.168	2806	0.975	0.832	15249	0.985
ZADH2	-6.09	8	-1.6	0.0549	957	0.982	0.945	17097	0.998	-3.11	8	-0.81	0.209	3513	0.975	0.791	14542	0.981
PSMD7	-6.09	8	-1.6	0.055	958	0.982	0.945	17096	0.998	-4.5	8	-1.2	0.116	1910	0.975	0.884	16145	0.988
TPPP	-6.09	8	-1.6	0.055	959	0.982	0.945	17095	0.998	-6.15	8	-1.65	0.0491	829	0.975	0.951	17226	0.996
CUL7	-6.09	8	-1.6	0.055	960	0.982	0.945	17094	0.998	-4.53	8	-1.2	0.114	1876	0.975	0.886	16179	0.988
TBC1D22B	-6.09	8	-1.6	0.055	961	0.982	0.945	17093	0.998	-4.59	8	-1.22	0.111	1832	0.975	0.889	16223	0.989
UBALD1	-6.08	8	-1.6	0.0551	962	0.982	0.945	17092	0.998	-5.91	8	-1.59	0.0561	933	0.975	0.944	17122	0.995
ZNF652	-6.08	8	-1.6	0.0552	963	0.982	0.945	17091	0.998	-6.53	8	-1.76	0.0391	651	0.975	0.961	17404	0.997
CDCP1	-6.08	8	-1.6	0.0552	964	0.982	0.945	17090	0.998	-4.32	8	-1.14	0.126	2091	0.975	0.874	15964	0.988
HMGCS1	-6.07	8	-1.59	0.0554	965	0.982	0.945	17089	0.998	-6.15	8	-1.66	0.0489	827	0.975	0.951	17228	0.996
COPB1	-6.07	8	-1.59	0.0555	966	0.982	0.945	17088	0.998	-6.97	8	-1.88	0.0299	513	0.975	0.97	17542	0.998
NEK9	-6.07	8	-1.59	0.0555	967	0.982	0.945	17087	0.998	-8.5	8	-2.31	0.0105	207	0.91	0.989	17848	1
SEC61B	-6.07	8	-1.59	0.0555	968	0.982	0.944	17086	0.998	-4.97	8	-1.33	0.0922	1510	0.975	0.908	16545	0.991
RAD54B	-6.07	8	-1.59	0.0555	969	0.982	0.944	17085	0.998	-5.96	8	-1.6	0.0545	908	0.975	0.945	17147	0.995
SMLR1	-6.07	8	-1.59	0.0556	970	0.982	0.944	17084	0.998	-3.27	8	-0.85	0.197	3279	0.975	0.803	14776	0.981
FAM208B	-6.07	8	-1.59	0.0556	971	0.982	0.944	17083	0.998	-6.92	8	-1.87	0.0308	523	0.975	0.969	17532	0.998
SYT7	-6.07	8	-1.59	0.0556	972	0.982	0.944	17082	0.998	-1.74	8	-0.43	0.335	5785	0.975	0.665	12270	0.977
ACSM2B	-6.06	8	-1.59	0.0558	973	0.982	0.944	17081	0.998	-4.87	8	-1.3	0.0971	1597	0.975	0.903	16458	0.99
STARD10	-6.06	8	-1.59	0.0559	974	0.982	0.944	17080	0.998	-2.69	8	-0.69	0.244	4128	0.975	0.756	13927	0.98
RELN	-6.06	8	-1.59	0.0559	975	0.982	0.944	17079	0.998	-3.46	8	-0.91	0.182	3045	0.975	0.818	15010	0.983
TANC2	-6.06	8	-1.59	0.0559	976	0.982	0.944	17078	0.998	-6.39	8	-1.72	0.0425	715	0.975	0.957	17340	0.997
KRT34	-6.06	8	-1.59	0.056	977	0.982	0.944	17077	0.998	-4.34	8	-1.15	0.125	2067	0.975	0.875	15988	0.988
IL22RA2	-6.06	8	-1.59	0.056	978	0.982	0.944	17076	0.998	-4.88	8	-1.3	0.0967	1590	0.975	0.903	16465	0.99
CYP4F11	-6.05	8	-1.59	0.0561	979	0.982	0.944	17075	0.998	-3.62	8	-0.95	0.171	2874	0.975	0.829	15181	0.985
SPACA7	-6.05	8	-1.59	0.0561	980	0.982	0.944	17074	0.998	-2.75	8	-0.71	0.239	4041	0.975	0.761	14014	0.98
KLHL7	-6.05	8	-1.59	0.0561	981	0.982	0.944	17073	0.998	-5.76	8	-1.55	0.061	1023	0.975	0.939	17032	0.995
COX7A2	-6.05	8	-1.59	0.0561	982	0.982	0.944	17072	0.998	-4.97	8	-1.33	0.0922	1508	0.975	0.908	16547	0.991
KLRC1	-6.05	8	-1.59	0.0563	983	0.982	0.944	17071	0.998	-2.36	8	-0.6	0.275	4686	0.975	0.725	13369	0.978
VPS13C	-6.04	8	-1.59	0.0564	984	0.982	0.944	17070	0.998	-6.75	8	-1.82	0.0343	574	0.975	0.966	17481	0.997
KITLG	-6.04	8	-1.58	0.0565	985	0.982	0.943	17069	0.998	-1.43	8	-0.34	0.366	6397	0.975	0.634	11658	0.977
AIP	-6.03	8	-1.58	0.0566	986	0.982	0.943	17068	0.998	-4.06	8	-1.07	0.142	2348	0.975	0.858	15707	0.987
CDKN2A	-6.03	8	-1.58	0.0566	987	0.982	0.943	17067	0.998	-5.15	8	-1.38	0.0845	1377	0.975	0.916	16678	0.991
C11orf88	-6.03	8	-1.58	0.0567	988	0.982	0.943	17066	0.998	-5.7	8	-1.53	0.063	1056	0.975	0.937	16999	0.995
ARMC7	-6.03	8	-1.58	0.0567	989	0.982	0.943	17065	0.998	-6.41	8	-1.73	0.042	700	0.975	0.958	17355	0.997
KAT5	-6.03	8	-1.58	0.0568	990	0.982	0.943	17064	0.998	-6.27	8	-1.69	0.0457	768	0.975	0.954	17287	0.996
TRABD2B	-6.03	8	-1.58	0.0568	991	0.982	0.943	17063	0.998	-5.64	8	-1.51	0.0651	1102	0.975	0.935	16953	0.995
KCNE4	-4.26	4	-1.58	0.0569	992	0.982	0.943	17062	0.998	-0.89	4	-0.29	0.385	6814	0.975	0.615	11241	0.977
CHST12	-6.03	8	-1.58	0.0569	993	0.982	0.943	17061	0.998	-4.47	8	-1.19	0.118	1938	0.975	0.882	16117	0.988
EBLN2	-6.03	8	-1.58	0.0569	994	0.982	0.943	17060	0.998	-6.39	8	-1.72	0.0426	720	0.975	0.957	17335	0.997
KRTAP5-2	-4.26	4	-1.58	0.0569	995	0.982	0.943	17059	0.998	-2.5	4	-0.93	0.177	2950	0.975	0.823	15105	0.984
ZMYND10	-6.02	8	-1.58	0.057	996	0.982	0.943	17058	0.998	-3.94	8	-1.04	0.15	2474	0.975	0.85	15581	0.985
SAAL1	-6.02	8	-1.58	0.0571	997	0.982	0.943	17057	0.998	-8.6	8	-2.34	0.00972	194	0.896	0.99	17861	1
DFNB31	-6.01	8	-1.58	0.0573	998	0.982	0.943	17056	0.998	-6.35	8	-1.71	0.0437	739	0.975	0.956	17316	0.997
CPA5	-6.01	8	-1.58	0.0573	999	0.982	0.943	17055	0.998	-2.39	8	-0.61	0.272	4632	0.975	0.728	13423	0.978
FCGBP	-6.01	8	-1.58	0.0574	1000	0.982	0.943	17054	0.998	-5.41	8	-1.45	0.0737	1221	0.975	0.926	16834	0.993
TMEM127	-6.01	8	-1.58	0.0574	1001	0.982	0.943	17053	0.998	-3.36	8	-0.88	0.19	3168	0.975	0.81	14887	0.982
PTH	-6.01	8	-1.58	0.0574	1002	0.982	0.943	17052	0.998	-4.28	8	-1.13	0.128	2120	0.975	0.872	15935	0.988
TMEM196	-6.01	8	-1.58	0.0574	1003	0.982	0.943	17051	0.998	-7.77	8	-2.11	0.0176	315	0.975	0.982	17740	1
FAM110A	-6.01	8	-1.58	0.0575	1004	0.982	0.943	17050	0.998	-6.31	8	-1.7	0.0447	747	0.975	0.955	17308	0.996
LCNL1	-6.01	8	-1.58	0.0575	1005	0.982	0.942	17049	0.998	-3.24	8	-0.85	0.199	3313	0.975	0.801	14742	0.981
TOR1A	-6	8	-1.58	0.0576	1006	0.982	0.942	17048	0.998	-1.54	8	-0.37	0.355	6194	0.975	0.645	11861	0.977
INPP4A	-6	8	-1.57	0.0577	1007	0.982	0.942	17047	0.998	-4.96	8	-1.32	0.0928	1521	0.975	0.907	16534	0.99
ZC3H12B	-6	8	-1.57	0.0577	1008	0.982	0.942	17046	0.998	-2.77	8	-0.71	0.237	4012	0.975	0.763	14043	0.98
SLC51A	-6	8	-1.57	0.0578	1009	0.982	0.942	17045	0.998	0	8	0.06	0.523	9483	0.975	0.477	8572	0.977
LAMA1	-6	8	-1.57	0.0579	1010	0.982	0.942	17044	0.998	-7.13	8	-1.93	0.027	459	0.975	0.973	17596	0.998
DNAJC18	-5.99	8	-1.57	0.058	1011	0.982	0.942	17043	0.998	-2.38	8	-0.61	0.272	4640	0.975	0.728	13415	0.978
CYTH4	-5.99	8	-1.57	0.0581	1012	0.982	0.942	17042	0.998	-3.65	8	-0.96	0.169	2829	0.975	0.831	15226	0.985
NUDT12	-5.99	8	-1.57	0.0581	1013	0.982	0.942	17041	0.998	-4.11	8	-1.09	0.139	2304	0.975	0.861	15751	0.987
ARHGAP19	-5.99	8	-1.57	0.0582	1014	0.982	0.942	17040	0.998	-1.99	8	-0.5	0.309	5304	0.975	0.691	12751	0.977
CCDC64B	-5.98	8	-1.57	0.0582	1015	0.982	0.942	17039	0.998	-2.91	8	-0.75	0.225	3781	0.975	0.775	14274	0.98
UBA1	-5.98	8	-1.57	0.0583	1016	0.982	0.942	17038	0.998	-6.26	8	-1.68	0.0461	779	0.975	0.954	17276	0.996
CD151	-5.98	8	-1.57	0.0583	1017	0.982	0.942	17037	0.998	-6.28	8	-1.69	0.0456	765	0.975	0.954	17290	0.996
GEMIN6	-5.98	8	-1.57	0.0584	1018	0.982	0.942	17036	0.998	-6.76	8	-1.83	0.034	571	0.975	0.966	17484	0.997
CACNA1F	-5.97	8	-1.57	0.0586	1019	0.982	0.941	17035	0.998	-1.16	8	-0.27	0.395	7003	0.975	0.605	11052	0.977
ADCY2	-5.97	8	-1.57	0.0587	1020	0.982	0.941	17034	0.998	-4.33	8	-1.15	0.126	2084	0.975	0.874	15971	0.988
TTYH1	-5.97	8	-1.57	0.0587	1021	0.982	0.941	17033	0.998	-5.43	8	-1.46	0.0728	1209	0.975	0.927	16846	0.993
ERBB2	-5.97	8	-1.56	0.0588	1022	0.982	0.941	17032	0.998	-3.8	8	-1	0.159	2645	0.975	0.841	15410	0.985
RAD9B	-5.96	8	-1.56	0.0589	1023	0.982	0.941	17031	0.998	-3.15	8	-0.82	0.206	3450	0.975	0.794	14605	0.981
C11orf42	-5.96	8	-1.56	0.0589	1024	0.982	0.941	17030	0.998	-1.02	8	-0.23	0.41	7281	0.975	0.59	10774	0.977
CHST1	-5.96	8	-1.56	0.059	1025	0.982	0.941	17029	0.998	-3.52	8	-0.92	0.178	2979	0.975	0.822	15076	0.984
SLC9A3R1	-5.96	8	-1.56	0.0591	1026	0.982	0.941	17028	0.998	-4.69	8	-1.25	0.106	1742	0.975	0.894	16313	0.989
NAALAD2	-5.95	8	-1.56	0.0592	1027	0.982	0.941	17027	0.998	-6.56	8	-1.77	0.0384	637	0.975	0.962	17418	0.997
TRPC6	-5.95	8	-1.56	0.0592	1028	0.982	0.941	17026	0.998	-8.66	8	-2.35	0.00934	186	0.896	0.991	17869	1
LRRC70	-5.95	8	-1.56	0.0593	1029	0.982	0.941	17025	0.997	-5.33	8	-1.43	0.0768	1265	0.975	0.923	16790	0.993
PSMB8	-5.95	8	-1.56	0.0594	1030	0.982	0.941	17024	0.997	-5.59	8	-1.5	0.0669	1131	0.975	0.933	16924	0.995
CNTN3	-5.95	8	-1.56	0.0594	1031	0.982	0.941	17023	0.997	-6.48	8	-1.75	0.0404	674	0.975	0.96	17381	0.997
HOXC13	-5.56	7	-1.56	0.0594	1032	0.982	0.941	17022	0.997	-5.06	8	-1.35	0.0881	1445	0.975	0.912	16610	0.991
DSN1	-5.56	7	-1.56	0.0595	1033	0.982	0.941	17021	0.997	-4.66	8	-1.24	0.107	1763	0.975	0.893	16292	0.989
BMPER	-5.94	8	-1.56	0.0596	1034	0.982	0.94	17020	0.997	-6.81	8	-1.84	0.033	558	0.975	0.967	17497	0.998
ZFP37	-5.94	8	-1.56	0.0597	1035	0.982	0.94	17019	0.997	-2.67	8	-0.69	0.246	4151	0.975	0.754	13904	0.979
MAGEH1	-5.94	8	-1.56	0.0597	1036	0.982	0.94	17018	0.997	-6.24	8	-1.68	0.0466	791	0.975	0.953	17264	0.996
TPBGL	-5.94	8	-1.56	0.0598	1037	0.982	0.94	17017	0.997	-3.01	8	-0.78	0.217	3651	0.975	0.783	14404	0.981
CMIP	-5.94	8	-1.56	0.0598	1038	0.982	0.94	17016	0.997	-9.13	8	-2.48	0.00652	142	0.824	0.993	17913	1
GLYCTK	-5.93	8	-1.56	0.0599	1039	0.982	0.94	17015	0.997	-3.81	8	-1	0.158	2622	0.975	0.842	15433	0.985
FAM76A	-5.93	8	-1.56	0.0599	1040	0.982	0.94	17014	0.997	-6.47	8	-1.74	0.0407	680	0.975	0.959	17375	0.997
SNX11	-5.93	8	-1.55	0.06	1041	0.982	0.94	17013	0.997	-4.66	8	-1.24	0.108	1773	0.975	0.892	16282	0.989
MRPL54	-5.93	8	-1.55	0.06	1042	0.982	0.94	17012	0.997	-1.14	8	-0.26	0.397	7048	0.975	0.603	11007	0.977
CYB5A	-5.93	8	-1.55	0.0601	1043	0.982	0.94	17011	0.997	-4.26	8	-1.13	0.129	2138	0.975	0.871	15917	0.987
DDX10	-5.93	8	-1.55	0.0601	1044	0.982	0.94	17010	0.997	-6.02	8	-1.62	0.0529	892	0.975	0.947	17163	0.996
MYOD1	-5.92	8	-1.55	0.0602	1045	0.982	0.94	17009	0.997	-3.61	8	-0.95	0.171	2876	0.975	0.829	15179	0.985
MAP4	-5.92	8	-1.55	0.0603	1046	0.982	0.94	17008	0.997	-7.58	8	-2.05	0.0201	352	0.975	0.98	17703	0.999
TMPRSS4	-5.92	8	-1.55	0.0603	1047	0.982	0.94	17007	0.997	-4.95	8	-1.32	0.0933	1530	0.975	0.907	16525	0.99
PGAP1	-5.92	8	-1.55	0.0603	1048	0.982	0.94	17006	0.997	-4.06	8	-1.07	0.142	2351	0.975	0.858	15704	0.987
RACGAP1	-5.92	8	-1.55	0.0603	1049	0.982	0.94	17005	0.997	-1.4	8	-0.33	0.369	6458	0.975	0.631	11597	0.977
WBP4	-5.92	8	-1.55	0.0604	1050	0.982	0.94	17004	0.997	-2.14	8	-0.54	0.295	5034	0.975	0.705	13021	0.978
TFAP2B	-5.92	8	-1.55	0.0604	1051	0.982	0.94	17003	0.997	-1.51	8	-0.36	0.358	6239	0.975	0.642	11816	0.977
STAT5A	-5.91	8	-1.55	0.0605	1052	0.982	0.94	17002	0.997	-6.86	8	-1.85	0.032	539	0.975	0.968	17516	0.998
CREBZF	-5.91	8	-1.55	0.0605	1053	0.982	0.94	17001	0.997	-9.77	8	-2.66	0.0039	96	0.733	0.996	17959	1
USP4	-5.91	8	-1.55	0.0605	1054	0.982	0.939	17000	0.997	-5.19	8	-1.39	0.0825	1346	0.975	0.918	16709	0.991
CCL13	-5.91	8	-1.55	0.0605	1055	0.982	0.939	16999	0.997	-5.83	8	-1.57	0.0587	976	0.975	0.941	17079	0.995
FAM207A	-5.91	8	-1.55	0.0607	1056	0.982	0.939	16998	0.997	-2.94	8	-0.76	0.223	3746	0.975	0.777	14309	0.98
IL17RE	-5.91	8	-1.55	0.0608	1057	0.982	0.939	16997	0.997	-4.01	8	-1.06	0.145	2397	0.975	0.855	15658	0.986
DENND6B	-5.91	8	-1.55	0.0608	1058	0.982	0.939	16996	0.997	-2.23	8	-0.57	0.286	4878	0.975	0.714	13177	0.978
ZCWPW2	-5.9	8	-1.55	0.0609	1059	0.982	0.939	16995	0.997	-5.75	8	-1.54	0.0615	1029	0.975	0.939	17026	0.995
NUP50	-5.9	8	-1.55	0.0609	1060	0.982	0.939	16994	0.997	-2.25	8	-0.57	0.285	4862	0.975	0.715	13193	0.978
TUBGCP6	-5.9	8	-1.55	0.061	1061	0.982	0.939	16993	0.997	-3.93	8	-1.04	0.15	2486	0.975	0.85	15569	0.985
HOXD12	-5.9	8	-1.55	0.061	1062	0.982	0.939	16992	0.997	-5.23	8	-1.4	0.0811	1325	0.975	0.919	16730	0.992
GDPD4	-5.9	8	-1.55	0.0611	1063	0.982	0.939	16991	0.997	-5.13	8	-1.37	0.0851	1389	0.975	0.915	16666	0.991
C17orf78	-5.9	8	-1.55	0.0611	1064	0.982	0.939	16990	0.997	-4.14	8	-1.09	0.137	2273	0.975	0.863	15782	0.987
KL	-5.89	8	-1.55	0.0612	1065	0.982	0.939	16989	0.997	-1.73	8	-0.42	0.336	5803	0.975	0.664	12252	0.977
TBC1D24	-5.89	8	-1.54	0.0612	1066	0.982	0.939	16988	0.997	-2.25	8	-0.57	0.285	4851	0.975	0.715	13204	0.978
UBLCP1	-5.89	8	-1.54	0.0613	1067	0.982	0.939	16987	0.997	-7.96	8	-2.16	0.0155	284	0.975	0.984	17771	1
NDC1	-5.89	8	-1.54	0.0613	1068	0.982	0.939	16986	0.997	-8.15	8	-2.21	0.0136	258	0.949	0.986	17797	1
BCKDHA	-5.89	8	-1.54	0.0614	1069	0.982	0.939	16985	0.997	-3.27	8	-0.85	0.197	3273	0.975	0.803	14782	0.981
INHA	-5.88	8	-1.54	0.0616	1070	0.982	0.938	16984	0.997	-7.68	8	-2.08	0.0188	339	0.975	0.981	17716	1
MSRB1	-5.88	8	-1.54	0.0617	1071	0.982	0.938	16983	0.997	-1.9	8	-0.47	0.318	5472	0.975	0.682	12583	0.977
LDHA	-5.09	6	-1.54	0.0618	1072	0.982	0.938	16982	0.997	-5.04	6	-1.56	0.0589	980	0.975	0.941	17075	0.995
FAM134C	-5.87	8	-1.54	0.062	1073	0.982	0.938	16981	0.997	-3.51	8	-0.92	0.179	2986	0.975	0.821	15069	0.984
TCP11L2	-5.87	8	-1.54	0.062	1074	0.982	0.938	16980	0.997	-10.55	8	-2.88	0.00199	70	0.514	0.998	17985	1
EIF2S3	-5.87	8	-1.54	0.0621	1075	0.982	0.938	16979	0.997	-4.93	8	-1.31	0.0944	1557	0.975	0.906	16498	0.99
ALG5	-5.87	8	-1.54	0.0621	1076	0.982	0.938	16978	0.997	-6.27	8	-1.69	0.0458	770	0.975	0.954	17285	0.996
PCLO	-5.87	8	-1.54	0.0621	1077	0.982	0.938	16977	0.997	-6.38	8	-1.72	0.043	727	0.975	0.957	17328	0.997
CETN3	-5.87	8	-1.54	0.0621	1078	0.982	0.938	16976	0.997	-6.49	8	-1.75	0.0402	672	0.975	0.96	17383	0.997
SMS	-5.86	8	-1.54	0.0622	1079	0.982	0.938	16975	0.997	-7.07	8	-1.91	0.028	479	0.975	0.972	17576	0.998
HNMT	-5.86	8	-1.54	0.0623	1080	0.982	0.938	16974	0.997	-4.77	8	-1.27	0.102	1669	0.975	0.898	16386	0.99
OGFOD2	-5.86	8	-1.54	0.0623	1081	0.982	0.938	16973	0.997	-4.83	8	-1.29	0.0988	1628	0.975	0.901	16427	0.99
KIF18B	-5.86	8	-1.53	0.0624	1082	0.982	0.938	16972	0.997	-3.75	8	-0.99	0.162	2699	0.975	0.838	15356	0.985
DMRTA1	-5.85	8	-1.53	0.0625	1083	0.982	0.937	16971	0.997	-2.27	8	-0.58	0.282	4812	0.975	0.718	13243	0.978
TP53AIP1	-5.85	8	-1.53	0.0625	1084	0.982	0.937	16970	0.997	-1.72	8	-0.42	0.336	5807	0.975	0.664	12248	0.977
RALA	-5.85	8	-1.53	0.0625	1085	0.982	0.937	16969	0.997	-4.7	8	-1.25	0.105	1735	0.975	0.895	16320	0.989
DIS3L	-5.85	8	-1.53	0.0626	1086	0.982	0.937	16968	0.997	-4.7	8	-1.25	0.106	1740	0.975	0.894	16315	0.989
ITPKC	-5.85	8	-1.53	0.0627	1087	0.982	0.937	16967	0.997	-6.43	8	-1.73	0.0417	696	0.975	0.958	17359	0.997
SLAIN2	-5.85	8	-1.53	0.0627	1088	0.982	0.937	16966	0.997	-4.94	8	-1.32	0.0938	1542	0.975	0.906	16513	0.99
RGL4	-5.85	8	-1.53	0.0627	1089	0.982	0.937	16965	0.997	-0.42	8	-0.06	0.476	8546	0.975	0.524	9509	0.977
VILL	-5.85	8	-1.53	0.0627	1090	0.982	0.937	16964	0.997	-2.65	8	-0.68	0.248	4190	0.975	0.752	13865	0.979
KIAA1407	-5.84	8	-1.53	0.0629	1091	0.982	0.937	16963	0.997	-7.74	8	-2.1	0.0181	323	0.975	0.982	17732	1
MAP3K12	-5.84	8	-1.53	0.063	1092	0.982	0.937	16962	0.997	-8.22	8	-2.23	0.0128	240	0.949	0.987	17815	1
C15orf59	-5.84	8	-1.53	0.063	1093	0.982	0.937	16961	0.997	-3.93	8	-1.04	0.15	2482	0.975	0.85	15573	0.985
RAB19	-5.84	8	-1.53	0.063	1094	0.982	0.937	16960	0.997	-3.82	8	-1.01	0.157	2619	0.975	0.843	15436	0.985
SLC9A8	-5.84	8	-1.53	0.063	1095	0.982	0.937	16959	0.997	-2.71	8	-0.7	0.243	4106	0.975	0.757	13949	0.98
PRODH	-5.83	8	-1.53	0.0632	1096	0.982	0.937	16958	0.997	-3.15	8	-0.82	0.206	3449	0.975	0.794	14606	0.981
UTP23	-5.83	8	-1.53	0.0632	1097	0.982	0.937	16957	0.997	-4.17	8	-1.1	0.135	2240	0.975	0.865	15815	0.987
PPP1CC	-5.83	8	-1.53	0.0632	1098	0.982	0.937	16956	0.997	-7.41	8	-2.01	0.0225	384	0.975	0.978	17671	0.999
MAGED1	-5.83	8	-1.53	0.0632	1099	0.982	0.937	16955	0.997	-2.43	8	-0.62	0.268	4565	0.975	0.732	13490	0.978
KCNH5	-5.83	8	-1.53	0.0633	1100	0.982	0.937	16954	0.997	-2.74	8	-0.71	0.24	4061	0.975	0.76	13994	0.98
CNST	-5.83	8	-1.53	0.0634	1101	0.982	0.937	16953	0.997	-2.17	8	-0.55	0.292	4978	0.975	0.708	13077	0.978
IL4R	-5.83	8	-1.53	0.0634	1102	0.982	0.937	16952	0.997	-5.04	8	-1.35	0.089	1459	0.975	0.911	16596	0.991
DR1	-5.83	8	-1.53	0.0635	1103	0.982	0.937	16951	0.997	-4.05	8	-1.07	0.142	2362	0.975	0.858	15693	0.986
ANAPC10	-5.82	8	-1.53	0.0636	1104	0.982	0.936	16950	0.997	-5.31	8	-1.42	0.0776	1279	0.975	0.922	16776	0.992
BIN1	-5.82	8	-1.53	0.0636	1105	0.982	0.936	16949	0.997	-5.54	8	-1.48	0.0689	1148	0.975	0.931	16907	0.994
CCDC138	-5.82	8	-1.52	0.0636	1106	0.982	0.936	16948	0.997	-2.78	8	-0.72	0.236	3984	0.975	0.764	14071	0.98
TMEM194B	-5.81	8	-1.52	0.0639	1107	0.982	0.936	16947	0.997	-2.77	8	-0.71	0.238	4020	0.975	0.762	14035	0.98
ALX3	-5.81	8	-1.52	0.0639	1108	0.982	0.936	16946	0.997	-3.92	8	-1.03	0.15	2495	0.975	0.85	15560	0.985
MRPS31	-5.81	8	-1.52	0.064	1109	0.982	0.936	16945	0.997	-2.57	8	-0.66	0.255	4328	0.975	0.745	13727	0.979
TNK1	-5.81	8	-1.52	0.064	1110	0.982	0.936	16944	0.997	-5.65	8	-1.52	0.0647	1090	0.975	0.935	16965	0.995
MAGIX	-5.81	8	-1.52	0.064	1111	0.982	0.936	16943	0.997	-4.83	8	-1.29	0.0991	1630	0.975	0.901	16425	0.99
DAGLB	-5.81	8	-1.52	0.0642	1112	0.982	0.936	16942	0.997	-6.75	8	-1.82	0.0343	575	0.975	0.966	17480	0.997
MTMR14	-5.8	8	-1.52	0.0642	1113	0.982	0.936	16941	0.997	-5.41	8	-1.45	0.0738	1224	0.975	0.926	16831	0.993
OR51E1	-5.8	8	-1.52	0.0642	1114	0.982	0.936	16940	0.997	-6.28	8	-1.69	0.0454	761	0.975	0.955	17294	0.996
CLPTM1	-5.8	8	-1.52	0.0642	1115	0.982	0.936	16939	0.997	-6.36	8	-1.71	0.0434	734	0.975	0.957	17321	0.997
SUPT16H	-5.8	8	-1.52	0.0642	1116	0.982	0.936	16938	0.997	-3.69	8	-0.97	0.166	2776	0.975	0.834	15279	0.985
ZNF638	-5.8	8	-1.52	0.0642	1117	0.982	0.936	16937	0.997	-4.26	8	-1.13	0.13	2142	0.975	0.87	15913	0.987
OR52E8	-5.8	8	-1.52	0.0643	1118	0.982	0.936	16936	0.997	-5.88	8	-1.58	0.0571	948	0.975	0.943	17107	0.995
CHCHD5	-5.8	8	-1.52	0.0643	1119	0.982	0.936	16935	0.997	-2.63	8	-0.68	0.25	4233	0.975	0.75	13822	0.979
ZCCHC9	-5.8	8	-1.52	0.0644	1120	0.982	0.936	16934	0.997	-7.03	8	-1.9	0.0288	493	0.975	0.971	17562	0.998
GPR22	-5.8	8	-1.52	0.0645	1121	0.982	0.935	16933	0.997	-5.46	8	-1.46	0.0718	1188	0.975	0.928	16867	0.993
CCDC174	-5.8	8	-1.52	0.0645	1122	0.982	0.935	16932	0.997	-2.76	8	-0.71	0.238	4031	0.975	0.762	14024	0.98
KLHL6	-5.02	6	-1.52	0.0646	1123	0.982	0.935	16931	0.997	-4.91	6	-1.52	0.0641	1075	0.975	0.936	16980	0.995
CD59	-5.79	8	-1.52	0.0646	1124	0.982	0.935	16930	0.997	-5.66	8	-1.52	0.0643	1081	0.975	0.936	16974	0.995
CDC42EP1	-5.79	8	-1.52	0.0646	1125	0.982	0.935	16929	0.997	-4.95	8	-1.32	0.0931	1527	0.975	0.907	16528	0.99
ZNF579	-5.79	8	-1.52	0.0647	1126	0.982	0.935	16928	0.997	-4.42	8	-1.17	0.12	1981	0.975	0.88	16074	0.988
MLKL	-5.79	8	-1.52	0.0647	1127	0.982	0.935	16927	0.997	-4.15	8	-1.1	0.136	2257	0.975	0.864	15798	0.987
PCDHA10	-5.79	8	-1.52	0.0648	1128	0.982	0.935	16926	0.997	-6.18	8	-1.66	0.0481	812	0.975	0.952	17243	0.996
CASC3	-5.79	8	-1.52	0.0648	1129	0.982	0.935	16925	0.997	-0.83	8	-0.18	0.43	7682	0.975	0.57	10373	0.977
IL11	-5.79	8	-1.52	0.0649	1130	0.982	0.935	16924	0.997	-6.4	8	-1.73	0.0422	707	0.975	0.958	17348	0.997
KRT40	-5.79	8	-1.52	0.0649	1131	0.982	0.935	16923	0.997	-6.68	8	-1.8	0.0358	604	0.975	0.964	17451	0.997
FKBP10	-5.79	8	-1.52	0.0649	1132	0.982	0.935	16922	0.997	-2.88	8	-0.75	0.228	3836	0.975	0.772	14219	0.98
UFSP1	-5.78	8	-1.51	0.0649	1133	0.982	0.935	16921	0.997	-2.32	8	-0.59	0.278	4731	0.975	0.722	13324	0.978
CDK15	-5.78	8	-1.51	0.0649	1134	0.982	0.935	16920	0.997	-3.46	8	-0.91	0.182	3047	0.975	0.818	15008	0.983
TDRD6	-5.78	8	-1.51	0.0649	1135	0.982	0.935	16919	0.997	-4.25	8	-1.13	0.13	2147	0.975	0.87	15908	0.987
RSL1D1	-5.78	8	-1.51	0.065	1136	0.982	0.935	16918	0.997	-4.11	8	-1.09	0.138	2300	0.975	0.862	15755	0.987
UGGT2	-5.78	8	-1.51	0.0651	1137	0.982	0.935	16917	0.997	-1.49	8	-0.36	0.36	6297	0.975	0.64	11758	0.977
TRMT6	-5.78	8	-1.51	0.0651	1138	0.982	0.935	16916	0.997	-2.03	8	-0.51	0.306	5228	0.975	0.694	12827	0.977
PRKCZ	-5.78	8	-1.51	0.0652	1139	0.982	0.935	16915	0.997	-4.24	8	-1.12	0.13	2153	0.975	0.87	15902	0.987
STARD3NL	-5.78	8	-1.51	0.0652	1140	0.982	0.935	16914	0.997	-8.74	8	-2.37	0.00878	175	0.886	0.991	17880	1
CPNE2	-5.77	8	-1.51	0.0653	1141	0.982	0.935	16913	0.997	-0.79	8	-0.16	0.435	7777	0.975	0.565	10278	0.977
PASD1	-5.77	8	-1.51	0.0653	1142	0.982	0.935	16912	0.997	-8.19	8	-2.22	0.0132	250	0.949	0.987	17805	1
RIBC2	-5.77	8	-1.51	0.0655	1143	0.982	0.934	16911	0.997	-6.6	8	-1.78	0.0375	627	0.975	0.962	17428	0.997
REXO2	-5.76	8	-1.51	0.0656	1144	0.982	0.934	16910	0.997	-4.83	8	-1.29	0.0991	1629	0.975	0.901	16426	0.99
NT5DC3	-5.76	8	-1.51	0.0657	1145	0.982	0.934	16909	0.997	-5.24	8	-1.4	0.0804	1316	0.975	0.92	16739	0.992
NISCH	-5.76	8	-1.51	0.0657	1146	0.982	0.934	16908	0.997	-5.02	8	-1.34	0.09	1472	0.975	0.91	16583	0.991
LINGO2	-5.76	8	-1.51	0.0657	1147	0.982	0.934	16907	0.997	-3.36	8	-0.88	0.19	3165	0.975	0.81	14890	0.982
FOXD1	-5.76	8	-1.51	0.0658	1148	0.982	0.934	16906	0.997	-6.16	8	-1.66	0.0488	823	0.975	0.951	17232	0.996
DYNC1I1	-5.76	8	-1.51	0.0658	1149	0.982	0.934	16905	0.997	-6.39	8	-1.72	0.0426	722	0.975	0.957	17333	0.997
EXOC2	-5.76	8	-1.51	0.0658	1150	0.982	0.934	16904	0.997	-1.66	8	-0.41	0.342	5943	0.975	0.658	12112	0.977
RD3	-5.76	8	-1.51	0.0658	1151	0.982	0.934	16903	0.997	-4.2	8	-1.11	0.133	2195	0.975	0.867	15860	0.987
OR4F6	-5.76	8	-1.51	0.0659	1152	0.982	0.934	16902	0.997	-5.64	8	-1.51	0.0651	1101	0.975	0.935	16954	0.995
PLEKHA7	-5.75	8	-1.51	0.066	1153	0.982	0.934	16901	0.997	-2.83	8	-0.73	0.233	3914	0.975	0.767	14141	0.98
TMA16	-5.75	8	-1.51	0.066	1154	0.982	0.934	16900	0.997	-2.49	8	-0.64	0.262	4438	0.975	0.738	13617	0.978
HBZ	-5.75	8	-1.51	0.066	1155	0.982	0.934	16899	0.997	-4	8	-1.06	0.145	2409	0.975	0.855	15646	0.986
MPPED2	-5.75	8	-1.51	0.066	1156	0.982	0.934	16898	0.997	-5.47	8	-1.46	0.0715	1183	0.975	0.928	16872	0.993
NDP	-5.75	8	-1.51	0.0661	1157	0.982	0.934	16897	0.997	-8.78	8	-2.39	0.00853	172	0.886	0.991	17883	1
LRTOMT	-5.75	8	-1.5	0.0662	1158	0.982	0.934	16896	0.997	-5.31	8	-1.42	0.0776	1276	0.975	0.922	16779	0.992
SLC4A9	-5.75	8	-1.5	0.0662	1159	0.982	0.934	16895	0.997	0.08	8	0.08	0.531	9630	0.975	0.469	8425	0.977
CPNE7	-5.74	8	-1.5	0.0663	1160	0.982	0.934	16894	0.997	-4.95	8	-1.32	0.0933	1531	0.975	0.907	16524	0.99
OR4D10	-5.74	8	-1.5	0.0664	1161	0.982	0.934	16893	0.997	-2.98	8	-0.77	0.22	3688	0.975	0.78	14367	0.981
PARP9	-5.74	8	-1.5	0.0665	1162	0.982	0.934	16892	0.997	-8.03	8	-2.18	0.0147	271	0.975	0.985	17784	1
DSCR4	-5.74	8	-1.5	0.0665	1163	0.982	0.934	16891	0.997	-2.72	8	-0.7	0.242	4084	0.975	0.758	13971	0.98
EXPH5	-5.74	8	-1.5	0.0665	1164	0.982	0.933	16890	0.997	-7.25	8	-1.96	0.0249	422	0.975	0.975	17633	0.998
ZFP91	-5.73	8	-1.5	0.0668	1165	0.982	0.933	16889	0.997	-5.05	8	-1.35	0.0886	1453	0.975	0.911	16602	0.991
RP2	-5.73	8	-1.5	0.0668	1166	0.982	0.933	16888	0.997	-4.77	8	-1.27	0.102	1675	0.975	0.898	16380	0.99
CAPRIN1	-5.73	8	-1.5	0.0669	1167	0.982	0.933	16887	0.997	-7.83	8	-2.12	0.017	303	0.975	0.983	17752	1
PBDC1	-5.73	8	-1.5	0.0669	1168	0.982	0.933	16886	0.997	-3.09	8	-0.8	0.211	3547	0.975	0.789	14508	0.981
NINJ1	-5.73	8	-1.5	0.0669	1169	0.982	0.933	16885	0.997	-3.75	8	-0.99	0.161	2696	0.975	0.839	15359	0.985
STAMBPL1	-5.73	8	-1.5	0.0669	1170	0.982	0.933	16884	0.997	-0.97	8	-0.21	0.416	7399	0.975	0.584	10656	0.977
CPSF6	-5.36	7	-1.5	0.0669	1171	0.982	0.933	16883	0.997	0.09	6	0.08	0.534	9691	0.975	0.466	8364	0.977
SYMPK	-5.72	8	-1.5	0.0671	1172	0.982	0.933	16882	0.997	1.62	8	0.51	0.693	12820	0.975	0.307	5235	0.977
TMEM209	-5.72	8	-1.5	0.0671	1173	0.982	0.933	16881	0.997	-0.86	8	-0.18	0.427	7629	0.975	0.573	10426	0.977
CD82	-5.72	8	-1.5	0.0671	1174	0.982	0.933	16880	0.997	-6.86	8	-1.85	0.032	541	0.975	0.968	17514	0.998
NXPE4	-5.72	8	-1.5	0.0672	1175	0.982	0.933	16879	0.997	-4.17	8	-1.1	0.135	2239	0.975	0.865	15816	0.987
HSP90AB1	-5.72	8	-1.5	0.0672	1176	0.982	0.933	16878	0.997	-4.12	8	-1.09	0.138	2294	0.975	0.862	15761	0.987
CHST6	-5.72	8	-1.5	0.0672	1177	0.982	0.933	16877	0.997	-4.65	8	-1.24	0.108	1775	0.975	0.892	16280	0.989
IL7R	-5.72	8	-1.5	0.0673	1178	0.982	0.933	16876	0.997	-6.46	8	-1.74	0.0409	683	0.975	0.959	17372	0.997
SNCB	-5.72	8	-1.5	0.0673	1179	0.982	0.933	16875	0.997	-3.09	8	-0.8	0.211	3559	0.975	0.789	14496	0.981
MTPAP	-5.72	8	-1.5	0.0673	1180	0.982	0.933	16874	0.997	4.07	8	1.19	0.883	16147	0.987	0.117	1908	0.977
MYL4	-5.71	8	-1.5	0.0674	1181	0.982	0.933	16873	0.997	-4.6	8	-1.22	0.111	1825	0.975	0.889	16230	0.989
EPRS	-5.71	8	-1.49	0.0675	1182	0.982	0.933	16872	0.997	-1.61	8	-0.39	0.348	6052	0.975	0.652	12003	0.977
PANX3	-5.71	8	-1.49	0.0675	1183	0.982	0.932	16871	0.997	-5.56	8	-1.49	0.068	1141	0.975	0.932	16914	0.995
CBR1	-5.71	8	-1.49	0.0676	1184	0.982	0.932	16870	0.997	-1.97	8	-0.49	0.312	5348	0.975	0.688	12707	0.977
PDE4C	-5.71	8	-1.49	0.0677	1185	0.982	0.932	16869	0.997	-3.99	8	-1.05	0.146	2418	0.975	0.854	15637	0.986
PARP14	-5.71	8	-1.49	0.0677	1186	0.982	0.932	16868	0.997	-6.06	8	-1.63	0.0516	879	0.975	0.948	17176	0.996
CNTN6	-5.7	8	-1.49	0.0679	1187	0.982	0.932	16867	0.997	-6.2	8	-1.67	0.0478	808	0.975	0.952	17247	0.996
ATAD3B	-5.7	8	-1.49	0.0679	1188	0.982	0.932	16866	0.997	-3.57	8	-0.94	0.174	2919	0.975	0.826	15136	0.985
OR6C74	-5.7	8	-1.49	0.0679	1189	0.982	0.932	16865	0.997	-3.66	8	-0.96	0.168	2812	0.975	0.832	15243	0.985
FOXP3	-5.7	8	-1.49	0.0681	1190	0.982	0.932	16864	0.997	-6.56	8	-1.77	0.0386	642	0.975	0.961	17413	0.997
RARRES3	-5.69	8	-1.49	0.0681	1191	0.982	0.932	16863	0.997	-7.64	8	-2.07	0.0193	347	0.975	0.981	17708	1
TXNL4A	-5.69	8	-1.49	0.0681	1192	0.982	0.932	16862	0.997	-2.44	8	-0.62	0.267	4532	0.975	0.733	13523	0.978
MPI	-5.69	8	-1.49	0.0682	1193	0.982	0.932	16861	0.997	-11.3	8	-3.09	0.00102	51	0.359	0.999	18004	1
ASIC4	-5.69	8	-1.49	0.0682	1194	0.982	0.932	16860	0.997	-4.7	8	-1.25	0.105	1737	0.975	0.895	16318	0.989
TBX4	-5.69	8	-1.49	0.0682	1195	0.982	0.932	16859	0.997	-2.55	8	-0.65	0.257	4358	0.975	0.743	13697	0.979
FAM227A	-4.93	6	-1.49	0.0683	1196	0.982	0.932	16858	0.997	-2.11	6	-0.62	0.267	4554	0.975	0.733	13501	0.978
ANKMY1	-5.69	8	-1.49	0.0683	1197	0.982	0.932	16857	0.997	-8.86	8	-2.41	0.00803	165	0.875	0.992	17890	1
CLEC4A	-5.69	8	-1.49	0.0683	1198	0.982	0.932	16856	0.997	-6.12	8	-1.65	0.0499	845	0.975	0.95	17210	0.996
DPH7	-5.69	8	-1.49	0.0685	1199	0.982	0.932	16855	0.997	-6.45	8	-1.74	0.0411	687	0.975	0.959	17368	0.997
C11orf68	-5.68	8	-1.49	0.0685	1200	0.982	0.931	16854	0.997	-5.8	8	-1.56	0.0597	993	0.975	0.94	17062	0.995
SLC15A3	-5.68	8	-1.49	0.0687	1201	0.982	0.931	16853	0.997	-4.81	8	-1.28	0.1	1646	0.975	0.9	16409	0.99
ZNF787	-5.68	8	-1.48	0.0688	1202	0.982	0.931	16852	0.997	-6.95	8	-1.88	0.0303	516	0.975	0.97	17539	0.998
GANAB	-5.67	8	-1.48	0.0689	1203	0.982	0.931	16851	0.997	-7.73	8	-2.09	0.0181	325	0.975	0.982	17730	1
KCTD16	-5.67	8	-1.48	0.0689	1204	0.982	0.931	16850	0.997	-3.9	8	-1.03	0.152	2522	0.975	0.848	15533	0.985
UBR1	-5.67	8	-1.48	0.0691	1205	0.982	0.931	16849	0.997	-1.01	8	-0.23	0.411	7299	0.975	0.589	10756	0.977
NCAPD2	-5.66	8	-1.48	0.0693	1206	0.982	0.931	16848	0.997	-4.52	8	-1.2	0.115	1886	0.975	0.885	16169	0.988
IL2RB	-5.66	8	-1.48	0.0694	1207	0.982	0.931	16847	0.997	-4.18	8	-1.11	0.135	2230	0.975	0.865	15825	0.987
LTBP2	-5.66	8	-1.48	0.0695	1208	0.982	0.93	16846	0.997	-3.26	8	-0.85	0.198	3290	0.975	0.802	14765	0.981
PTPN4	-5.66	8	-1.48	0.0695	1209	0.982	0.93	16845	0.997	-7.38	8	-2	0.0229	389	0.975	0.977	17666	0.999
SCAND3	-5.65	8	-1.48	0.0697	1210	0.982	0.93	16844	0.997	-6.4	8	-1.72	0.0423	709	0.975	0.958	17346	0.997
FASTKD3	-5.65	8	-1.48	0.0697	1211	0.982	0.93	16843	0.997	-3.42	8	-0.89	0.186	3097	0.975	0.814	14958	0.983
REXO4	-5.64	8	-1.48	0.07	1212	0.982	0.93	16842	0.997	-5.18	8	-1.39	0.083	1356	0.975	0.917	16699	0.991
MLEC	-5.64	8	-1.48	0.0701	1213	0.982	0.93	16841	0.997	-5.98	8	-1.61	0.054	901	0.975	0.946	17154	0.996
OR4N4	-5.64	8	-1.48	0.0701	1214	0.982	0.93	16840	0.997	-3.81	8	-1	0.158	2627	0.975	0.842	15428	0.985
KMT2D	-5.64	8	-1.48	0.0701	1215	0.982	0.93	16839	0.997	-8.04	8	-2.18	0.0146	270	0.975	0.985	17785	1
PLAC1L	-4.88	6	-1.47	0.0701	1216	0.982	0.93	16838	0.997	-4.15	6	-1.28	0.101	1655	0.975	0.899	16400	0.99
RHD	-5.64	8	-1.47	0.0702	1217	0.982	0.93	16837	0.997	-4.67	8	-1.24	0.107	1753	0.975	0.893	16302	0.989
ZBTB45	-5.64	8	-1.47	0.0702	1218	0.982	0.93	16836	0.997	-3.99	8	-1.05	0.146	2423	0.975	0.854	15632	0.986
CUL4B	-5.63	8	-1.47	0.0704	1219	0.982	0.93	16835	0.997	-7.9	8	-2.14	0.0162	291	0.975	0.984	17764	1
RHCE	-4.88	6	-1.47	0.0704	1220	0.982	0.93	16834	0.997	-3.67	6	-1.12	0.131	2163	0.975	0.869	15892	0.987
TBL1X	-5.63	8	-1.47	0.0705	1221	0.982	0.93	16833	0.997	-5.37	8	-1.44	0.0752	1243	0.975	0.925	16812	0.993
GATA2	-5.63	8	-1.47	0.0705	1222	0.982	0.929	16832	0.997	-5.14	8	-1.37	0.0847	1385	0.975	0.915	16670	0.991
LIMS2	-5.63	8	-1.47	0.0706	1223	0.982	0.929	16831	0.997	-6.24	8	-1.68	0.0465	789	0.975	0.953	17266	0.996
SLC2A4RG	-5.63	8	-1.47	0.0707	1224	0.982	0.929	16830	0.997	-1.67	8	-0.41	0.341	5908	0.975	0.659	12147	0.977
PEAK1	-5.62	8	-1.47	0.0708	1225	0.982	0.929	16829	0.997	-4.53	8	-1.2	0.114	1878	0.975	0.886	16177	0.988
CABP4	-5.62	8	-1.47	0.0709	1226	0.982	0.929	16828	0.997	-5.35	8	-1.43	0.076	1254	0.975	0.924	16801	0.993
MYH9	-5.62	8	-1.47	0.0709	1227	0.982	0.929	16827	0.997	-5.96	8	-1.6	0.0547	914	0.975	0.945	17141	0.995
AP1G1	-5.62	8	-1.47	0.0709	1228	0.982	0.929	16826	0.997	-7.2	8	-1.95	0.0257	439	0.975	0.974	17616	0.998
NUCB2	-5.62	8	-1.47	0.071	1229	0.982	0.929	16825	0.997	-3.69	8	-0.97	0.166	2766	0.975	0.834	15289	0.985
RELA	-5.62	8	-1.47	0.071	1230	0.982	0.929	16824	0.997	-5.88	8	-1.58	0.0571	947	0.975	0.943	17108	0.995
GAPVD1	-5.62	8	-1.47	0.071	1231	0.982	0.929	16823	0.997	-5.58	8	-1.5	0.0674	1135	0.975	0.933	16920	0.995
FNBP1	-5.61	8	-1.47	0.0711	1232	0.982	0.929	16822	0.997	-5.84	8	-1.57	0.0584	971	0.975	0.942	17084	0.995
PLCD1	-5.61	8	-1.47	0.0711	1233	0.982	0.929	16821	0.997	-6.47	8	-1.74	0.0407	679	0.975	0.959	17376	0.997
NCK1	-5.61	8	-1.47	0.0711	1234	0.982	0.929	16820	0.997	-2.77	8	-0.71	0.238	4017	0.975	0.762	14038	0.98
ZNF829	-5.61	8	-1.47	0.0711	1235	0.982	0.929	16819	0.997	-8.29	8	-2.25	0.0122	232	0.949	0.988	17823	1
TMEM261	-5.61	8	-1.47	0.0711	1236	0.982	0.929	16818	0.997	-3.35	8	-0.88	0.19	3181	0.975	0.81	14874	0.982
CDYL2	-5.61	8	-1.47	0.0712	1237	0.982	0.929	16817	0.997	-4.16	8	-1.1	0.136	2253	0.975	0.864	15802	0.987
MRGPRX4	-5.61	8	-1.47	0.0712	1238	0.982	0.929	16816	0.997	-8.17	8	-2.22	0.0133	253	0.949	0.987	17802	1
IRAK4	-5.61	8	-1.47	0.0712	1239	0.982	0.929	16815	0.997	-4.09	8	-1.08	0.14	2326	0.975	0.86	15729	0.987
MT1G	-2.8	2	-1.47	0.0713	1240	0.982	0.929	16814	0.997	0.29	2	0.22	0.585	10707	0.975	0.415	7348	0.977
HERPUD2	-5.61	8	-1.47	0.0713	1241	0.982	0.929	16813	0.997	-3.12	8	-0.81	0.208	3494	0.975	0.792	14561	0.981
INPP5J	-5.6	8	-1.46	0.0716	1242	0.982	0.928	16812	0.997	-4.69	8	-1.25	0.106	1743	0.975	0.894	16312	0.989
FAM208A	-5.6	8	-1.46	0.0716	1243	0.982	0.928	16811	0.997	-6.63	8	-1.79	0.0368	616	0.975	0.963	17439	0.997
RQCD1	-5.6	8	-1.46	0.0718	1244	0.982	0.928	16810	0.997	-6.35	8	-1.71	0.0435	736	0.975	0.956	17319	0.997
NR1H3	-5.59	8	-1.46	0.0719	1245	0.982	0.928	16809	0.997	-5.74	8	-1.54	0.0616	1031	0.975	0.938	17024	0.995
GTF2I	-5.59	8	-1.46	0.072	1246	0.982	0.928	16808	0.997	-3.66	8	-0.96	0.168	2810	0.975	0.832	15245	0.985
SEC14L4	-5.59	8	-1.46	0.072	1247	0.982	0.928	16807	0.997	-0.03	8	0.05	0.519	9390	0.975	0.481	8665	0.977
SLC29A4	-5.59	8	-1.46	0.072	1248	0.982	0.928	16806	0.997	-4.66	8	-1.24	0.108	1771	0.975	0.892	16284	0.989
NOS2	-5.59	8	-1.46	0.0721	1249	0.982	0.928	16805	0.997	-1.82	8	-0.45	0.326	5629	0.975	0.674	12426	0.977
OR9K2	-5.58	8	-1.46	0.0722	1250	0.982	0.928	16804	0.997	-1.49	8	-0.36	0.36	6286	0.975	0.64	11769	0.977
GPR115	-5.58	8	-1.46	0.0722	1251	0.982	0.928	16803	0.997	-4.14	8	-1.1	0.136	2260	0.975	0.864	15795	0.987
PHKG2	-5.58	8	-1.46	0.0722	1252	0.982	0.928	16802	0.997	-5.84	8	-1.57	0.0585	973	0.975	0.941	17082	0.995
AGTRAP	-5.58	8	-1.46	0.0722	1253	0.982	0.928	16801	0.997	-7.66	8	-2.07	0.0191	344	0.975	0.981	17711	1
SLC39A4	-5.58	8	-1.46	0.0722	1254	0.982	0.928	16800	0.997	-3.74	8	-0.99	0.162	2708	0.975	0.838	15347	0.985
PTPRN2	-5.58	8	-1.46	0.0723	1255	0.982	0.928	16799	0.997	-2.31	8	-0.59	0.279	4749	0.975	0.721	13306	0.978
COA5	-5.58	8	-1.46	0.0725	1256	0.982	0.928	16798	0.997	0.06	8	0.07	0.529	9603	0.975	0.471	8452	0.977
DMKN	-5.58	8	-1.46	0.0726	1257	0.982	0.927	16797	0.997	-6.1	8	-1.64	0.0504	855	0.975	0.95	17200	0.996
SLC11A1	-5.58	8	-1.46	0.0726	1258	0.982	0.927	16796	0.997	-4.02	8	-1.06	0.144	2385	0.975	0.856	15670	0.986
AP1B1	-4.83	6	-1.46	0.0726	1259	0.982	0.927	16795	0.997	-0.97	6	-0.26	0.399	7084	0.975	0.601	10971	0.977
MARCKSL1	-5.57	8	-1.46	0.0727	1260	0.982	0.927	16794	0.997	-3.7	8	-0.97	0.165	2754	0.975	0.835	15301	0.985
MCRS1	-5.57	8	-1.46	0.0727	1261	0.982	0.927	16793	0.997	-3.83	8	-1.01	0.156	2599	0.975	0.844	15456	0.985
NUSAP1	-5.57	8	-1.46	0.0727	1262	0.982	0.927	16792	0.997	-8.32	8	-2.26	0.0119	230	0.937	0.988	17825	1
OSBPL5	-5.57	8	-1.46	0.0728	1263	0.982	0.927	16791	0.997	0.34	8	0.15	0.56	10206	0.975	0.44	7849	0.977
CCDC148	-5.57	8	-1.45	0.0729	1264	0.982	0.927	16790	0.997	-7.15	8	-1.93	0.0267	452	0.975	0.973	17603	0.998
LUZP2	-5.56	8	-1.45	0.073	1265	0.982	0.927	16789	0.997	-9.21	8	-2.51	0.0061	132	0.824	0.994	17923	1
2022-09-06	-5.56	8	-1.45	0.0732	1266	0.982	0.927	16788	0.997	-3	8	-0.78	0.218	3661	0.975	0.782	14394	0.981
MRPL32	-5.56	8	-1.45	0.0733	1267	0.982	0.927	16787	0.997	-2.71	8	-0.7	0.243	4101	0.975	0.757	13954	0.98
CES2	-5.56	8	-1.45	0.0733	1268	0.982	0.927	16786	0.997	-3.99	8	-1.06	0.146	2412	0.975	0.854	15643	0.986
RNF187	-5.56	8	-1.45	0.0733	1269	0.982	0.927	16785	0.997	-4.59	8	-1.22	0.111	1828	0.975	0.889	16227	0.989
GATA3	-5.55	8	-1.45	0.0734	1270	0.982	0.927	16784	0.997	-7.92	8	-2.15	0.0159	288	0.975	0.984	17767	1
MPP1	-5.55	8	-1.45	0.0734	1271	0.982	0.927	16783	0.997	-3.35	8	-0.88	0.19	3182	0.975	0.81	14873	0.982
CCNK	-4.81	6	-1.45	0.0735	1272	0.982	0.927	16782	0.997	-4.45	7	-1.27	0.103	1683	0.975	0.897	16372	0.989
SERTAD3	-5.55	8	-1.45	0.0736	1273	0.982	0.926	16781	0.997	-5.19	8	-1.39	0.0826	1348	0.975	0.917	16707	0.991
KLK2	-5.55	8	-1.45	0.0736	1274	0.982	0.926	16780	0.997	-5.43	8	-1.45	0.0731	1214	0.975	0.927	16841	0.993
LMBRD1	-5.55	8	-1.45	0.0737	1275	0.982	0.926	16779	0.997	-7.78	8	-2.11	0.0175	314	0.975	0.982	17741	1
NCR3LG1	-5.55	8	-1.45	0.0737	1276	0.982	0.926	16778	0.997	-5.05	8	-1.35	0.0886	1455	0.975	0.911	16600	0.991
RNF4	-5.54	8	-1.45	0.0738	1277	0.982	0.926	16777	0.997	-3.46	8	-0.91	0.182	3042	0.975	0.818	15013	0.983
MDFI	-3.92	4	-1.45	0.0739	1278	0.982	0.926	16776	0.997	-4.2	4	-1.6	0.0551	918	0.975	0.945	17137	0.995
RNF144B	-5.54	8	-1.45	0.0741	1279	0.982	0.926	16775	0.996	-2.63	8	-0.68	0.25	4232	0.975	0.75	13823	0.979
CHST10	-5.54	8	-1.45	0.0741	1280	0.982	0.926	16774	0.996	-7.48	8	-2.02	0.0215	365	0.975	0.979	17690	0.999
CABIN1	-5.53	8	-1.45	0.0741	1281	0.982	0.926	16773	0.996	-5.94	8	-1.6	0.0551	919	0.975	0.945	17136	0.995
C1orf186	-5.53	8	-1.45	0.0742	1282	0.982	0.926	16772	0.996	1.37	8	0.44	0.669	12358	0.975	0.331	5697	0.977
C15orf27	-5.53	8	-1.45	0.0742	1283	0.982	0.926	16771	0.996	-6.98	8	-1.88	0.0297	510	0.975	0.97	17545	0.998
PILRB	-5.53	8	-1.45	0.0742	1284	0.982	0.926	16770	0.996	-5.54	8	-1.49	0.0686	1146	0.975	0.931	16909	0.994
TNKS	-5.53	8	-1.45	0.0742	1285	0.982	0.926	16769	0.996	-3.95	8	-1.04	0.149	2463	0.975	0.851	15592	0.986
CCDC64	-4.79	6	-1.45	0.0742	1286	0.982	0.926	16768	0.996	-2.99	7	-0.83	0.202	3377	0.975	0.798	14678	0.981
GPR176	-5.53	8	-1.45	0.0742	1287	0.982	0.926	16767	0.996	-3.19	8	-0.83	0.203	3390	0.975	0.797	14665	0.981
TCTEX1D2	-5.53	8	-1.44	0.0742	1288	0.982	0.926	16766	0.996	-4.52	8	-1.2	0.115	1887	0.975	0.885	16168	0.988
NUDT4	-5.53	8	-1.44	0.0743	1289	0.982	0.926	16765	0.996	-3.87	8	-1.02	0.154	2553	0.975	0.846	15502	0.985
CCDC120	-5.53	8	-1.44	0.0743	1290	0.982	0.926	16764	0.996	-1.36	8	-0.32	0.374	6576	0.975	0.626	11479	0.977
SPAG5	-5.53	8	-1.44	0.0744	1291	0.982	0.926	16763	0.996	-4.03	8	-1.06	0.144	2382	0.975	0.856	15673	0.986
GAS1	-5.53	8	-1.44	0.0744	1292	0.982	0.926	16762	0.996	-1.94	8	-0.48	0.314	5399	0.975	0.686	12656	0.977
ZCRB1	-5.53	8	-1.44	0.0744	1293	0.982	0.926	16761	0.996	-1.83	8	-0.45	0.325	5606	0.975	0.675	12449	0.977
MYBPC2	-5.52	8	-1.44	0.0745	1294	0.982	0.925	16760	0.996	-4.51	8	-1.2	0.115	1904	0.975	0.885	16151	0.988
DHX16	-5.52	8	-1.44	0.0745	1295	0.982	0.925	16759	0.996	-9.58	8	-2.61	0.00454	102	0.787	0.995	17953	1
TAS2R5	-5.52	8	-1.44	0.0746	1296	0.982	0.925	16758	0.996	-4.98	8	-1.33	0.0918	1503	0.975	0.908	16552	0.991
LPGAT1	-5.52	8	-1.44	0.0747	1297	0.982	0.925	16757	0.996	-3.63	8	-0.95	0.17	2847	0.975	0.83	15208	0.985
TBC1D25	-5.52	8	-1.44	0.0747	1298	0.982	0.925	16756	0.996	-2.07	8	-0.52	0.302	5157	0.975	0.698	12898	0.978
IGLL5	-5.52	8	-1.44	0.0749	1299	0.982	0.925	16755	0.996	-1.39	8	-0.33	0.37	6475	0.975	0.63	11580	0.977
JRKL	-5.52	8	-1.44	0.0749	1300	0.982	0.925	16754	0.996	-7.21	8	-1.95	0.0257	438	0.975	0.974	17617	0.998
ABCF1	-5.51	8	-1.44	0.0749	1301	0.982	0.925	16753	0.996	-5.24	8	-1.4	0.0807	1322	0.975	0.919	16733	0.992
PLOD1	-5.51	8	-1.44	0.075	1302	0.982	0.925	16752	0.996	-2.48	8	-0.63	0.264	4472	0.975	0.736	13583	0.978
NAP1L1	-5.51	8	-1.44	0.0751	1303	0.982	0.925	16751	0.996	-4.96	8	-1.32	0.0927	1516	0.975	0.907	16539	0.99
ISLR2	-5.51	8	-1.44	0.0752	1304	0.982	0.925	16750	0.996	-0.18	8	0.01	0.503	9076	0.975	0.497	8979	0.977
TMEM71	-5.5	8	-1.44	0.0753	1305	0.982	0.925	16749	0.996	-2.97	8	-0.77	0.221	3716	0.975	0.779	14339	0.981
OR5D16	-5.5	8	-1.44	0.0754	1306	0.982	0.925	16748	0.996	-9.18	8	-2.5	0.00626	136	0.824	0.994	17919	1
HMGN4	-5.5	8	-1.44	0.0755	1307	0.982	0.925	16747	0.996	-0.26	8	-0.02	0.493	8892	0.975	0.507	9163	0.977
SLC13A1	-5.5	8	-1.44	0.0755	1308	0.982	0.924	16746	0.996	-5.15	8	-1.38	0.0845	1380	0.975	0.915	16675	0.991
RAB39A	-5.5	8	-1.44	0.0755	1309	0.982	0.924	16745	0.996	-4.12	8	-1.09	0.138	2285	0.975	0.862	15770	0.987
UBE2D4	-5.5	8	-1.44	0.0756	1310	0.982	0.924	16744	0.996	-1.64	8	-0.4	0.344	5973	0.975	0.656	12082	0.977
CRYGC	-5.5	8	-1.44	0.0756	1311	0.982	0.924	16743	0.996	-2.4	8	-0.61	0.27	4601	0.975	0.73	13454	0.978
EPB41	-5.5	8	-1.44	0.0756	1312	0.982	0.924	16742	0.996	-2.59	8	-0.66	0.254	4305	0.975	0.746	13750	0.979
XYLT2	-5.49	8	-1.43	0.0757	1313	0.982	0.924	16741	0.996	-2.89	8	-0.75	0.227	3812	0.975	0.773	14243	0.98
NLRC4	-5.49	8	-1.43	0.0757	1314	0.982	0.924	16740	0.996	0.13	8	0.09	0.537	9739	0.975	0.463	8316	0.977
EXD3	-5.49	8	-1.43	0.0757	1315	0.982	0.924	16739	0.996	-2.97	8	-0.77	0.22	3699	0.975	0.78	14356	0.981
ANO6	-5.49	8	-1.43	0.0758	1316	0.982	0.924	16738	0.996	-3.67	8	-0.97	0.167	2797	0.975	0.833	15258	0.985
DEPDC4	-5.49	8	-1.43	0.0758	1317	0.982	0.924	16737	0.996	-2.93	8	-0.76	0.224	3756	0.975	0.776	14299	0.98
HIATL1	-5.49	8	-1.43	0.0759	1318	0.982	0.924	16736	0.996	-9.43	8	-2.57	0.00515	111	0.818	0.995	17944	1
ELMOD2	-5.49	8	-1.43	0.0759	1319	0.982	0.924	16735	0.996	-5.1	8	-1.36	0.0865	1413	0.975	0.914	16642	0.991
VCAN	-5.49	8	-1.43	0.0759	1320	0.982	0.924	16734	0.996	-4.68	8	-1.25	0.106	1749	0.975	0.894	16306	0.989
KLHL13	-4.75	6	-1.43	0.0759	1321	0.982	0.924	16733	0.996	-6.77	6	-2.12	0.017	306	0.975	0.983	17749	1
TMEM136	-5.49	8	-1.43	0.0759	1322	0.982	0.924	16732	0.996	-2.52	8	-0.65	0.259	4397	0.975	0.741	13658	0.979
LGALSL	-5.48	8	-1.43	0.0761	1323	0.982	0.924	16731	0.996	-3.67	8	-0.97	0.167	2799	0.975	0.833	15256	0.985
FAM104B	-3.88	4	-1.43	0.0762	1324	0.982	0.924	16730	0.996	-4.21	4	-1.6	0.0546	910	0.975	0.945	17145	0.995
ZCCHC17	-5.48	8	-1.43	0.0762	1325	0.982	0.924	16729	0.996	-0.84	8	-0.18	0.429	7662	0.975	0.571	10393	0.977
UBQLNL	-5.48	8	-1.43	0.0762	1326	0.982	0.924	16728	0.996	-5.19	8	-1.39	0.0828	1354	0.975	0.917	16701	0.991
CHCHD1	-5.48	8	-1.43	0.0763	1327	0.982	0.924	16727	0.996	-1.16	8	-0.27	0.395	7007	0.975	0.605	11048	0.977
TSPAN17	-5.48	8	-1.43	0.0764	1328	0.982	0.924	16726	0.996	-3.22	8	-0.84	0.201	3349	0.975	0.799	14706	0.981
C14orf1	-5.48	8	-1.43	0.0764	1329	0.982	0.924	16725	0.996	-2.52	8	-0.65	0.259	4398	0.975	0.741	13657	0.979
KIAA0125	-5.48	8	-1.43	0.0765	1330	0.982	0.924	16724	0.996	-1.65	8	-0.4	0.344	5967	0.975	0.656	12088	0.977
AWAT2	-5.47	8	-1.43	0.0765	1331	0.982	0.924	16723	0.996	-1.8	8	-0.44	0.328	5656	0.975	0.672	12399	0.977
RTN4R	-5.47	8	-1.43	0.0765	1332	0.982	0.924	16722	0.996	-4.52	8	-1.2	0.115	1898	0.975	0.885	16157	0.988
GLT6D1	-5.47	8	-1.43	0.0768	1333	0.982	0.923	16721	0.996	-2.54	8	-0.65	0.258	4372	0.975	0.742	13683	0.979
PPIE	-5.47	8	-1.43	0.0768	1334	0.982	0.923	16720	0.996	-1.91	8	-0.48	0.317	5449	0.975	0.683	12606	0.977
TMEM240	-4.73	6	-1.43	0.0769	1335	0.982	0.923	16719	0.996	-3.01	6	-0.91	0.181	3017	0.975	0.819	15038	0.983
VKORC1L1	-5.46	8	-1.43	0.0769	1336	0.982	0.923	16718	0.996	-2.81	8	-0.73	0.234	3946	0.975	0.766	14109	0.98
FN3KRP	-5.46	8	-1.43	0.0769	1337	0.982	0.923	16717	0.996	-3.78	8	-1	0.16	2662	0.975	0.84	15393	0.985
GLIPR1L2	-5.46	8	-1.43	0.0769	1338	0.982	0.923	16716	0.996	-3.52	8	-0.92	0.178	2967	0.975	0.822	15088	0.984
C22orf39	-5.46	8	-1.43	0.077	1339	0.982	0.923	16715	0.996	-4.88	8	-1.3	0.0964	1583	0.975	0.904	16472	0.99
MGRN1	-5.46	8	-1.43	0.077	1340	0.982	0.923	16714	0.996	-5.47	8	-1.46	0.0715	1180	0.975	0.929	16875	0.993
PDZD11	-5.45	8	-1.42	0.0774	1341	0.982	0.923	16713	0.996	-2.9	8	-0.75	0.227	3803	0.975	0.773	14252	0.98
MYH2	-5.45	8	-1.42	0.0774	1342	0.982	0.923	16712	0.996	-5.65	8	-1.52	0.0648	1095	0.975	0.935	16960	0.995
SKIV2L2	-5.45	8	-1.42	0.0775	1343	0.982	0.923	16711	0.996	-2.18	8	-0.55	0.291	4968	0.975	0.709	13087	0.978
SCN3B	-5.45	8	-1.42	0.0775	1344	0.982	0.923	16710	0.996	-3.12	8	-0.81	0.208	3495	0.975	0.792	14560	0.981
ADRB2	-5.45	8	-1.42	0.0775	1345	0.982	0.923	16709	0.996	-3.48	8	-0.91	0.181	3016	0.975	0.819	15039	0.983
PPIP5K2	-5.45	8	-1.42	0.0775	1346	0.982	0.922	16708	0.996	-3.46	8	-0.91	0.182	3046	0.975	0.818	15009	0.983
TMEM39A	-5.45	8	-1.42	0.0775	1347	0.982	0.922	16707	0.996	-4.44	8	-1.18	0.119	1965	0.975	0.881	16090	0.988
TIGD5	-5.45	8	-1.42	0.0775	1348	0.982	0.922	16706	0.996	-1.44	8	-0.34	0.366	6392	0.975	0.634	11663	0.977
VGLL3	-5.45	8	-1.42	0.0777	1349	0.982	0.922	16705	0.996	-5.76	8	-1.55	0.061	1022	0.975	0.939	17033	0.995
NDUFAF2	-5.44	8	-1.42	0.0777	1350	0.982	0.922	16704	0.996	-2.25	8	-0.57	0.284	4849	0.975	0.716	13206	0.978
CEBPG	-5.44	8	-1.42	0.0777	1351	0.982	0.922	16703	0.996	-4.72	8	-1.26	0.104	1716	0.975	0.896	16339	0.989
PRMT1	-5.44	8	-1.42	0.0777	1352	0.982	0.922	16702	0.996	-7.22	8	-1.95	0.0255	434	0.975	0.975	17621	0.998
PAPL	-5.44	8	-1.42	0.0779	1353	0.982	0.922	16701	0.996	-9.31	8	-2.53	0.00563	123	0.818	0.994	17932	1
SLC29A3	-5.44	8	-1.42	0.0779	1354	0.982	0.922	16700	0.996	-2.86	8	-0.74	0.23	3878	0.975	0.77	14177	0.98
ZNF580	-5.43	8	-1.42	0.0781	1355	0.982	0.922	16699	0.996	-4.9	8	-1.31	0.0957	1574	0.975	0.904	16481	0.99
CELA2B	-5.43	8	-1.42	0.0781	1356	0.982	0.922	16698	0.996	-3.48	8	-0.91	0.181	3020	0.975	0.819	15035	0.983
GTF2H3	-5.43	8	-1.42	0.0781	1357	0.982	0.922	16697	0.996	-1.5	8	-0.36	0.359	6280	0.975	0.641	11775	0.977
SP2	-5.43	8	-1.42	0.0782	1358	0.982	0.922	16696	0.996	-0.74	8	-0.15	0.441	7907	0.975	0.559	10148	0.977
OR1E1	-5.43	8	-1.42	0.0783	1359	0.982	0.922	16695	0.996	-4.18	8	-1.11	0.134	2220	0.975	0.866	15835	0.987
THRSP	-5.43	8	-1.42	0.0783	1360	0.982	0.922	16694	0.996	-3.14	8	-0.82	0.207	3471	0.975	0.793	14584	0.981
SH2B3	-5.43	8	-1.42	0.0783	1361	0.982	0.922	16693	0.996	-1.66	8	-0.4	0.343	5954	0.975	0.657	12101	0.977
C6orf106	-5.43	8	-1.42	0.0784	1362	0.982	0.922	16692	0.996	-7.32	8	-1.98	0.0238	406	0.975	0.976	17649	0.998
COMMD7	-5.43	8	-1.42	0.0784	1363	0.982	0.922	16691	0.996	-1.39	8	-0.33	0.371	6494	0.975	0.629	11561	0.977
ZNF526	-5.43	8	-1.42	0.0785	1364	0.982	0.922	16690	0.996	-3.97	8	-1.05	0.147	2440	0.975	0.853	15615	0.986
C11orf72	-4.7	6	-1.41	0.0786	1365	0.982	0.921	16689	0.996	-4.61	6	-1.42	0.0772	1271	0.975	0.923	16784	0.993
CALB2	-5.42	8	-1.41	0.0788	1366	0.982	0.921	16688	0.996	-5.76	8	-1.55	0.0612	1024	0.975	0.939	17031	0.995
NAB2	-5.42	8	-1.41	0.0789	1367	0.982	0.921	16687	0.996	2.94	8	0.87	0.809	14859	0.982	0.191	3196	0.977
SMPX	-5.41	8	-1.41	0.0789	1368	0.982	0.921	16686	0.996	-7.08	8	-1.91	0.0279	477	0.975	0.972	17578	0.998
MFAP3	-5.41	8	-1.41	0.0789	1369	0.982	0.921	16685	0.996	-5.98	8	-1.61	0.054	902	0.975	0.946	17153	0.996
WNK2	-5.41	8	-1.41	0.079	1370	0.982	0.921	16684	0.996	-6.57	8	-1.77	0.0383	636	0.975	0.962	17419	0.997
SERPINA7	-5.41	8	-1.41	0.079	1371	0.982	0.921	16683	0.996	-3.19	8	-0.83	0.203	3398	0.975	0.797	14657	0.981
BROX	-5.41	8	-1.41	0.079	1372	0.982	0.921	16682	0.996	-2.21	8	-0.56	0.288	4911	0.975	0.712	13144	0.978
OR52W1	-5.41	8	-1.41	0.0791	1373	0.982	0.921	16681	0.996	-3.87	8	-1.02	0.154	2552	0.975	0.846	15503	0.985
MMP17	-5.41	8	-1.41	0.0791	1374	0.982	0.921	16680	0.996	-3.04	8	-0.79	0.215	3609	0.975	0.785	14446	0.981
EPPK1	-5.41	8	-1.41	0.0792	1375	0.982	0.921	16679	0.996	-3.57	8	-0.94	0.174	2922	0.975	0.826	15133	0.985
FEZ2	-5.4	8	-1.41	0.0795	1376	0.982	0.921	16678	0.996	-2.41	8	-0.61	0.27	4593	0.975	0.73	13462	0.978
FHOD1	-5.4	8	-1.41	0.0797	1377	0.982	0.92	16677	0.996	-0.81	8	-0.17	0.432	7743	0.975	0.568	10312	0.977
OR8D4	-5.39	8	-1.41	0.0797	1378	0.982	0.92	16676	0.996	-2.04	8	-0.51	0.304	5208	0.975	0.696	12847	0.977
LZTR1	-5.39	8	-1.41	0.0797	1379	0.982	0.92	16675	0.996	-3.7	8	-0.97	0.165	2763	0.975	0.835	15292	0.985
TRPA1	-5.39	8	-1.41	0.0798	1380	0.982	0.92	16674	0.996	-4.38	8	-1.16	0.123	2020	0.975	0.877	16035	0.988
EGFP	-12.65	44	-1.41	0.0798	1381	0.982	0.92	16673	0.996	-18.66	44	-2.16	0.0155	285	0.975	0.984	17770	1
DCAF17	-5.39	8	-1.41	0.0799	1382	0.982	0.92	16672	0.996	-6.23	8	-1.68	0.0469	796	0.975	0.953	17259	0.996
CENPT	-5.39	8	-1.4	0.0801	1383	0.982	0.92	16671	0.996	-4.43	8	-1.17	0.12	1977	0.975	0.88	16078	0.988
TPSD1	-5.38	8	-1.4	0.0801	1384	0.982	0.92	16670	0.996	-9.07	8	-2.47	0.0068	145	0.824	0.993	17910	1
C5orf42	-5.38	8	-1.4	0.0801	1385	0.982	0.92	16669	0.996	-0.72	8	-0.14	0.443	7945	0.975	0.557	10110	0.977
MYO19	-5.38	8	-1.4	0.0802	1386	0.982	0.92	16668	0.996	-4.95	8	-1.32	0.0931	1525	0.975	0.907	16530	0.99
ASIC3	-5.37	8	-1.4	0.0805	1387	0.982	0.919	16667	0.996	-8.06	8	-2.19	0.0144	266	0.975	0.986	17789	1
SURF6	-5.37	8	-1.4	0.0806	1388	0.982	0.919	16666	0.996	2.45	8	0.74	0.77	14183	0.98	0.23	3872	0.977
PRCP	-5.37	8	-1.4	0.0806	1389	0.982	0.919	16665	0.996	-4.27	8	-1.13	0.129	2133	0.975	0.871	15922	0.987
C11orf94	-5.37	8	-1.4	0.0806	1390	0.982	0.919	16664	0.996	-4.15	8	-1.1	0.136	2258	0.975	0.864	15797	0.987
GNGT1	-5.37	8	-1.4	0.0807	1391	0.982	0.919	16663	0.996	-8.47	8	-2.3	0.0107	213	0.91	0.989	17842	1
SLC23A1	-5.37	8	-1.4	0.0807	1392	0.982	0.919	16662	0.996	-1.54	8	-0.37	0.355	6192	0.975	0.645	11863	0.977
RAB32	-5.37	8	-1.4	0.0808	1393	0.982	0.919	16661	0.996	-0.95	8	-0.21	0.418	7449	0.975	0.582	10606	0.977
FBXO15	-5.37	8	-1.4	0.0808	1394	0.982	0.919	16660	0.996	-4.02	8	-1.06	0.144	2384	0.975	0.856	15671	0.986
OR4X2	-5.37	8	-1.4	0.0808	1395	0.982	0.919	16659	0.996	-7.15	8	-1.93	0.0267	451	0.975	0.973	17604	0.998
SAR1B	-5.37	8	-1.4	0.0809	1396	0.982	0.919	16658	0.996	-2.05	8	-0.52	0.303	5181	0.975	0.697	12874	0.977
C1orf56	-5.37	8	-1.4	0.0809	1397	0.982	0.919	16657	0.996	-0.6	8	-0.11	0.456	8168	0.975	0.544	9887	0.977
SULT2A1	-5.36	8	-1.4	0.081	1398	0.982	0.919	16656	0.996	-5.62	8	-1.51	0.0657	1113	0.975	0.934	16942	0.995
LYPD4	-5.36	8	-1.4	0.081	1399	0.982	0.919	16655	0.996	0.34	8	0.15	0.56	10216	0.975	0.44	7839	0.977
PLCB3	-5.36	8	-1.4	0.0811	1400	0.982	0.919	16654	0.996	-4.14	8	-1.1	0.136	2266	0.975	0.864	15789	0.987
ENY2	-5.36	8	-1.4	0.0812	1401	0.982	0.919	16653	0.996	-6.14	8	-1.65	0.0494	833	0.975	0.951	17222	0.996
TSPAN19	-5.36	8	-1.4	0.0812	1402	0.982	0.919	16652	0.996	-5.46	8	-1.46	0.0719	1190	0.975	0.928	16865	0.993
OR6Q1	-5.36	8	-1.4	0.0812	1403	0.982	0.919	16651	0.996	-3.62	8	-0.95	0.171	2865	0.975	0.829	15190	0.985
MLST8	-5.36	8	-1.4	0.0813	1404	0.982	0.919	16650	0.996	-10.96	8	-2.99	0.00138	52	0.469	0.999	18003	1
C11orf57	-5.36	8	-1.4	0.0813	1405	0.982	0.919	16649	0.996	-2.49	8	-0.64	0.262	4450	0.975	0.738	13605	0.978
FBLN2	-5.35	8	-1.4	0.0814	1406	0.982	0.919	16648	0.996	-3.47	8	-0.91	0.182	3036	0.975	0.818	15019	0.983
GORASP2	-5.35	8	-1.4	0.0814	1407	0.982	0.919	16647	0.996	-2.91	8	-0.75	0.226	3790	0.975	0.774	14265	0.98
CMTR2	-5.35	8	-1.4	0.0814	1408	0.982	0.919	16646	0.996	-2.8	8	-0.72	0.235	3961	0.975	0.765	14094	0.98
MRPL22	-5.35	8	-1.4	0.0815	1409	0.982	0.919	16645	0.996	2.47	8	0.74	0.771	14209	0.98	0.229	3846	0.977
GAS2L1	-5.35	8	-1.4	0.0815	1410	0.982	0.919	16644	0.996	-2.04	8	-0.51	0.304	5206	0.975	0.696	12849	0.977
MRC2	-5.35	8	-1.39	0.0817	1411	0.982	0.918	16643	0.996	-2.97	8	-0.77	0.221	3711	0.975	0.779	14344	0.981
RBFOX3	-5.35	8	-1.39	0.0817	1412	0.982	0.918	16642	0.996	-3.38	8	-0.88	0.188	3140	0.975	0.812	14915	0.983
PTCD2	-5.35	8	-1.39	0.0817	1413	0.982	0.918	16641	0.996	-1.46	8	-0.35	0.363	6349	0.975	0.637	11706	0.977
CPLX2	-5.35	8	-1.39	0.0818	1414	0.982	0.918	16640	0.996	-3.8	8	-1	0.158	2637	0.975	0.842	15418	0.985
FBXL6	-5.34	8	-1.39	0.0819	1415	0.982	0.918	16639	0.996	-2.4	8	-0.61	0.27	4599	0.975	0.73	13456	0.978
TIGD7	-5.34	8	-1.39	0.0819	1416	0.982	0.918	16638	0.996	-2.91	8	-0.75	0.225	3782	0.975	0.775	14273	0.98
DUSP9	-5.34	8	-1.39	0.0819	1417	0.982	0.918	16637	0.996	-5.78	8	-1.55	0.0604	1008	0.975	0.94	17047	0.995
PCDHGC4	-5.34	8	-1.39	0.0819	1418	0.982	0.918	16636	0.996	-2.65	8	-0.68	0.248	4187	0.975	0.752	13868	0.979
METTL15	-5.34	8	-1.39	0.082	1419	0.982	0.918	16635	0.996	-2.34	8	-0.59	0.276	4717	0.975	0.724	13338	0.978
LAPTM4B	-5.34	8	-1.39	0.0821	1420	0.982	0.918	16634	0.996	-6.12	8	-1.65	0.05	846	0.975	0.95	17209	0.996
OR5AS1	-5.34	8	-1.39	0.0821	1421	0.982	0.918	16633	0.996	-4.37	8	-1.16	0.123	2032	0.975	0.877	16023	0.988
SCT	-5.34	8	-1.39	0.0822	1422	0.982	0.918	16632	0.996	-6.99	8	-1.89	0.0295	505	0.975	0.971	17550	0.998
RMND5A	-5.33	8	-1.39	0.0822	1423	0.982	0.918	16631	0.996	-1.7	8	-0.42	0.338	5845	0.975	0.662	12210	0.977
TMEM242	-5.33	8	-1.39	0.0822	1424	0.982	0.918	16630	0.996	-4.37	8	-1.16	0.123	2033	0.975	0.877	16022	0.988
MAEA	-5.33	8	-1.39	0.0823	1425	0.982	0.918	16629	0.996	-2.16	8	-0.54	0.293	5008	0.975	0.707	13047	0.978
ATP4A	-5.33	8	-1.39	0.0824	1426	0.982	0.918	16628	0.996	-2.49	8	-0.64	0.262	4439	0.975	0.738	13616	0.978
CD200R1L	-5.33	8	-1.39	0.0825	1427	0.982	0.917	16627	0.996	-5.15	8	-1.38	0.0842	1374	0.975	0.916	16681	0.991
SCGB1D4	-5.33	8	-1.39	0.0826	1428	0.982	0.917	16626	0.996	-4.7	8	-1.25	0.105	1733	0.975	0.895	16322	0.989
TMEM236	-5.32	8	-1.39	0.0828	1429	0.982	0.917	16625	0.996	-3.15	8	-0.82	0.206	3459	0.975	0.794	14596	0.981
HCAR2	-5.32	8	-1.39	0.0828	1430	0.982	0.917	16624	0.996	-3.68	8	-0.97	0.167	2790	0.975	0.833	15265	0.985
RGS21	-5.32	8	-1.39	0.0829	1431	0.982	0.917	16623	0.996	-3.17	8	-0.83	0.204	3410	0.975	0.796	14645	0.981
GPR83	-5.32	8	-1.39	0.0829	1432	0.982	0.917	16622	0.996	-8.34	8	-2.26	0.0118	228	0.929	0.988	17827	1
MYCBP2	-5.32	8	-1.39	0.083	1433	0.982	0.917	16621	0.996	-3.37	8	-0.88	0.189	3150	0.975	0.811	14905	0.982
OR52K1	-5.32	8	-1.39	0.083	1434	0.982	0.917	16620	0.996	-6.52	8	-1.76	0.0393	657	0.975	0.961	17398	0.997
ADAMTS18	-5.31	8	-1.38	0.0831	1435	0.982	0.917	16619	0.996	-6.94	8	-1.88	0.0304	518	0.975	0.97	17537	0.998
NEK5	-5.31	8	-1.38	0.0833	1436	0.982	0.917	16618	0.996	1.89	8	0.58	0.719	13304	0.975	0.281	4751	0.977
BIVM	-5.31	8	-1.38	0.0833	1437	0.982	0.917	16617	0.996	-4.99	8	-1.33	0.0914	1497	0.975	0.909	16558	0.991
GPR142	-5.31	8	-1.38	0.0834	1438	0.982	0.917	16616	0.996	-1.35	8	-0.32	0.374	6582	0.975	0.626	11473	0.977
SEZ6L	-5.31	8	-1.38	0.0834	1439	0.982	0.917	16615	0.996	0	8	0.05	0.522	9454	0.975	0.478	8601	0.977
HOXB9	-5.3	8	-1.38	0.0835	1440	0.982	0.917	16614	0.996	-2.47	8	-0.63	0.264	4488	0.975	0.736	13567	0.978
DECR2	-5.3	8	-1.38	0.0836	1441	0.982	0.916	16613	0.996	-3.99	8	-1.05	0.146	2417	0.975	0.854	15638	0.986
AMACR	-5.3	8	-1.38	0.0836	1442	0.982	0.916	16612	0.996	-4.62	8	-1.23	0.11	1806	0.975	0.89	16249	0.989
RRP36	-5.3	8	-1.38	0.0838	1443	0.982	0.916	16611	0.996	-2.85	8	-0.74	0.23	3884	0.975	0.77	14171	0.98
TASP1	-5.3	8	-1.38	0.0838	1444	0.982	0.916	16610	0.996	-2.29	8	-0.58	0.281	4784	0.975	0.719	13271	0.978
C11orf49	-5.29	8	-1.38	0.0839	1445	0.982	0.916	16609	0.996	-6.68	8	-1.8	0.0357	602	0.975	0.964	17453	0.997
KIAA1257	-5.29	8	-1.38	0.0839	1446	0.982	0.916	16608	0.996	-1.47	8	-0.35	0.362	6330	0.975	0.638	11725	0.977
MBNL2	-5.29	8	-1.38	0.084	1447	0.982	0.916	16607	0.996	-2.6	8	-0.67	0.252	4284	0.975	0.748	13771	0.979
CYP4A22	-2.65	2	-1.38	0.084	1448	0.982	0.916	16606	0.996	-0.83	2	-0.41	0.342	5931	0.975	0.658	12124	0.977
SRSF2	-5.29	8	-1.38	0.0841	1449	0.982	0.916	16605	0.996	-4.7	8	-1.25	0.106	1739	0.975	0.894	16316	0.989
ENOX1	-5.29	8	-1.38	0.0842	1450	0.982	0.916	16604	0.996	-5.63	8	-1.51	0.0657	1111	0.975	0.934	16944	0.995
ITGBL1	-5.29	8	-1.38	0.0843	1451	0.982	0.916	16603	0.996	-3.26	8	-0.85	0.197	3288	0.975	0.803	14767	0.981
CT47B1	-5.28	8	-1.38	0.0844	1452	0.982	0.916	16602	0.996	-3.78	8	-1	0.16	2665	0.975	0.84	15390	0.985
CDK16	-5.28	8	-1.38	0.0845	1453	0.982	0.916	16601	0.996	-4.23	8	-1.12	0.131	2164	0.975	0.869	15891	0.987
ARL6IP5	-5.28	8	-1.38	0.0845	1454	0.982	0.916	16600	0.996	-1.91	8	-0.48	0.317	5456	0.975	0.683	12599	0.977
MYL7	-5.28	8	-1.38	0.0845	1455	0.982	0.915	16599	0.996	-7.74	8	-2.1	0.018	320	0.975	0.982	17735	1
PNN	-5.28	8	-1.38	0.0845	1456	0.982	0.915	16598	0.996	-7.66	8	-2.07	0.0191	343	0.975	0.981	17712	1
BACH1	-5.27	8	-1.37	0.0849	1457	0.982	0.915	16597	0.995	-3.03	8	-0.79	0.216	3620	0.975	0.784	14435	0.981
OVCH1	-5.27	8	-1.37	0.0849	1458	0.982	0.915	16596	0.995	-3.66	8	-0.96	0.168	2819	0.975	0.832	15236	0.985
KLHDC7A	-5.27	8	-1.37	0.0851	1459	0.982	0.915	16595	0.995	-3.04	8	-0.79	0.215	3607	0.975	0.785	14448	0.981
RETNLB	-5.27	8	-1.37	0.0851	1460	0.982	0.915	16594	0.995	-3.58	8	-0.94	0.173	2899	0.975	0.827	15156	0.985
OTC	-5.27	8	-1.37	0.0851	1461	0.982	0.915	16593	0.995	-1.94	8	-0.48	0.315	5414	0.975	0.685	12641	0.977
LDLRAP1	-5.27	8	-1.37	0.0851	1462	0.982	0.915	16592	0.995	-2.99	8	-0.78	0.219	3678	0.975	0.781	14377	0.981
NMI	-5.26	8	-1.37	0.0852	1463	0.982	0.915	16591	0.995	-2.32	8	-0.59	0.278	4739	0.975	0.722	13316	0.978
CETN2	-5.26	8	-1.37	0.0853	1464	0.982	0.915	16590	0.995	-4.13	8	-1.09	0.137	2278	0.975	0.863	15777	0.987
GPRC6A	-5.26	8	-1.37	0.0854	1465	0.982	0.915	16589	0.995	-4.93	8	-1.32	0.0942	1552	0.975	0.906	16503	0.99
CARS	-5.26	8	-1.37	0.0854	1466	0.982	0.915	16588	0.995	-2.53	8	-0.65	0.259	4385	0.975	0.741	13670	0.979
SFXN1	-5.26	8	-1.37	0.0854	1467	0.982	0.915	16587	0.995	-2.9	8	-0.75	0.227	3804	0.975	0.773	14251	0.98
GPR116	-5.26	8	-1.37	0.0854	1468	0.982	0.915	16586	0.995	-4.63	8	-1.23	0.109	1800	0.975	0.891	16255	0.989
AARS	-5.26	8	-1.37	0.0854	1469	0.982	0.915	16585	0.995	-3.33	8	-0.87	0.192	3202	0.975	0.808	14853	0.982
PHLDB2	-5.26	8	-1.37	0.0856	1470	0.982	0.914	16584	0.995	-5.51	8	-1.48	0.0698	1158	0.975	0.93	16897	0.994
EDA2R	-5.25	8	-1.37	0.0858	1471	0.982	0.914	16583	0.995	-1.62	8	-0.39	0.347	6026	0.975	0.653	12029	0.977
OR2A14	-5.25	8	-1.37	0.0858	1472	0.982	0.914	16582	0.995	-1.29	8	-0.3	0.381	6738	0.975	0.619	11317	0.977
RNF214	-5.25	8	-1.37	0.0858	1473	0.982	0.914	16581	0.995	-2.52	8	-0.64	0.26	4404	0.975	0.74	13651	0.979
ATRAID	-5.25	8	-1.37	0.0859	1474	0.982	0.914	16580	0.995	-2.14	8	-0.54	0.295	5044	0.975	0.705	13011	0.978
RHOG	-5.25	8	-1.37	0.0859	1475	0.982	0.914	16579	0.995	-4.82	8	-1.28	0.0996	1640	0.975	0.9	16415	0.99
PDAP1	-5.25	8	-1.37	0.086	1476	0.982	0.914	16578	0.995	-4.91	8	-1.31	0.095	1564	0.975	0.905	16491	0.99
AC016757.3	-5.24	8	-1.37	0.086	1477	0.982	0.914	16577	0.995	-2.12	8	-0.53	0.297	5082	0.975	0.703	12973	0.978
GLYATL3	-5.24	8	-1.36	0.0862	1478	0.982	0.914	16576	0.995	-5.01	8	-1.34	0.0903	1481	0.975	0.91	16574	0.991
ABCC4	-5.24	8	-1.36	0.0863	1479	0.982	0.914	16575	0.995	-1.11	8	-0.25	0.4	7106	0.975	0.6	10949	0.977
CAPN7	-5.24	8	-1.36	0.0863	1480	0.982	0.914	16574	0.995	-6.17	8	-1.66	0.0483	818	0.975	0.952	17237	0.996
MZT2B	-5.24	8	-1.36	0.0863	1481	0.982	0.914	16573	0.995	0.27	8	0.13	0.552	10056	0.975	0.448	7999	0.977
IQCF1	-5.24	8	-1.36	0.0864	1482	0.982	0.914	16572	0.995	-6.62	8	-1.79	0.0371	621	0.975	0.963	17434	0.997
DOLK	-5.23	8	-1.36	0.0865	1483	0.982	0.913	16571	0.995	-6.19	8	-1.67	0.0478	809	0.975	0.952	17246	0.996
HOXB13	-5.23	8	-1.36	0.0865	1484	0.982	0.913	16570	0.995	-5.88	8	-1.58	0.0571	946	0.975	0.943	17109	0.995
RPS6KB1	-5.23	8	-1.36	0.0866	1485	0.982	0.913	16569	0.995	-6.49	8	-1.75	0.0401	670	0.975	0.96	17385	0.997
NFE2	-5.23	8	-1.36	0.0869	1486	0.982	0.913	16568	0.995	-2.67	8	-0.69	0.247	4166	0.975	0.753	13889	0.979
TBX18	-5.22	8	-1.36	0.087	1487	0.982	0.913	16567	0.995	-4.94	8	-1.32	0.0936	1534	0.975	0.906	16521	0.99
AP5B1	-5.22	8	-1.36	0.087	1488	0.982	0.913	16566	0.995	-1.03	8	-0.23	0.409	7265	0.975	0.591	10790	0.977
CA9	-5.22	8	-1.36	0.0871	1489	0.982	0.913	16565	0.995	-1.69	8	-0.41	0.34	5872	0.975	0.66	12183	0.977
PKN2	-5.22	8	-1.36	0.0871	1490	0.982	0.913	16564	0.995	-0.39	8	-0.05	0.479	8605	0.975	0.521	9450	0.977
ELMO1	-5.22	8	-1.36	0.0872	1491	0.982	0.913	16563	0.995	-4.11	8	-1.09	0.138	2299	0.975	0.862	15756	0.987
RETN	-4.52	6	-1.36	0.0872	1492	0.982	0.913	16562	0.995	-2.13	6	-0.63	0.265	4506	0.975	0.735	13549	0.978
OR4X1	-5.22	8	-1.36	0.0873	1493	0.982	0.913	16561	0.995	-9.89	8	-2.69	0.00352	89	0.702	0.996	17966	1
POU4F2	-5.21	8	-1.36	0.0874	1494	0.982	0.913	16560	0.995	0.4	8	0.17	0.566	10327	0.975	0.434	7728	0.977
ANP32A	-5.21	8	-1.36	0.0874	1495	0.982	0.913	16559	0.995	-5.98	8	-1.61	0.0541	903	0.975	0.946	17152	0.996
C16orf58	-5.21	8	-1.36	0.0874	1496	0.982	0.913	16558	0.995	-2.68	8	-0.69	0.246	4149	0.975	0.754	13906	0.979
IL10RA	-5.21	8	-1.36	0.0874	1497	0.982	0.913	16557	0.995	-1.72	8	-0.42	0.336	5810	0.975	0.664	12245	0.977
BUB3	-5.21	8	-1.36	0.0875	1498	0.982	0.913	16556	0.995	-8.64	8	-2.35	0.00943	187	0.896	0.991	17868	1
CD163	-4.51	6	-1.36	0.0875	1499	0.982	0.913	16555	0.995	-2.56	6	-0.77	0.222	3726	0.975	0.778	14329	0.981
MUC17	-5.21	8	-1.36	0.0876	1500	0.982	0.912	16554	0.995	-4.07	8	-1.08	0.141	2338	0.975	0.859	15717	0.987
PFKFB1	-5.2	8	-1.35	0.0878	1501	0.982	0.912	16553	0.995	-7.44	8	-2.01	0.022	374	0.975	0.978	17681	0.999
FRMD7	-5.2	8	-1.35	0.0878	1502	0.982	0.912	16552	0.995	-3.98	8	-1.05	0.147	2431	0.975	0.853	15624	0.986
LRRC17	-5.2	8	-1.35	0.0878	1503	0.982	0.912	16551	0.995	-6.31	8	-1.7	0.0447	745	0.975	0.955	17310	0.996
KIF9	-5.2	8	-1.35	0.0878	1504	0.982	0.912	16550	0.995	-1.34	8	-0.32	0.375	6606	0.975	0.625	11449	0.977
LRP5L	-5.2	8	-1.35	0.0879	1505	0.982	0.912	16549	0.995	-4.05	8	-1.07	0.142	2364	0.975	0.858	15691	0.986
FOLR2	-5.2	8	-1.35	0.0879	1506	0.982	0.912	16548	0.995	-1.7	8	-0.42	0.338	5843	0.975	0.662	12212	0.977
PMPCA	-5.2	8	-1.35	0.088	1507	0.982	0.912	16547	0.995	-7.13	8	-1.93	0.027	460	0.975	0.973	17595	0.998
RPLP1	-3.68	4	-1.35	0.0881	1508	0.982	0.912	16546	0.995	0.97	4	0.44	0.669	12346	0.975	0.331	5709	0.977
ATG7	-5.2	8	-1.35	0.0881	1509	0.982	0.912	16545	0.995	-3.01	8	-0.78	0.218	3659	0.975	0.782	14396	0.981
APOBEC1	-5.2	8	-1.35	0.0881	1510	0.982	0.912	16544	0.995	-4.44	8	-1.18	0.119	1958	0.975	0.881	16097	0.988
NUDT8	-4.5	6	-1.35	0.0881	1511	0.982	0.912	16543	0.995	-3.83	6	-1.17	0.12	1978	0.975	0.88	16077	0.988
COX6A1	-4.5	6	-1.35	0.0882	1512	0.982	0.912	16542	0.995	-2.43	6	-0.72	0.234	3950	0.975	0.766	14105	0.98
SLC2A11	-5.19	8	-1.35	0.0883	1513	0.982	0.912	16541	0.995	1.17	8	0.38	0.648	11917	0.975	0.352	6138	0.977
ACAT2	-5.19	8	-1.35	0.0883	1514	0.982	0.912	16540	0.995	-2.87	8	-0.74	0.229	3844	0.975	0.771	14211	0.98
C11orf85	-5.19	8	-1.35	0.0883	1515	0.982	0.912	16539	0.995	-7.76	8	-2.1	0.0178	317	0.975	0.982	17738	1
DNAJB2	-5.19	8	-1.35	0.0884	1516	0.982	0.912	16538	0.995	-4.18	8	-1.11	0.134	2229	0.975	0.866	15826	0.987
LILRA4	-5.19	8	-1.35	0.0885	1517	0.982	0.912	16537	0.995	-3.75	8	-0.99	0.162	2705	0.975	0.838	15350	0.985
TREM2	-5.19	8	-1.35	0.0885	1518	0.982	0.912	16536	0.995	-4.29	8	-1.14	0.128	2114	0.975	0.872	15941	0.988
ZDHHC7	-5.19	8	-1.35	0.0885	1519	0.982	0.912	16535	0.995	-2.69	8	-0.69	0.244	4126	0.975	0.756	13929	0.98
MCHR1	-5.19	8	-1.35	0.0886	1520	0.982	0.911	16534	0.995	-1.78	8	-0.44	0.33	5699	0.975	0.67	12356	0.977
IQCB1	-5.19	8	-1.35	0.0887	1521	0.982	0.911	16533	0.995	-5.41	8	-1.45	0.0735	1218	0.975	0.926	16837	0.993
PTCHD4	-5.18	8	-1.35	0.0888	1522	0.982	0.911	16532	0.995	-4.65	8	-1.24	0.108	1778	0.975	0.892	16277	0.989
SIPA1L1	-5.18	8	-1.35	0.0889	1523	0.982	0.911	16531	0.995	-3.62	8	-0.95	0.171	2863	0.975	0.829	15192	0.985
CADPS2	-5.18	8	-1.35	0.089	1524	0.982	0.911	16530	0.995	-6.09	8	-1.64	0.0508	864	0.975	0.949	17191	0.996
GIMAP7	-5.18	8	-1.35	0.089	1525	0.982	0.911	16529	0.995	-5.41	8	-1.45	0.0737	1219	0.975	0.926	16836	0.993
ZNF800	-5.17	8	-1.35	0.0892	1526	0.982	0.911	16528	0.995	-3.09	8	-0.8	0.211	3554	0.975	0.789	14501	0.981
NDST3	-5.17	8	-1.35	0.0892	1527	0.982	0.911	16527	0.995	-1.96	8	-0.49	0.313	5369	0.975	0.687	12686	0.977
LCN2	-5.17	8	-1.35	0.0893	1528	0.982	0.911	16526	0.995	-5.86	8	-1.57	0.0578	960	0.975	0.942	17095	0.995
PTPDC1	-5.17	8	-1.34	0.0894	1529	0.982	0.911	16525	0.995	-2.14	8	-0.54	0.295	5031	0.975	0.705	13024	0.978
SRCRB4D	-5.17	8	-1.34	0.0895	1530	0.982	0.911	16524	0.995	-2.62	8	-0.67	0.25	4249	0.975	0.75	13806	0.979
WIPF3	-5.16	8	-1.34	0.0896	1531	0.982	0.91	16523	0.995	-4.79	8	-1.27	0.101	1659	0.975	0.899	16396	0.99
ENDOV	-5.16	8	-1.34	0.0896	1532	0.982	0.91	16522	0.995	-5.82	8	-1.56	0.059	981	0.975	0.941	17074	0.995
ORAI2	-5.16	8	-1.34	0.0897	1533	0.982	0.91	16521	0.995	-5.79	8	-1.55	0.06	998	0.975	0.94	17057	0.995
C6orf223	-5.16	8	-1.34	0.0898	1534	0.982	0.91	16520	0.995	-1.08	8	-0.24	0.404	7173	0.975	0.596	10882	0.977
NR1I2	-5.16	8	-1.34	0.0899	1535	0.982	0.91	16519	0.995	-6.74	8	-1.82	0.0345	579	0.975	0.966	17476	0.997
CCDC97	-5.16	8	-1.34	0.0899	1536	0.982	0.91	16518	0.995	-2.07	8	-0.52	0.301	5151	0.975	0.699	12904	0.978
DONSON	-5.16	8	-1.34	0.09	1537	0.982	0.91	16517	0.995	-2.61	8	-0.67	0.251	4270	0.975	0.749	13785	0.979
CATSPER2	-5.16	8	-1.34	0.09	1538	0.982	0.91	16516	0.995	-0.68	8	-0.13	0.447	8018	0.975	0.553	10037	0.977
TRAF3IP2	-5.16	8	-1.34	0.09	1539	0.982	0.91	16515	0.995	-3.77	8	-0.99	0.16	2682	0.975	0.84	15373	0.985
MAGI1	-5.15	8	-1.34	0.09	1540	0.982	0.91	16514	0.995	-5.27	8	-1.41	0.0793	1303	0.975	0.921	16752	0.992
DEDD2	-5.15	8	-1.34	0.09	1541	0.982	0.91	16513	0.995	-1.98	8	-0.49	0.311	5334	0.975	0.689	12721	0.977
BEX2	-3.64	4	-1.34	0.0901	1542	0.982	0.91	16512	0.995	-3.04	4	-1.14	0.127	2103	0.975	0.873	15952	0.988
HIGD1C	-5.15	8	-1.34	0.0902	1543	0.982	0.91	16511	0.995	-7.13	8	-1.93	0.027	458	0.975	0.973	17597	0.998
MTHFS	-5.15	8	-1.34	0.0903	1544	0.982	0.91	16510	0.995	-0.43	8	-0.06	0.475	8535	0.975	0.525	9520	0.977
C15orf48	-5.15	8	-1.34	0.0903	1545	0.982	0.91	16509	0.995	-3.66	8	-0.96	0.168	2820	0.975	0.832	15235	0.985
OSR1	-5.15	8	-1.34	0.0903	1546	0.982	0.91	16508	0.995	-5.95	8	-1.6	0.055	916	0.975	0.945	17139	0.995
ENHO	-5.15	8	-1.34	0.0903	1547	0.982	0.91	16507	0.995	-6.98	8	-1.88	0.0297	509	0.975	0.97	17546	0.998
HAS3	-5.15	8	-1.34	0.0903	1548	0.982	0.91	16506	0.995	-5.34	8	-1.43	0.0764	1258	0.975	0.924	16797	0.993
USP22	-5.14	8	-1.34	0.0906	1549	0.982	0.909	16505	0.995	-4.2	8	-1.11	0.133	2194	0.975	0.867	15861	0.987
RPRM	-5.14	8	-1.34	0.0906	1550	0.982	0.909	16504	0.995	-4.62	8	-1.23	0.11	1807	0.975	0.89	16248	0.989
MMACHC	-5.14	8	-1.34	0.0906	1551	0.982	0.909	16503	0.995	-6.04	8	-1.62	0.0521	886	0.975	0.948	17169	0.996
HOXA7	-5.14	8	-1.34	0.0906	1552	0.982	0.909	16502	0.995	-3.74	8	-0.98	0.163	2720	0.975	0.837	15335	0.985
CPM	-5.14	8	-1.34	0.0907	1553	0.982	0.909	16501	0.995	-1.48	8	-0.36	0.361	6310	0.975	0.639	11745	0.977
RAB9A	-5.14	8	-1.34	0.0909	1554	0.982	0.909	16500	0.995	-3.42	8	-0.9	0.185	3086	0.975	0.815	14969	0.983
SIX2	-5.13	8	-1.33	0.091	1555	0.982	0.909	16499	0.995	-0.34	8	-0.04	0.485	8725	0.975	0.515	9330	0.977
GNA11	-5.13	8	-1.33	0.0911	1556	0.982	0.909	16498	0.995	-5.71	8	-1.53	0.0627	1051	0.975	0.937	17004	0.995
EPHA1	-5.13	8	-1.33	0.0913	1557	0.982	0.909	16497	0.994	-1.99	8	-0.5	0.31	5317	0.975	0.69	12738	0.977
MTF2	-5.12	8	-1.33	0.0914	1558	0.982	0.909	16496	0.994	-2.42	8	-0.62	0.269	4582	0.975	0.731	13473	0.978
CNDP2	-5.12	8	-1.33	0.0915	1559	0.982	0.909	16495	0.994	-5.74	8	-1.54	0.0616	1034	0.975	0.938	17021	0.995
PITPNC1	-5.12	8	-1.33	0.0916	1560	0.982	0.908	16494	0.994	-2.11	8	-0.53	0.298	5098	0.975	0.702	12957	0.978
DZIP3	-5.12	8	-1.33	0.0917	1561	0.982	0.908	16493	0.994	-5.23	8	-1.4	0.0808	1323	0.975	0.919	16732	0.992
AKR7A2	-5.12	8	-1.33	0.0917	1562	0.982	0.908	16492	0.994	-2.32	8	-0.59	0.278	4738	0.975	0.722	13317	0.978
CD37	-5.12	8	-1.33	0.0917	1563	0.982	0.908	16491	0.994	-4.99	8	-1.33	0.0915	1500	0.975	0.908	16555	0.991
TIGD3	-5.12	8	-1.33	0.0918	1564	0.982	0.908	16490	0.994	-7.54	8	-2.04	0.0207	355	0.975	0.979	17700	0.999
SYNJ2	-5.12	8	-1.33	0.0918	1565	0.982	0.908	16489	0.994	-4.22	8	-1.12	0.132	2178	0.975	0.868	15877	0.987
MLANA	-5.11	8	-1.33	0.0918	1566	0.982	0.908	16488	0.994	-5.67	8	-1.52	0.0641	1076	0.975	0.936	16979	0.995
GPX5	-5.11	8	-1.33	0.0918	1567	0.982	0.908	16487	0.994	-4.91	8	-1.31	0.095	1563	0.975	0.905	16492	0.99
ZNF550	-5.11	8	-1.33	0.0919	1568	0.982	0.908	16486	0.994	-4.22	8	-1.12	0.132	2174	0.975	0.868	15881	0.987
CCDC130	-5.11	8	-1.33	0.0919	1569	0.982	0.908	16485	0.994	-3.28	8	-0.86	0.196	3264	0.975	0.804	14791	0.981
GULP1	-5.11	8	-1.33	0.0919	1570	0.982	0.908	16484	0.994	1.74	8	0.54	0.705	13034	0.975	0.295	5021	0.977
EPB41L4B	-5.11	8	-1.33	0.0921	1571	0.982	0.908	16483	0.994	-2.58	8	-0.66	0.254	4317	0.975	0.746	13738	0.979
MED7	-4.42	6	-1.33	0.0922	1572	0.982	0.908	16482	0.994	-0.67	6	-0.16	0.437	7832	0.975	0.563	10223	0.977
FBXL20	-5.11	8	-1.33	0.0922	1573	0.982	0.908	16481	0.994	-4.66	8	-1.24	0.108	1772	0.975	0.892	16283	0.989
CNTF	-5.11	8	-1.33	0.0922	1574	0.982	0.908	16480	0.994	-3.31	8	-0.87	0.193	3211	0.975	0.807	14844	0.981
SOCS1	-5.11	8	-1.33	0.0922	1575	0.982	0.908	16479	0.994	-4.27	8	-1.13	0.129	2130	0.975	0.871	15925	0.987
PRR23B	-5.1	8	-1.33	0.0923	1576	0.982	0.908	16478	0.994	-2.73	8	-0.7	0.241	4076	0.975	0.759	13979	0.98
PAK3	-5.1	8	-1.33	0.0923	1577	0.982	0.908	16477	0.994	-5.13	8	-1.37	0.0851	1391	0.975	0.915	16664	0.991
FLNA	-5.1	8	-1.33	0.0924	1578	0.982	0.908	16476	0.994	-6.67	8	-1.8	0.0361	608	0.975	0.964	17447	0.997
ARID2	-5.1	8	-1.33	0.0924	1579	0.982	0.908	16475	0.994	-6.5	8	-1.75	0.0399	667	0.975	0.96	17388	0.997
PP2D1	-4.77	7	-1.33	0.0925	1580	0.982	0.908	16474	0.994	-3.53	7	-0.99	0.16	2680	0.975	0.84	15375	0.985
NUGGC	-5.1	8	-1.33	0.0925	1581	0.982	0.907	16473	0.994	-2.86	8	-0.74	0.23	3876	0.975	0.77	14179	0.98
LGR4	-5.1	8	-1.33	0.0926	1582	0.982	0.907	16472	0.994	-4.17	8	-1.1	0.135	2237	0.975	0.865	15818	0.987
USH1C	-5.1	8	-1.32	0.0927	1583	0.982	0.907	16471	0.994	-2.17	8	-0.55	0.292	4980	0.975	0.708	13075	0.978
DYNLT3	-5.1	8	-1.32	0.0927	1584	0.982	0.907	16470	0.994	-4.12	8	-1.09	0.138	2289	0.975	0.862	15766	0.987
GBA2	-5.1	8	-1.32	0.0927	1585	0.982	0.907	16469	0.994	-3.8	8	-1	0.159	2643	0.975	0.841	15412	0.985
TMEM9B	-5.09	8	-1.32	0.0928	1586	0.982	0.907	16468	0.994	-5.5	8	-1.47	0.0705	1167	0.975	0.93	16888	0.994
KLHL42	-5.09	8	-1.32	0.0928	1587	0.982	0.907	16467	0.994	-4.48	8	-1.19	0.117	1929	0.975	0.883	16126	0.988
MSRA	-5.09	8	-1.32	0.0928	1588	0.982	0.907	16466	0.994	-0.84	8	-0.18	0.429	7661	0.975	0.571	10394	0.977
MRPL42	-5.09	8	-1.32	0.0928	1589	0.982	0.907	16465	0.994	1.12	8	0.37	0.643	11805	0.975	0.357	6250	0.977
GIF	-5.09	8	-1.32	0.0929	1590	0.982	0.907	16464	0.994	-6.1	8	-1.64	0.0504	854	0.975	0.95	17201	0.996
TULP4	-5.09	8	-1.32	0.0931	1591	0.982	0.907	16463	0.994	-1.86	8	-0.46	0.322	5546	0.975	0.678	12509	0.977
PYROXD2	-5.08	8	-1.32	0.0932	1592	0.982	0.907	16462	0.994	-6.04	8	-1.62	0.0521	884	0.975	0.948	17171	0.996
CFL2	-5.08	8	-1.32	0.0933	1593	0.982	0.907	16461	0.994	-6.32	8	-1.7	0.0443	742	0.975	0.956	17313	0.997
SLC45A4	-5.08	8	-1.32	0.0933	1594	0.982	0.907	16460	0.994	-3.63	8	-0.95	0.17	2854	0.975	0.83	15201	0.985
TIMP2	-5.08	8	-1.32	0.0935	1595	0.982	0.906	16459	0.994	-5.92	8	-1.59	0.0559	931	0.975	0.944	17124	0.995
SERPIND1	-5.08	8	-1.32	0.0936	1596	0.982	0.906	16458	0.994	-6.58	8	-1.77	0.038	635	0.975	0.962	17420	0.997
SLC43A3	-5.08	8	-1.32	0.0936	1597	0.982	0.906	16457	0.994	-5.07	8	-1.35	0.0879	1438	0.975	0.912	16617	0.991
MUC20	-5.07	8	-1.32	0.0937	1598	0.982	0.906	16456	0.994	-3.91	8	-1.03	0.151	2511	0.975	0.849	15544	0.985
PSMA1	-5.07	8	-1.32	0.0938	1599	0.982	0.906	16455	0.994	-3.13	8	-0.81	0.208	3493	0.975	0.792	14562	0.981
MS4A12	-5.07	8	-1.32	0.0938	1600	0.982	0.906	16454	0.994	-6.26	8	-1.68	0.046	777	0.975	0.954	17278	0.996
PRNP	-5.07	8	-1.32	0.0939	1601	0.982	0.906	16453	0.994	-2.77	8	-0.71	0.237	4011	0.975	0.763	14044	0.98
ZNF169	-5.07	8	-1.32	0.094	1602	0.982	0.906	16452	0.994	-4.77	8	-1.27	0.102	1674	0.975	0.898	16381	0.99
C1QTNF8	-5.06	8	-1.32	0.0942	1603	0.982	0.906	16451	0.994	-0.31	8	-0.03	0.488	8780	0.975	0.512	9275	0.977
STRN3	-5.06	8	-1.32	0.0942	1604	0.982	0.906	16450	0.994	-1.44	8	-0.34	0.365	6383	0.975	0.635	11672	0.977
MSTO1	-5.06	8	-1.31	0.0943	1605	0.982	0.906	16449	0.994	-5.34	8	-1.43	0.0765	1261	0.975	0.923	16794	0.993
FAM98B	-5.06	8	-1.31	0.0943	1606	0.982	0.906	16448	0.994	-1.99	8	-0.5	0.31	5314	0.975	0.69	12741	0.977
GLDN	-4.38	6	-1.31	0.0943	1607	0.982	0.906	16447	0.994	-4.94	6	-1.53	0.063	1057	0.975	0.937	16998	0.995
ASCL4	-5.06	8	-1.31	0.0943	1608	0.982	0.906	16446	0.994	0.26	8	0.13	0.551	10030	0.975	0.449	8025	0.977
NAALADL1	-5.06	8	-1.31	0.0943	1609	0.982	0.906	16445	0.994	-6.45	8	-1.74	0.0411	686	0.975	0.959	17369	0.997
KIAA1551	-5.06	8	-1.31	0.0943	1610	0.982	0.906	16444	0.994	-2.05	8	-0.51	0.304	5190	0.975	0.696	12865	0.977
WFIKKN2	-5.06	8	-1.31	0.0945	1611	0.982	0.905	16443	0.994	-4.05	8	-1.07	0.142	2355	0.975	0.858	15700	0.986
IGF2	-5.06	8	-1.31	0.0946	1612	0.982	0.905	16442	0.994	-2.77	8	-0.71	0.238	4015	0.975	0.762	14040	0.98
PCDHA6	-5.05	8	-1.31	0.0946	1613	0.982	0.905	16441	0.994	-4.67	8	-1.24	0.107	1756	0.975	0.893	16299	0.989
ZNF596	-5.05	8	-1.31	0.0949	1614	0.982	0.905	16440	0.994	-2.75	8	-0.71	0.239	4044	0.975	0.761	14011	0.98
FTCDNL1	-5.05	8	-1.31	0.0949	1615	0.982	0.905	16439	0.994	-4.61	8	-1.23	0.11	1814	0.975	0.89	16241	0.989
ANKDD1A	-5.05	8	-1.31	0.0949	1616	0.982	0.905	16438	0.994	-4.48	8	-1.19	0.117	1926	0.975	0.883	16129	0.988
STK11	-5.05	8	-1.31	0.095	1617	0.982	0.905	16437	0.994	-6.23	8	-1.68	0.0469	795	0.975	0.953	17260	0.996
ZNF628	-5.05	8	-1.31	0.095	1618	0.982	0.905	16436	0.994	-1.74	8	-0.43	0.334	5776	0.975	0.666	12279	0.977
GRIK5	-5.04	8	-1.31	0.0952	1619	0.982	0.905	16435	0.994	-1.74	8	-0.43	0.334	5773	0.975	0.666	12282	0.977
KMT2A	-5.04	8	-1.31	0.0952	1620	0.982	0.905	16434	0.994	-4.16	8	-1.1	0.135	2247	0.975	0.865	15808	0.987
PAQR5	-5.04	8	-1.31	0.0953	1621	0.982	0.905	16433	0.994	-1.84	8	-0.46	0.325	5594	0.975	0.675	12461	0.977
PI15	-5.04	8	-1.31	0.0953	1622	0.982	0.905	16432	0.994	-2.38	8	-0.61	0.272	4641	0.975	0.728	13414	0.978
LRCH3	-5.04	8	-1.31	0.0954	1623	0.982	0.905	16431	0.994	-3.54	8	-0.93	0.177	2946	0.975	0.823	15109	0.984
SPCS1	-5.04	8	-1.31	0.0954	1624	0.982	0.905	16430	0.994	-3.17	8	-0.83	0.205	3417	0.975	0.795	14638	0.981
RASL10A	-5.03	8	-1.31	0.0956	1625	0.982	0.904	16429	0.994	-0.18	8	0	0.502	9065	0.975	0.498	8990	0.977
HMX1	-5.03	8	-1.31	0.0957	1626	0.982	0.904	16428	0.994	0.18	8	0.11	0.542	9840	0.975	0.458	8215	0.977
UNC13D	-5.03	8	-1.31	0.0957	1627	0.982	0.904	16427	0.994	-0.66	8	-0.13	0.449	8058	0.975	0.551	9997	0.977
DRD1	-5.03	8	-1.31	0.0959	1628	0.982	0.904	16426	0.994	-4.86	8	-1.29	0.0977	1608	0.975	0.902	16447	0.99
MUC21	-5.03	8	-1.31	0.0959	1629	0.982	0.904	16425	0.994	-2.41	8	-0.61	0.27	4591	0.975	0.73	13464	0.978
MITD1	-5.03	8	-1.3	0.096	1630	0.982	0.904	16424	0.994	-0.38	8	-0.05	0.48	8624	0.975	0.52	9431	0.977
LLPH	-4.35	6	-1.3	0.096	1631	0.982	0.904	16423	0.994	-3.83	6	-1.18	0.12	1975	0.975	0.88	16080	0.988
ZDHHC13	-5.02	8	-1.3	0.0961	1632	0.982	0.904	16422	0.994	-2.91	8	-0.75	0.226	3787	0.975	0.774	14268	0.98
ERMN	-5.02	8	-1.3	0.0962	1633	0.982	0.904	16421	0.994	-3.92	8	-1.03	0.151	2503	0.975	0.849	15552	0.985
PPP6C	-5.02	8	-1.3	0.0962	1634	0.982	0.904	16420	0.994	-1.39	8	-0.33	0.371	6495	0.975	0.629	11560	0.977
TRMT2A	-5.02	8	-1.3	0.0962	1635	0.982	0.904	16419	0.994	-4.08	8	-1.08	0.14	2327	0.975	0.86	15728	0.987
PATE3	-5.02	8	-1.3	0.0963	1636	0.982	0.904	16418	0.994	-6.12	8	-1.65	0.0498	844	0.975	0.95	17211	0.996
FAP	-5.02	8	-1.3	0.0963	1637	0.982	0.904	16417	0.994	-3.73	8	-0.98	0.164	2736	0.975	0.836	15319	0.985
PARPBP	-5.02	8	-1.3	0.0964	1638	0.982	0.904	16416	0.994	-3.37	8	-0.88	0.189	3155	0.975	0.811	14900	0.982
TRAK1	-5.02	8	-1.3	0.0964	1639	0.982	0.904	16415	0.994	-4.26	8	-1.13	0.13	2143	0.975	0.87	15912	0.987
LRRC47	-5.01	8	-1.3	0.0965	1640	0.982	0.904	16414	0.994	-5.01	8	-1.34	0.0903	1482	0.975	0.91	16573	0.991
EIF2D	-5.01	8	-1.3	0.0965	1641	0.982	0.904	16413	0.994	-1.62	8	-0.39	0.347	6029	0.975	0.653	12026	0.977
ZNF34	-5.01	8	-1.3	0.0965	1642	0.982	0.904	16412	0.994	-1.71	8	-0.42	0.337	5831	0.975	0.663	12224	0.977
ZBTB26	-5.01	8	-1.3	0.0965	1643	0.982	0.903	16411	0.994	-3.76	8	-0.99	0.161	2691	0.975	0.839	15364	0.985
MAP3K7CL	-5.01	8	-1.3	0.0965	1644	0.982	0.903	16410	0.994	-3.09	8	-0.8	0.211	3555	0.975	0.789	14500	0.981
GABRD	-5.01	8	-1.3	0.0966	1645	0.982	0.903	16409	0.994	-3.68	8	-0.97	0.167	2789	0.975	0.833	15266	0.985
MS4A6E	-5.01	8	-1.3	0.0967	1646	0.982	0.903	16408	0.994	-7.31	8	-1.98	0.024	408	0.975	0.976	17647	0.998
ECEL1	-5.01	8	-1.3	0.0967	1647	0.982	0.903	16407	0.994	-2.92	8	-0.76	0.225	3774	0.975	0.775	14281	0.98
PRMT2	-5.01	8	-1.3	0.0968	1648	0.982	0.903	16406	0.994	-1.51	8	-0.36	0.358	6232	0.975	0.642	11823	0.977
CHAD	-5	8	-1.3	0.097	1649	0.982	0.903	16405	0.994	-0.02	8	0.05	0.52	9398	0.975	0.48	8657	0.977
PTMS	-5	8	-1.3	0.097	1650	0.982	0.903	16404	0.994	-5.43	8	-1.45	0.0729	1212	0.975	0.927	16843	0.993
PLSCR5	-5	8	-1.3	0.0971	1651	0.982	0.903	16403	0.994	-5.61	8	-1.51	0.0661	1119	0.975	0.934	16936	0.995
HOXC8	-5	8	-1.3	0.0972	1652	0.982	0.903	16402	0.994	-4.55	8	-1.21	0.113	1863	0.975	0.887	16192	0.989
KIF4B	-5	8	-1.3	0.0972	1653	0.982	0.903	16401	0.994	-1.15	8	-0.26	0.396	7031	0.975	0.604	11024	0.977
MGAT2	-5	8	-1.3	0.0973	1654	0.982	0.903	16400	0.994	-5.74	8	-1.54	0.0617	1037	0.975	0.938	17018	0.995
IFNL1	-5	8	-1.3	0.0974	1655	0.982	0.903	16399	0.994	-5	8	-1.33	0.0912	1494	0.975	0.909	16561	0.991
RNFT1	-5	8	-1.3	0.0974	1656	0.982	0.903	16398	0.994	-0.67	8	-0.13	0.448	8031	0.975	0.552	10024	0.977
ZNF837	-4.99	8	-1.3	0.0975	1657	0.982	0.903	16397	0.994	-4.96	8	-1.32	0.0927	1518	0.975	0.907	16537	0.99
DYNC2LI1	-4.99	8	-1.3	0.0975	1658	0.982	0.903	16396	0.994	-2.62	8	-0.67	0.25	4252	0.975	0.75	13803	0.979
DSTYK	-4.99	8	-1.3	0.0975	1659	0.982	0.902	16395	0.994	-1.71	8	-0.42	0.337	5832	0.975	0.663	12223	0.977
PSD4	-4.99	8	-1.3	0.0976	1660	0.982	0.902	16394	0.994	-4.66	8	-1.24	0.107	1764	0.975	0.893	16291	0.989
ASIC5	-4.99	8	-1.29	0.0978	1661	0.982	0.902	16393	0.994	-4.78	8	-1.27	0.101	1660	0.975	0.899	16395	0.99
EHD4	-4.99	8	-1.29	0.0978	1662	0.982	0.902	16392	0.994	-3.52	8	-0.92	0.178	2965	0.975	0.822	15090	0.984
SLC35F2	-4.98	8	-1.29	0.098	1663	0.982	0.902	16391	0.993	-5.06	8	-1.35	0.0882	1446	0.975	0.912	16609	0.991
APOL3	-4.98	8	-1.29	0.0981	1664	0.982	0.902	16390	0.993	-1.29	8	-0.3	0.381	6726	0.975	0.619	11329	0.977
FAM169A	-4.98	8	-1.29	0.0982	1665	0.982	0.902	16389	0.993	-4.18	8	-1.11	0.134	2228	0.975	0.866	15827	0.987
RNF121	-4.98	8	-1.29	0.0982	1666	0.982	0.902	16388	0.993	-6.25	8	-1.68	0.0462	783	0.975	0.954	17272	0.996
PDK2	-4.98	8	-1.29	0.0983	1667	0.982	0.902	16387	0.993	-5.96	8	-1.6	0.0547	913	0.975	0.945	17142	0.995
COL11A1	-4.97	8	-1.29	0.0984	1668	0.982	0.902	16386	0.993	-3.74	8	-0.98	0.163	2723	0.975	0.837	15332	0.985
NEU1	-4.97	8	-1.29	0.0985	1669	0.982	0.901	16385	0.993	-2.33	8	-0.59	0.277	4719	0.975	0.723	13336	0.978
PDYN	-4.3	6	-1.29	0.0987	1670	0.982	0.901	16384	0.993	-2.65	6	-0.8	0.213	3588	0.975	0.787	14467	0.981
SIAH2	-4.97	8	-1.29	0.0988	1671	0.982	0.901	16383	0.993	-5.15	8	-1.38	0.0845	1382	0.975	0.915	16673	0.991
TCF20	-4.97	8	-1.29	0.0988	1672	0.982	0.901	16382	0.993	-0.72	8	-0.14	0.443	7947	0.975	0.557	10108	0.977
EMID1	-4.97	8	-1.29	0.0988	1673	0.982	0.901	16381	0.993	-0.96	8	-0.21	0.417	7420	0.975	0.583	10635	0.977
CDH22	-4.3	6	-1.29	0.0989	1674	0.982	0.901	16380	0.993	-0.25	6	-0.02	0.491	8847	0.975	0.509	9208	0.977
TTLL11	-4.96	8	-1.29	0.0989	1675	0.982	0.901	16379	0.993	-6.56	8	-1.77	0.0384	638	0.975	0.962	17417	0.997
PLEKHB1	-4.96	8	-1.29	0.0991	1676	0.982	0.901	16378	0.993	-5.24	8	-1.4	0.0804	1317	0.975	0.92	16738	0.992
QTRT1	-4.96	8	-1.29	0.0991	1677	0.982	0.901	16377	0.993	-4.18	8	-1.11	0.134	2217	0.975	0.866	15838	0.987
CERS3	-4.96	8	-1.29	0.0992	1678	0.982	0.901	16376	0.993	-3.08	8	-0.8	0.212	3569	0.975	0.788	14486	0.981
ZSWIM2	-4.96	8	-1.29	0.0993	1679	0.982	0.901	16375	0.993	-7.51	8	-2.03	0.021	356	0.975	0.979	17699	0.999
GABRA5	-4.96	8	-1.29	0.0993	1680	0.982	0.901	16374	0.993	-2.78	8	-0.72	0.237	4004	0.975	0.763	14051	0.98
KLHL4	-4.96	8	-1.29	0.0993	1681	0.982	0.901	16373	0.993	-0.87	8	-0.19	0.426	7607	0.975	0.574	10448	0.977
OTOP3	-4.95	8	-1.29	0.0994	1682	0.982	0.901	16372	0.993	-3.83	8	-1.01	0.157	2604	0.975	0.843	15451	0.985
INCENP	-4.95	8	-1.28	0.0995	1683	0.982	0.901	16371	0.993	-1.68	8	-0.41	0.34	5886	0.975	0.66	12169	0.977
ALKBH3	-4.95	8	-1.28	0.0995	1684	0.982	0.901	16370	0.993	-5.45	8	-1.46	0.0723	1197	0.975	0.928	16858	0.993
CHORDC1	-4.95	8	-1.28	0.0995	1685	0.982	0.901	16369	0.993	-6.09	8	-1.64	0.0508	865	0.975	0.949	17190	0.996
C11orf91	-4.95	8	-1.28	0.0995	1686	0.982	0.9	16368	0.993	-2.3	8	-0.58	0.28	4768	0.975	0.72	13287	0.978
RPA1	-4.63	7	-1.28	0.0996	1687	0.982	0.9	16367	0.993	-2.53	8	-0.65	0.259	4384	0.975	0.741	13671	0.979
TMEM52B	-4.95	8	-1.28	0.0996	1688	0.982	0.9	16366	0.993	-2.39	8	-0.61	0.271	4621	0.975	0.729	13434	0.978
SLITRK3	-4.95	8	-1.28	0.0996	1689	0.982	0.9	16365	0.993	-3.22	8	-0.84	0.2	3345	0.975	0.8	14710	0.981
PLG	-4.95	8	-1.28	0.0997	1690	0.982	0.9	16364	0.993	-3.27	8	-0.85	0.197	3272	0.975	0.803	14783	0.981
CSNK1A1	-4.95	8	-1.28	0.0997	1691	0.982	0.9	16363	0.993	5.71	8	1.65	0.95	17177	0.998	0.05	878	0.977
FJX1	-4.95	8	-1.28	0.0998	1692	0.982	0.9	16362	0.993	-4.56	8	-1.21	0.113	1853	0.975	0.887	16202	0.989
CCDC146	-4.94	8	-1.28	0.0999	1693	0.982	0.9	16361	0.993	-5.68	8	-1.53	0.0636	1067	0.975	0.936	16988	0.995
OR5AN1	-4.94	8	-1.28	0.0999	1694	0.982	0.9	16360	0.993	-9.4	8	-2.56	0.00525	112	0.818	0.995	17943	1
DTNBP1	-4.94	8	-1.28	0.1	1695	0.982	0.9	16359	0.993	-1.9	8	-0.47	0.318	5473	0.975	0.682	12582	0.977
YPEL4	-4.94	8	-1.28	0.1	1696	0.982	0.9	16358	0.993	-4.31	8	-1.14	0.127	2096	0.975	0.873	15959	0.988
SLC25A47	-4.94	8	-1.28	0.1	1697	0.982	0.9	16357	0.993	-3.29	8	-0.86	0.195	3246	0.975	0.805	14809	0.981
TTF2	-4.94	8	-1.28	0.1	1698	0.982	0.9	16356	0.993	-1.19	8	-0.28	0.391	6926	0.975	0.609	11129	0.977
SAT1	-4.94	8	-1.28	0.1	1699	0.982	0.9	16355	0.993	-4.19	8	-1.11	0.134	2206	0.975	0.866	15849	0.987
SLC16A11	-4.94	8	-1.28	0.1	1700	0.982	0.9	16354	0.993	-9.1	8	-2.47	0.00668	144	0.824	0.993	17911	1
FGF3	-4.94	8	-1.28	0.1	1701	0.982	0.9	16353	0.993	-3.5	8	-0.92	0.179	2988	0.975	0.821	15067	0.984
LGALS14	-4.94	8	-1.28	0.1	1702	0.982	0.9	16352	0.993	-3.12	8	-0.81	0.209	3501	0.975	0.791	14554	0.981
WBP5	-4.27	6	-1.28	0.1	1703	0.982	0.9	16351	0.993	-2.25	6	-0.67	0.253	4294	0.975	0.747	13761	0.979
MYL10	-4.93	8	-1.28	0.1	1704	0.982	0.9	16350	0.993	-4.67	8	-1.24	0.107	1760	0.975	0.893	16295	0.989
PLEKHG2	-4.93	8	-1.28	0.1	1705	0.982	0.9	16349	0.993	-6.89	8	-1.86	0.0313	531	0.975	0.969	17524	0.998
RGS16	-4.93	8	-1.28	0.1	1706	0.982	0.9	16348	0.993	-0.26	8	-0.02	0.494	8912	0.975	0.506	9143	0.977
SESN3	-4.93	8	-1.28	0.101	1707	0.982	0.899	16347	0.993	-6.27	8	-1.69	0.0456	766	0.975	0.954	17289	0.996
USP15	-4.93	8	-1.28	0.101	1708	0.982	0.899	16346	0.993	-5.44	8	-1.46	0.0726	1201	0.975	0.927	16854	0.993
SIGLEC5	-4.93	8	-1.28	0.101	1709	0.982	0.899	16345	0.993	-4.4	8	-1.17	0.122	2002	0.975	0.878	16053	0.988
TLCD1	-4.93	8	-1.28	0.101	1710	0.982	0.899	16344	0.993	-2.48	8	-0.63	0.263	4466	0.975	0.737	13589	0.978
ARL2BP	-3.48	4	-1.28	0.101	1711	0.982	0.899	16343	0.993	-4.74	4	-1.81	0.0354	596	0.975	0.965	17459	0.997
GMPPB	-4.26	6	-1.28	0.101	1712	0.982	0.899	16342	0.993	-2.94	6	-0.89	0.187	3117	0.975	0.813	14938	0.983
PSMC1	-4.92	8	-1.28	0.101	1713	0.982	0.899	16341	0.993	-6.49	8	-1.75	0.0401	671	0.975	0.96	17384	0.997
ERP27	-4.92	8	-1.28	0.101	1714	0.982	0.899	16340	0.993	-2.47	8	-0.63	0.264	4480	0.975	0.736	13575	0.978
IGFBP5	-4.92	8	-1.28	0.101	1715	0.982	0.899	16339	0.993	-1.14	8	-0.26	0.397	7052	0.975	0.603	11003	0.977
AADACL4	-4.92	8	-1.28	0.101	1716	0.982	0.899	16338	0.993	-8.97	8	-2.44	0.00734	155	0.85	0.993	17900	1
GDF3	-4.92	8	-1.27	0.101	1717	0.982	0.899	16337	0.993	-1.72	8	-0.42	0.337	5820	0.975	0.663	12235	0.977
ARRB2	-4.92	8	-1.27	0.101	1718	0.982	0.899	16336	0.993	-9.3	8	-2.53	0.0057	125	0.818	0.994	17930	1
GPR84	-4.91	8	-1.27	0.101	1719	0.982	0.899	16335	0.993	-3.56	8	-0.93	0.175	2928	0.975	0.825	15127	0.985
GLI4	-4.91	8	-1.27	0.101	1720	0.982	0.899	16334	0.993	-0.67	8	-0.13	0.448	8030	0.975	0.552	10025	0.977
MS4A14	-4.91	8	-1.27	0.101	1721	0.982	0.899	16333	0.993	-4.38	8	-1.16	0.122	2019	0.975	0.878	16036	0.988
CEACAM4	-4.91	8	-1.27	0.102	1722	0.982	0.898	16332	0.993	-3.01	8	-0.78	0.218	3660	0.975	0.782	14395	0.981
SPRED3	-4.91	8	-1.27	0.102	1723	0.982	0.898	16331	0.993	-2.76	8	-0.71	0.238	4033	0.975	0.762	14022	0.98
EOMES	-4.91	8	-1.27	0.102	1724	0.982	0.898	16330	0.993	-3.35	8	-0.88	0.19	3180	0.975	0.81	14875	0.982
OR52N2	-4.91	8	-1.27	0.102	1725	0.982	0.898	16329	0.993	-6.16	8	-1.66	0.0487	822	0.975	0.951	17233	0.996
PRSS16	-4.91	8	-1.27	0.102	1726	0.982	0.898	16328	0.993	0.69	8	0.25	0.598	10964	0.975	0.402	7091	0.977
ZNF84	-4.91	8	-1.27	0.102	1727	0.982	0.898	16327	0.993	-2.99	8	-0.78	0.219	3673	0.975	0.781	14382	0.981
ZNF444	-4.9	8	-1.27	0.102	1728	0.982	0.898	16326	0.993	0.19	8	0.11	0.543	9855	0.975	0.457	8200	0.977
GPR35	-4.9	8	-1.27	0.102	1729	0.982	0.898	16325	0.993	-2.6	8	-0.67	0.252	4283	0.975	0.748	13772	0.979
GABBR2	-4.9	8	-1.27	0.102	1730	0.982	0.898	16324	0.993	-4.35	8	-1.15	0.124	2055	0.975	0.876	16000	0.988
IFNK	-4.9	8	-1.27	0.102	1731	0.982	0.898	16323	0.993	-4.18	8	-1.11	0.134	2225	0.975	0.866	15830	0.987
TYMP	-4.9	8	-1.27	0.102	1732	0.982	0.898	16322	0.993	-5.3	8	-1.42	0.0782	1286	0.975	0.922	16769	0.992
TADA2A	-4.9	8	-1.27	0.102	1733	0.982	0.898	16321	0.993	-4.03	8	-1.07	0.143	2375	0.975	0.857	15680	0.986
CD300LG	-4.9	8	-1.27	0.102	1734	0.982	0.898	16320	0.993	1.92	8	0.59	0.722	13357	0.975	0.278	4698	0.977
GPBAR1	-4.9	8	-1.27	0.102	1735	0.982	0.898	16319	0.993	-3.62	8	-0.95	0.171	2861	0.975	0.829	15194	0.985
MYL5	-4.9	8	-1.27	0.102	1736	0.982	0.898	16318	0.993	-1.08	8	-0.24	0.403	7169	0.975	0.597	10886	0.977
HMGXB4	-4.89	8	-1.27	0.102	1737	0.982	0.898	16317	0.993	-9.19	8	-2.5	0.00623	135	0.824	0.994	17920	1
C5orf22	-4.89	8	-1.27	0.102	1738	0.982	0.898	16316	0.993	-5.13	8	-1.37	0.0853	1394	0.975	0.915	16661	0.991
CCDC179	-2.44	2	-1.27	0.103	1739	0.982	0.897	16315	0.993	-2.66	2	-1.43	0.077	1267	0.975	0.923	16788	0.993
GREB1	-4.89	8	-1.27	0.103	1740	0.982	0.897	16314	0.993	-1.5	8	-0.36	0.359	6269	0.975	0.641	11786	0.977
NOS1	-4.89	8	-1.27	0.103	1741	0.982	0.897	16313	0.993	-5.89	8	-1.58	0.0569	943	0.975	0.943	17112	0.995
CNOT2	-4.88	8	-1.27	0.103	1742	0.982	0.897	16312	0.993	-3.97	8	-1.05	0.147	2434	0.975	0.853	15621	0.986
USH2A	-4.88	8	-1.27	0.103	1743	0.982	0.897	16311	0.993	-3.04	8	-0.79	0.215	3608	0.975	0.785	14447	0.981
PMPCB	-4.88	8	-1.27	0.103	1744	0.982	0.897	16310	0.993	-0.76	8	-0.16	0.438	7851	0.975	0.562	10204	0.977
FAM215A	-4.88	8	-1.27	0.103	1745	0.982	0.897	16309	0.993	-3.47	8	-0.91	0.182	3027	0.975	0.818	15028	0.983
XXYLT1	-4.88	8	-1.26	0.103	1746	0.982	0.897	16308	0.993	-7.36	8	-1.99	0.0232	392	0.975	0.977	17663	0.998
EFCAB3	-4.88	8	-1.26	0.103	1747	0.982	0.897	16307	0.993	-2.38	8	-0.61	0.273	4650	0.975	0.727	13405	0.978
HIBADH	-4.88	8	-1.26	0.103	1748	0.982	0.897	16306	0.993	-5.57	8	-1.49	0.0678	1140	0.975	0.932	16915	0.995
HEXDC	-4.88	8	-1.26	0.103	1749	0.982	0.897	16305	0.993	-2.3	8	-0.58	0.279	4762	0.975	0.721	13293	0.978
ZBTB33	-4.88	8	-1.26	0.103	1750	0.982	0.897	16304	0.993	-5.47	8	-1.47	0.0712	1174	0.975	0.929	16881	0.993
RPL31	-3.45	4	-1.26	0.103	1751	0.982	0.897	16303	0.993	-3.47	4	-1.31	0.0951	1566	0.975	0.905	16489	0.99
VSIG10L	-4.87	8	-1.26	0.103	1752	0.982	0.897	16302	0.993	-3.62	8	-0.95	0.171	2860	0.975	0.829	15195	0.985
WEE1	-4.87	8	-1.26	0.103	1753	0.982	0.897	16301	0.993	-2.64	8	-0.68	0.249	4211	0.975	0.751	13844	0.979
CNOT6	-4.87	8	-1.26	0.104	1754	0.982	0.896	16300	0.993	-1.47	8	-0.35	0.362	6340	0.975	0.638	11715	0.977
COL9A3	-4.86	8	-1.26	0.104	1755	0.982	0.896	16299	0.993	-0.23	8	-0.01	0.497	8963	0.975	0.503	9092	0.977
APOBEC3B	-4.86	8	-1.26	0.104	1756	0.982	0.896	16298	0.993	-4.9	8	-1.31	0.0955	1573	0.975	0.904	16482	0.99
TOMM20	-4.86	8	-1.26	0.104	1757	0.982	0.896	16297	0.993	-1.5	8	-0.36	0.359	6275	0.975	0.641	11780	0.977
TMEM216	-4.86	8	-1.26	0.104	1758	0.982	0.896	16296	0.993	-4.14	8	-1.1	0.136	2264	0.975	0.864	15791	0.987
NIP7	-4.86	8	-1.26	0.104	1759	0.982	0.896	16295	0.993	-2.93	8	-0.76	0.224	3755	0.975	0.776	14300	0.98
PPM1J	-4.86	8	-1.26	0.104	1760	0.982	0.896	16294	0.993	-1.67	8	-0.41	0.341	5911	0.975	0.659	12144	0.977
GRM5	-4.86	8	-1.26	0.104	1761	0.982	0.896	16293	0.993	-3.54	8	-0.93	0.177	2949	0.975	0.823	15106	0.984
C20orf62	-4.86	8	-1.26	0.104	1762	0.982	0.896	16292	0.993	-8.1	8	-2.2	0.014	261	0.967	0.986	17794	1
ADAMTS16	-4.86	8	-1.26	0.104	1763	0.982	0.896	16291	0.993	-5.49	8	-1.47	0.0705	1168	0.975	0.93	16887	0.994
GNB1	-4.86	8	-1.26	0.104	1764	0.982	0.896	16290	0.993	-6.26	8	-1.68	0.0461	781	0.975	0.954	17274	0.996
ZNF394	-4.85	8	-1.26	0.104	1765	0.982	0.896	16289	0.993	-0.92	8	-0.2	0.421	7507	0.975	0.579	10548	0.977
KLHL25	-4.85	8	-1.26	0.104	1766	0.982	0.896	16288	0.993	-0.7	8	-0.14	0.445	7981	0.975	0.555	10074	0.977
NXT2	-4.85	8	-1.26	0.104	1767	0.982	0.896	16287	0.993	-4.5	8	-1.2	0.116	1908	0.975	0.884	16147	0.988
GEMIN5	-4.85	8	-1.26	0.104	1768	0.982	0.896	16286	0.993	-7.51	8	-2.03	0.0211	358	0.975	0.979	17697	0.999
SYNE1	-4.85	8	-1.26	0.104	1769	0.982	0.896	16285	0.993	-2.23	8	-0.56	0.286	4883	0.975	0.714	13172	0.978
ITPR1	-4.85	8	-1.26	0.104	1770	0.982	0.896	16284	0.993	-3.08	8	-0.8	0.211	3564	0.975	0.789	14491	0.981
ATG2B	-4.85	8	-1.26	0.105	1771	0.982	0.895	16283	0.993	-4.22	8	-1.12	0.132	2175	0.975	0.868	15880	0.987
CHRNA7	-4.85	8	-1.26	0.105	1772	0.982	0.895	16282	0.993	-3.01	8	-0.78	0.217	3656	0.975	0.783	14399	0.981
DMXL2	-4.85	8	-1.26	0.105	1773	0.982	0.895	16281	0.993	-3.15	8	-0.82	0.206	3460	0.975	0.794	14595	0.981
CHDH	-4.85	8	-1.26	0.105	1774	0.982	0.895	16280	0.993	-2.47	8	-0.63	0.264	4484	0.975	0.736	13571	0.978
NTS	-4.85	8	-1.26	0.105	1775	0.982	0.895	16279	0.993	-4.56	8	-1.21	0.113	1852	0.975	0.887	16203	0.989
GPATCH3	-4.85	8	-1.26	0.105	1776	0.982	0.895	16278	0.993	-0.06	8	0.04	0.515	9307	0.975	0.485	8748	0.977
LHB	-4.84	8	-1.25	0.105	1777	0.982	0.895	16277	0.993	-0.28	8	-0.02	0.492	8860	0.975	0.508	9195	0.977
PTPLAD1	-4.84	8	-1.25	0.105	1778	0.982	0.895	16276	0.993	-3.93	8	-1.04	0.15	2478	0.975	0.85	15577	0.985
CCDC134	-4.84	8	-1.25	0.105	1779	0.982	0.895	16275	0.993	-1.56	8	-0.38	0.353	6148	0.975	0.647	11907	0.977
TNFRSF12A	-4.84	8	-1.25	0.105	1780	0.982	0.895	16274	0.993	-2.64	8	-0.68	0.249	4214	0.975	0.751	13841	0.979
ARRDC3	-4.84	8	-1.25	0.105	1781	0.982	0.895	16273	0.993	-3.85	8	-1.02	0.155	2569	0.975	0.845	15486	0.985
SLCO1B1	-4.84	8	-1.25	0.105	1782	0.982	0.895	16272	0.993	-3.18	8	-0.83	0.204	3405	0.975	0.796	14650	0.981
SPRY4	-4.84	8	-1.25	0.105	1783	0.982	0.895	16271	0.993	-1.76	8	-0.43	0.333	5758	0.975	0.667	12297	0.977
D2HGDH	-4.84	8	-1.25	0.105	1784	0.982	0.895	16270	0.993	-3.28	8	-0.86	0.196	3263	0.975	0.804	14792	0.981
MKLN1	-4.83	8	-1.25	0.105	1785	0.982	0.895	16269	0.993	-4.01	8	-1.06	0.145	2400	0.975	0.855	15655	0.986
RICTOR	-4.83	8	-1.25	0.105	1786	0.982	0.895	16268	0.993	-7.42	8	-2.01	0.0224	380	0.975	0.978	17675	0.999
CECR5	-4.83	8	-1.25	0.106	1787	0.982	0.894	16267	0.993	-6.42	8	-1.73	0.0418	698	0.975	0.958	17357	0.997
COX7A2L	-4.83	8	-1.25	0.106	1788	0.982	0.894	16266	0.993	-3.29	8	-0.86	0.195	3249	0.975	0.805	14806	0.981
POLR2A	-4.83	8	-1.25	0.106	1789	0.982	0.894	16265	0.993	-0.17	8	0.01	0.503	9082	0.975	0.497	8973	0.977
TEKT4	-4.82	8	-1.25	0.106	1790	0.982	0.894	16264	0.993	-2.41	8	-0.61	0.269	4587	0.975	0.731	13468	0.978
TANC1	-4.82	8	-1.25	0.106	1791	0.982	0.894	16263	0.993	-2.02	8	-0.51	0.306	5253	0.975	0.694	12802	0.977
MTG1	-4.82	8	-1.25	0.106	1792	0.982	0.894	16262	0.993	2.6	8	0.78	0.782	14411	0.98	0.218	3644	0.977
EPHA8	-4.82	8	-1.25	0.106	1793	0.982	0.894	16261	0.993	-2.86	8	-0.74	0.23	3871	0.975	0.77	14184	0.98
FYN	-4.82	8	-1.25	0.106	1794	0.982	0.894	16260	0.993	-2.68	8	-0.69	0.245	4141	0.975	0.755	13914	0.98
SLC2A13	-4.82	8	-1.25	0.106	1795	0.982	0.894	16259	0.993	-4.26	8	-1.13	0.129	2134	0.975	0.871	15921	0.987
CLSTN1	-4.82	8	-1.25	0.106	1796	0.982	0.894	16258	0.993	-3.99	8	-1.05	0.146	2415	0.975	0.854	15640	0.986
DHX29	-4.82	8	-1.25	0.106	1797	0.982	0.894	16257	0.993	-10.79	8	-2.95	0.00161	59	0.488	0.998	17996	1
RAMP2	-4.82	8	-1.25	0.106	1798	0.982	0.894	16256	0.993	-0.18	8	0.01	0.502	9069	0.975	0.498	8986	0.977
F3	-4.81	8	-1.25	0.106	1799	0.982	0.894	16255	0.993	-2.65	8	-0.68	0.248	4184	0.975	0.752	13871	0.979
ASPM	-4.81	8	-1.25	0.106	1800	0.982	0.894	16254	0.993	0.31	8	0.14	0.557	10157	0.975	0.443	7898	0.977
MED10	-4.81	8	-1.25	0.106	1801	0.982	0.894	16253	0.993	-5.44	8	-1.46	0.0727	1204	0.975	0.927	16851	0.993
PHC3	-4.81	8	-1.25	0.106	1802	0.982	0.894	16252	0.993	-3.13	8	-0.81	0.208	3484	0.975	0.792	14571	0.981
FAM200B	-4.81	8	-1.24	0.107	1803	0.982	0.893	16251	0.992	-6.39	8	-1.72	0.0427	725	0.975	0.957	17330	0.997
SPAG1	-4.16	6	-1.24	0.107	1804	0.982	0.893	16250	0.992	-4.9	6	-1.52	0.0644	1084	0.975	0.936	16971	0.995
NPHP3	-4.81	8	-1.24	0.107	1805	0.982	0.893	16249	0.992	-1.44	8	-0.35	0.365	6381	0.975	0.635	11674	0.977
GALK2	-4.81	8	-1.24	0.107	1806	0.982	0.893	16248	0.992	-1.18	8	-0.27	0.393	6948	0.975	0.607	11107	0.977
SLC26A5	-4.8	8	-1.24	0.107	1807	0.982	0.893	16247	0.992	-4.38	8	-1.16	0.123	2026	0.975	0.877	16029	0.988
SLC11A2	-4.8	8	-1.24	0.107	1808	0.982	0.893	16246	0.992	-2.93	8	-0.76	0.224	3750	0.975	0.776	14305	0.98
HNRNPA3	-4.8	8	-1.24	0.107	1809	0.982	0.893	16245	0.992	-2.27	8	-0.58	0.283	4823	0.975	0.717	13232	0.978
RYR1	-4.8	8	-1.24	0.107	1810	0.982	0.893	16244	0.992	-4.09	8	-1.08	0.14	2323	0.975	0.86	15732	0.987
EPHA4	-4.8	8	-1.24	0.107	1811	0.982	0.893	16243	0.992	-2.81	8	-0.73	0.234	3938	0.975	0.766	14117	0.98
C18orf21	-4.8	8	-1.24	0.107	1812	0.982	0.893	16242	0.992	-2.98	8	-0.77	0.22	3695	0.975	0.78	14360	0.981
MTIF3	-4.8	8	-1.24	0.107	1813	0.982	0.893	16241	0.992	-1.93	8	-0.48	0.315	5416	0.975	0.685	12639	0.977
SLCO2A1	-4.8	8	-1.24	0.107	1814	0.982	0.893	16240	0.992	-4.94	8	-1.32	0.0939	1544	0.975	0.906	16511	0.99
HMX3	-4.79	8	-1.24	0.107	1815	0.982	0.893	16239	0.992	-4.95	8	-1.32	0.0933	1529	0.975	0.907	16526	0.99
NPTN	-4.79	8	-1.24	0.107	1816	0.982	0.893	16238	0.992	-4.07	8	-1.08	0.141	2336	0.975	0.859	15719	0.987
FAM171A1	-4.79	8	-1.24	0.107	1817	0.982	0.893	16237	0.992	-7.94	8	-2.15	0.0157	287	0.975	0.984	17768	1
ORMDL1	-4.79	8	-1.24	0.107	1818	0.982	0.893	16236	0.992	-2.31	8	-0.59	0.279	4754	0.975	0.721	13301	0.978
AKAP3	-4.79	8	-1.24	0.107	1819	0.982	0.893	16235	0.992	-4.3	8	-1.14	0.127	2104	0.975	0.873	15951	0.988
ARHGEF16	-4.79	8	-1.24	0.107	1820	0.982	0.893	16234	0.992	-2.68	8	-0.69	0.245	4144	0.975	0.755	13911	0.98
KIAA2013	-4.79	8	-1.24	0.107	1821	0.982	0.893	16233	0.992	-1.55	8	-0.37	0.354	6174	0.975	0.646	11881	0.977
C5orf46	-4.15	6	-1.24	0.108	1822	0.982	0.892	16232	0.992	-4.89	6	-1.52	0.0649	1096	0.975	0.935	16959	0.995
LASP1	-4.79	8	-1.24	0.108	1823	0.982	0.892	16231	0.992	-5.08	8	-1.36	0.0876	1431	0.975	0.912	16624	0.991
OR8K5	-4.79	8	-1.24	0.108	1824	0.982	0.892	16230	0.992	-3.78	8	-1	0.16	2666	0.975	0.84	15389	0.985
TMEM74B	-4.79	8	-1.24	0.108	1825	0.982	0.892	16229	0.992	-3.24	8	-0.84	0.199	3322	0.975	0.801	14733	0.981
PPP1R27	-4.78	8	-1.24	0.108	1826	0.982	0.892	16228	0.992	-5.01	8	-1.34	0.0904	1483	0.975	0.91	16572	0.991
ANKZF1	-4.78	8	-1.24	0.108	1827	0.982	0.892	16227	0.992	-3.57	8	-0.94	0.175	2924	0.975	0.825	15131	0.985
C1GALT1C1	-4.78	8	-1.24	0.108	1828	0.982	0.892	16226	0.992	-5.17	8	-1.38	0.0834	1362	0.975	0.917	16693	0.991
NEDD9	-4.78	8	-1.24	0.108	1829	0.982	0.892	16225	0.992	-7.67	8	-2.08	0.0189	342	0.975	0.981	17713	1
SNURF	-2.39	2	-1.24	0.108	1830	0.982	0.892	16224	0.992	-2.16	2	-1.15	0.126	2090	0.975	0.874	15965	0.988
PROS1	-4.78	8	-1.24	0.108	1831	0.982	0.892	16223	0.992	-4.57	8	-1.21	0.112	1848	0.975	0.888	16207	0.989
BLVRB	-4.78	8	-1.24	0.108	1832	0.982	0.892	16222	0.992	-4.19	8	-1.11	0.133	2205	0.975	0.867	15850	0.987
KIFC1	-4.78	8	-1.24	0.108	1833	0.982	0.892	16221	0.992	-3.53	8	-0.93	0.177	2961	0.975	0.823	15094	0.984
LRRK2	-4.78	8	-1.24	0.108	1834	0.982	0.892	16220	0.992	-7.23	8	-1.95	0.0253	428	0.975	0.975	17627	0.998
GPT2	-4.78	8	-1.24	0.108	1835	0.982	0.892	16219	0.992	-2.27	8	-0.58	0.282	4815	0.975	0.718	13240	0.978
CD300LF	-4.78	8	-1.24	0.108	1836	0.982	0.892	16218	0.992	-5.61	8	-1.5	0.0664	1123	0.975	0.934	16932	0.995
IMMP1L	-4.14	6	-1.24	0.108	1837	0.982	0.892	16217	0.992	-4.34	6	-1.34	0.0906	1486	0.975	0.909	16569	0.991
OGG1	-4.77	8	-1.23	0.108	1838	0.982	0.892	16216	0.992	0.45	8	0.18	0.572	10445	0.975	0.428	7610	0.977
OR9Q2	-4.77	8	-1.23	0.109	1839	0.982	0.891	16215	0.992	-3.13	8	-0.81	0.208	3492	0.975	0.792	14563	0.981
PINLYP	-4.77	8	-1.23	0.109	1840	0.982	0.891	16214	0.992	-2.1	8	-0.53	0.299	5117	0.975	0.701	12938	0.978
ELF4	-4.77	8	-1.23	0.109	1841	0.982	0.891	16213	0.992	-3.77	8	-0.99	0.161	2684	0.975	0.839	15371	0.985
TOMM5	-4.77	8	-1.23	0.109	1842	0.982	0.891	16212	0.992	-2.29	8	-0.58	0.281	4785	0.975	0.719	13270	0.978
TRIM32	-4.76	8	-1.23	0.109	1843	0.982	0.891	16211	0.992	-2.83	8	-0.73	0.232	3909	0.975	0.768	14146	0.98
ZNF70	-4.76	8	-1.23	0.109	1844	0.982	0.891	16210	0.992	-3.7	8	-0.97	0.165	2756	0.975	0.835	15299	0.985
HEPACAM2	-4.76	8	-1.23	0.109	1845	0.982	0.891	16209	0.992	-5.88	8	-1.58	0.0571	949	0.975	0.943	17106	0.995
PEG10	-4.76	8	-1.23	0.109	1846	0.982	0.891	16208	0.992	-5.89	8	-1.58	0.0569	942	0.975	0.943	17113	0.995
RAP1A	-4.76	8	-1.23	0.109	1847	0.982	0.891	16207	0.992	-0.62	8	-0.12	0.454	8132	0.975	0.546	9923	0.977
ATP6AP2	-4.76	8	-1.23	0.109	1848	0.982	0.891	16206	0.992	-1.24	8	-0.29	0.386	6845	0.975	0.614	11210	0.977
ADM	-4.75	8	-1.23	0.109	1849	0.982	0.891	16205	0.992	-1.7	8	-0.42	0.339	5852	0.975	0.661	12203	0.977
DEFB132	-4.75	8	-1.23	0.109	1850	0.982	0.891	16204	0.992	-1.35	8	-0.32	0.375	6598	0.975	0.625	11457	0.977
SLC22A23	-4.75	8	-1.23	0.109	1851	0.982	0.891	16203	0.992	-5.66	8	-1.52	0.0644	1083	0.975	0.936	16972	0.995
GPN2	-4.75	8	-1.23	0.11	1852	0.982	0.89	16202	0.992	-6.35	8	-1.71	0.0436	737	0.975	0.956	17318	0.997
DAW1	-4.75	8	-1.23	0.11	1853	0.982	0.89	16201	0.992	-1.25	8	-0.29	0.385	6808	0.975	0.615	11247	0.977
SIRPD	-4.75	8	-1.23	0.11	1854	0.982	0.89	16200	0.992	-2.21	8	-0.56	0.288	4910	0.975	0.712	13145	0.978
ARHGEF10L	-4.74	8	-1.23	0.11	1855	0.982	0.89	16199	0.992	-0.78	8	-0.16	0.436	7811	0.975	0.564	10244	0.977
OR5AP2	-4.74	8	-1.23	0.11	1856	0.982	0.89	16198	0.992	-3.71	8	-0.98	0.164	2746	0.975	0.836	15309	0.985
STEAP1B	-4.74	8	-1.23	0.11	1857	0.982	0.89	16197	0.992	-5.51	8	-1.48	0.0701	1163	0.975	0.93	16892	0.994
FCHSD1	-4.74	8	-1.23	0.11	1858	0.982	0.89	16196	0.992	-0.98	8	-0.22	0.414	7371	0.975	0.586	10684	0.977
SLC22A25	-4.74	8	-1.22	0.11	1859	0.982	0.89	16195	0.992	-5.26	8	-1.41	0.0799	1308	0.975	0.92	16747	0.992
SERPINI2	-4.74	8	-1.22	0.11	1860	0.982	0.89	16194	0.992	-6.41	8	-1.73	0.0421	702	0.975	0.958	17353	0.997
U2AF1L4	-4.73	8	-1.22	0.11	1861	0.982	0.89	16193	0.992	-10.14	8	-2.76	0.00285	80	0.641	0.997	17975	1
EIF3E	-4.73	8	-1.22	0.111	1862	0.982	0.889	16192	0.992	-0.22	8	-0.01	0.498	8980	0.975	0.502	9075	0.977
HAPLN4	-4.73	8	-1.22	0.111	1863	0.982	0.889	16191	0.992	-3.48	8	-0.91	0.181	3014	0.975	0.819	15041	0.983
NDN	-4.73	8	-1.22	0.111	1864	0.982	0.889	16190	0.992	-5.08	8	-1.36	0.0876	1430	0.975	0.912	16625	0.991
MORN5	-4.73	8	-1.22	0.111	1865	0.982	0.889	16189	0.992	0.79	8	0.28	0.609	11170	0.975	0.391	6885	0.977
FAM135A	-4.73	8	-1.22	0.111	1866	0.982	0.889	16188	0.992	-3.01	8	-0.78	0.217	3646	0.975	0.783	14409	0.981
FAM69B	-4.73	8	-1.22	0.111	1867	0.982	0.889	16187	0.992	-1.06	8	-0.24	0.406	7208	0.975	0.594	10847	0.977
ZNF770	-4.73	8	-1.22	0.111	1868	0.982	0.889	16186	0.992	-4.33	8	-1.15	0.125	2079	0.975	0.875	15976	0.988
KBTBD13	-4.73	8	-1.22	0.111	1869	0.982	0.889	16185	0.992	-3.35	8	-0.88	0.19	3177	0.975	0.81	14878	0.982
MANF	-4.73	8	-1.22	0.111	1870	0.982	0.889	16184	0.992	-4.09	8	-1.08	0.14	2320	0.975	0.86	15735	0.987
MAFK	-4.73	8	-1.22	0.111	1871	0.982	0.889	16183	0.992	-6.42	8	-1.73	0.042	699	0.975	0.958	17356	0.997
C9orf152	-4.72	8	-1.22	0.111	1872	0.982	0.889	16182	0.992	-1.47	8	-0.35	0.362	6332	0.975	0.638	11723	0.977
TRIM68	-4.72	8	-1.22	0.111	1873	0.982	0.889	16181	0.992	-5.66	8	-1.52	0.0646	1088	0.975	0.935	16967	0.995
CIB2	-4.72	8	-1.22	0.111	1874	0.982	0.889	16180	0.992	-1.83	8	-0.45	0.325	5613	0.975	0.675	12442	0.977
ARHGEF39	-4.71	8	-1.22	0.111	1875	0.982	0.889	16179	0.991	-2.73	8	-0.7	0.241	4079	0.975	0.759	13976	0.98
DTX3	-4.71	8	-1.22	0.111	1876	0.982	0.889	16178	0.991	-1.41	8	-0.34	0.369	6441	0.975	0.631	11614	0.977
MUC22	-4.71	8	-1.22	0.111	1877	0.982	0.889	16177	0.991	-2.79	8	-0.72	0.235	3965	0.975	0.765	14090	0.98
MAP7D2	-4.71	8	-1.22	0.112	1878	0.982	0.888	16176	0.991	-4.9	8	-1.31	0.0954	1572	0.975	0.905	16483	0.99
ECI2	-4.71	8	-1.22	0.112	1879	0.982	0.888	16175	0.991	-5.82	8	-1.56	0.0591	982	0.975	0.941	17073	0.995
FAM53C	-4.71	8	-1.22	0.112	1880	0.982	0.888	16174	0.991	-5.97	8	-1.61	0.0542	906	0.975	0.946	17149	0.996
VDAC1	-4.71	8	-1.22	0.112	1881	0.982	0.888	16173	0.991	-4.94	8	-1.32	0.0939	1545	0.975	0.906	16510	0.99
WEE2	-4.71	8	-1.22	0.112	1882	0.982	0.888	16172	0.991	-5.65	8	-1.51	0.0649	1099	0.975	0.935	16956	0.995
PCSK7	-4.71	8	-1.22	0.112	1883	0.982	0.888	16171	0.991	-2.36	8	-0.6	0.274	4676	0.975	0.726	13379	0.978
LMF2	-4.71	8	-1.22	0.112	1884	0.982	0.888	16170	0.991	-6.12	8	-1.65	0.0498	842	0.975	0.95	17213	0.996
CYB5RL	-4.71	8	-1.22	0.112	1885	0.982	0.888	16169	0.991	-3.11	8	-0.81	0.209	3511	0.975	0.791	14544	0.981
PHF3	-4.71	8	-1.22	0.112	1886	0.982	0.888	16168	0.991	-1.67	8	-0.41	0.342	5919	0.975	0.658	12136	0.977
SLC30A9	-4.71	8	-1.22	0.112	1887	0.982	0.888	16167	0.991	-3.84	8	-1.01	0.156	2575	0.975	0.844	15480	0.985
PLEKHG4	-4.71	8	-1.22	0.112	1888	0.982	0.888	16166	0.991	-3.87	8	-1.02	0.154	2546	0.975	0.846	15509	0.985
TENM2	-4.71	8	-1.22	0.112	1889	0.982	0.888	16165	0.991	-4.91	8	-1.31	0.095	1565	0.975	0.905	16490	0.99
LRRC6	-4.7	8	-1.22	0.112	1890	0.982	0.888	16164	0.991	-4.86	8	-1.3	0.0973	1599	0.975	0.903	16456	0.99
ACBD6	-4.7	8	-1.22	0.112	1891	0.982	0.888	16163	0.991	-0.69	8	-0.14	0.446	8003	0.975	0.554	10052	0.977
NFE2L2	-4.7	8	-1.22	0.112	1892	0.982	0.888	16162	0.991	-0.37	8	-0.05	0.481	8649	0.975	0.519	9406	0.977
KIF14	-4.7	8	-1.22	0.112	1893	0.982	0.888	16161	0.991	1.25	8	0.4	0.657	12095	0.975	0.343	5960	0.977
PDZD2	-4.7	8	-1.22	0.112	1894	0.982	0.888	16160	0.991	-5.96	8	-1.6	0.0548	915	0.975	0.945	17140	0.995
TMED6	-4.7	8	-1.21	0.112	1895	0.982	0.888	16159	0.991	-5.55	8	-1.49	0.0685	1145	0.975	0.932	16910	0.995
ESRP2	-4.7	8	-1.21	0.112	1896	0.982	0.888	16158	0.991	-7.33	8	-1.98	0.0237	400	0.975	0.976	17655	0.998
WDTC1	-4.7	8	-1.21	0.112	1897	0.982	0.888	16157	0.991	-7.06	8	-1.91	0.0283	486	0.975	0.972	17569	0.998
CBX3	-3.32	4	-1.21	0.112	1898	0.982	0.888	16156	0.991	-1.68	4	-0.61	0.272	4648	0.975	0.728	13407	0.978
GPR152	-4.69	8	-1.21	0.112	1899	0.982	0.888	16155	0.991	-7.31	8	-1.98	0.024	409	0.975	0.976	17646	0.998
RPA2	-4.69	8	-1.21	0.113	1900	0.982	0.887	16154	0.991	-2.55	8	-0.65	0.256	4345	0.975	0.744	13710	0.979
ZNF141	-4.06	6	-1.21	0.113	1901	0.982	0.887	16153	0.991	-6.19	6	-1.93	0.0267	453	0.975	0.973	17602	0.998
KBTBD4	-4.06	6	-1.21	0.113	1902	0.982	0.887	16152	0.991	-0.78	6	-0.2	0.422	7543	0.975	0.578	10512	0.977
ROBO1	-4.69	8	-1.21	0.113	1903	0.982	0.887	16151	0.991	-5.36	8	-1.43	0.0758	1250	0.975	0.924	16805	0.993
BPGM	-4.69	8	-1.21	0.113	1904	0.982	0.887	16150	0.991	-5.74	8	-1.54	0.0616	1032	0.975	0.938	17023	0.995
USP1	-4.69	8	-1.21	0.113	1905	0.982	0.887	16149	0.991	-3.86	8	-1.02	0.154	2559	0.975	0.846	15496	0.985
RNF141	-4.69	8	-1.21	0.113	1906	0.982	0.887	16148	0.991	-1.29	8	-0.3	0.381	6735	0.975	0.619	11320	0.977
FABP9	-4.69	8	-1.21	0.113	1907	0.982	0.887	16147	0.991	-5.23	8	-1.4	0.081	1324	0.975	0.919	16731	0.992
POU2F3	-4.69	8	-1.21	0.113	1908	0.982	0.887	16146	0.991	-5.38	8	-1.44	0.0751	1242	0.975	0.925	16813	0.993
CHRNA9	-4.69	8	-1.21	0.113	1909	0.982	0.887	16145	0.991	-6.23	8	-1.68	0.0468	794	0.975	0.953	17261	0.996
C6orf195	-4.69	8	-1.21	0.113	1910	0.982	0.887	16144	0.991	-5.02	8	-1.34	0.0901	1476	0.975	0.91	16579	0.991
FAM76B	-4.68	8	-1.21	0.113	1911	0.982	0.887	16143	0.991	-3.6	8	-0.94	0.172	2887	0.975	0.828	15168	0.985
KIAA1715	-4.68	8	-1.21	0.113	1912	0.982	0.887	16142	0.991	-5.44	8	-1.46	0.0727	1203	0.975	0.927	16852	0.993
ZNF106	-4.68	8	-1.21	0.113	1913	0.982	0.887	16141	0.991	-0.7	8	-0.14	0.445	7971	0.975	0.555	10084	0.977
MYNN	-4.68	8	-1.21	0.113	1914	0.982	0.887	16140	0.991	-0.22	8	0	0.498	8988	0.975	0.502	9067	0.977
TMEM255B	-4.68	8	-1.21	0.113	1915	0.982	0.887	16139	0.991	-2.93	8	-0.76	0.224	3754	0.975	0.776	14301	0.98
LSM5	-4.05	6	-1.21	0.113	1916	0.982	0.887	16138	0.991	-4.47	6	-1.38	0.0841	1372	0.975	0.916	16683	0.991
SLC25A48	-4.68	8	-1.21	0.114	1917	0.982	0.886	16137	0.991	1.5	8	0.47	0.681	12573	0.975	0.319	5482	0.977
PPP2R5B	-4.67	8	-1.21	0.114	1918	0.982	0.886	16136	0.991	-7.26	8	-1.96	0.0248	421	0.975	0.975	17634	0.998
VPS37C	-4.67	8	-1.21	0.114	1919	0.982	0.886	16135	0.991	-2.16	8	-0.55	0.293	4993	0.975	0.707	13062	0.978
SYTL4	-4.67	8	-1.21	0.114	1920	0.982	0.886	16134	0.991	-2.43	8	-0.62	0.268	4571	0.975	0.732	13484	0.978
WAC	-4.67	8	-1.21	0.114	1921	0.982	0.886	16133	0.991	-1.74	8	-0.43	0.335	5783	0.975	0.665	12272	0.977
NUMBL	-4.67	8	-1.21	0.114	1922	0.982	0.886	16132	0.991	-5.22	8	-1.4	0.0813	1329	0.975	0.919	16726	0.992
DNAH12	-4.67	8	-1.21	0.114	1923	0.982	0.886	16131	0.991	-4.81	8	-1.28	0.1	1645	0.975	0.9	16410	0.99
HIST1H4A	-4.67	8	-1.21	0.114	1924	0.982	0.886	16130	0.991	-1.61	8	-0.39	0.348	6055	0.975	0.652	12000	0.977
PRDX5	-4.67	8	-1.21	0.114	1925	0.982	0.886	16129	0.991	-2.5	8	-0.64	0.261	4425	0.975	0.739	13630	0.978
STOM	-4.67	8	-1.21	0.114	1926	0.982	0.886	16128	0.991	-3.73	8	-0.98	0.163	2729	0.975	0.837	15326	0.985
PRMT7	-4.66	8	-1.2	0.114	1927	0.982	0.886	16127	0.991	-5.65	8	-1.51	0.0649	1098	0.975	0.935	16957	0.995
ARHGEF33	-4.66	8	-1.2	0.114	1928	0.982	0.886	16126	0.991	-3.88	8	-1.02	0.153	2538	0.975	0.847	15517	0.985
ARL6IP1	-4.66	8	-1.2	0.114	1929	0.982	0.886	16125	0.991	-5.43	8	-1.45	0.073	1213	0.975	0.927	16842	0.993
OR5M3	-4.66	8	-1.2	0.115	1930	0.982	0.885	16124	0.991	-5.8	8	-1.56	0.0596	992	0.975	0.94	17063	0.995
PSMA5	-4.35	7	-1.2	0.115	1931	0.982	0.885	16123	0.991	-1.5	8	-0.36	0.359	6270	0.975	0.641	11785	0.977
KIAA1462	-4.65	8	-1.2	0.115	1932	0.982	0.885	16122	0.991	-4.26	8	-1.13	0.129	2140	0.975	0.871	15915	0.987
CSPG4	-4.65	8	-1.2	0.115	1933	0.982	0.885	16121	0.991	-3.14	8	-0.82	0.207	3476	0.975	0.793	14579	0.981
ACYP2	-4.65	8	-1.2	0.115	1934	0.982	0.885	16120	0.991	0.03	8	0.06	0.526	9535	0.975	0.474	8520	0.977
ZNF780A	-3.29	4	-1.2	0.115	1935	0.982	0.885	16119	0.991	-1.56	4	-0.56	0.289	4928	0.975	0.711	13127	0.978
SPATS2	-4.65	8	-1.2	0.115	1936	0.982	0.885	16118	0.991	-2.15	8	-0.54	0.294	5017	0.975	0.706	13038	0.978
MAN2B2	-4.65	8	-1.2	0.115	1937	0.982	0.885	16117	0.991	-2.82	8	-0.73	0.233	3921	0.975	0.767	14134	0.98
STRADA	-4.65	8	-1.2	0.115	1938	0.982	0.885	16116	0.991	-2.18	8	-0.55	0.291	4969	0.975	0.709	13086	0.978
AHNAK2	-4.64	8	-1.2	0.115	1939	0.982	0.885	16115	0.991	0.24	8	0.12	0.549	9986	0.975	0.451	8069	0.977
MRPL3	-4.64	8	-1.2	0.115	1940	0.982	0.885	16114	0.991	-1.04	8	-0.23	0.408	7256	0.975	0.592	10799	0.977
BCLAF1	-4.64	8	-1.2	0.115	1941	0.982	0.885	16113	0.991	-5.46	8	-1.46	0.0716	1184	0.975	0.928	16871	0.993
CHSY3	-4.64	8	-1.2	0.115	1942	0.982	0.885	16112	0.991	-7.24	8	-1.96	0.0252	425	0.975	0.975	17630	0.998
SGMS1	-4.64	8	-1.2	0.115	1943	0.982	0.885	16111	0.991	-2.44	8	-0.62	0.267	4552	0.975	0.733	13503	0.978
DYX1C1	-4.63	8	-1.2	0.116	1944	0.982	0.884	16110	0.991	-2.84	8	-0.73	0.231	3894	0.975	0.769	14161	0.98
INS-IGF2	-4.63	8	-1.2	0.116	1945	0.982	0.884	16109	0.991	-1.79	8	-0.44	0.329	5666	0.975	0.671	12389	0.977
PPP2R3A	-4.63	8	-1.2	0.116	1946	0.982	0.884	16108	0.991	-3.98	8	-1.05	0.147	2432	0.975	0.853	15623	0.986
AP1M1	-4.63	8	-1.2	0.116	1947	0.982	0.884	16107	0.991	-6.59	8	-1.78	0.0378	633	0.975	0.962	17422	0.997
ZNF655	-4.63	8	-1.2	0.116	1948	0.982	0.884	16106	0.991	-6.49	8	-1.75	0.0402	673	0.975	0.96	17382	0.997
OR5T1	-4.63	8	-1.2	0.116	1949	0.982	0.884	16105	0.991	-0.42	8	-0.06	0.476	8544	0.975	0.524	9511	0.977
UNC13C	-4.63	8	-1.2	0.116	1950	0.982	0.884	16104	0.991	-0.78	8	-0.16	0.436	7806	0.975	0.564	10249	0.977
PLA2G3	-4.63	8	-1.2	0.116	1951	0.982	0.884	16103	0.991	-2.97	8	-0.77	0.221	3713	0.975	0.779	14342	0.981
TMEM132C	-4.63	8	-1.2	0.116	1952	0.982	0.884	16102	0.991	-2.71	8	-0.7	0.242	4098	0.975	0.758	13957	0.98
NADK	-4.63	8	-1.19	0.116	1953	0.982	0.884	16101	0.991	-5.2	8	-1.39	0.0823	1344	0.975	0.918	16711	0.991
OR11H4	-4.63	8	-1.19	0.116	1954	0.982	0.884	16100	0.991	-1.83	8	-0.45	0.325	5604	0.975	0.675	12451	0.977
CMTM7	-4.63	8	-1.19	0.116	1955	0.982	0.884	16099	0.991	-4.7	8	-1.25	0.105	1734	0.975	0.895	16321	0.989
ELMOD1	-4.62	8	-1.19	0.116	1956	0.982	0.884	16098	0.991	-5.39	8	-1.44	0.0746	1233	0.975	0.925	16822	0.993
TAS2R7	-4.62	8	-1.19	0.116	1957	0.982	0.884	16097	0.991	-3.86	8	-1.02	0.155	2563	0.975	0.845	15492	0.985
PCDHB5	-4.62	8	-1.19	0.116	1958	0.982	0.884	16096	0.991	-0.62	8	-0.12	0.453	8119	0.975	0.547	9936	0.977
MBD6	-4.62	8	-1.19	0.116	1959	0.982	0.884	16095	0.991	-2.44	8	-0.62	0.267	4540	0.975	0.733	13515	0.978
NT5C	-4.62	8	-1.19	0.116	1960	0.982	0.884	16094	0.991	-3.23	8	-0.84	0.2	3340	0.975	0.8	14715	0.981
EIF2B5	-4.62	8	-1.19	0.117	1961	0.982	0.883	16093	0.991	-8.51	8	-2.31	0.0104	204	0.91	0.99	17851	1
TTK	-4.62	8	-1.19	0.117	1962	0.982	0.883	16092	0.991	-1.95	8	-0.49	0.313	5372	0.975	0.687	12683	0.977
C6orf10	-4.62	8	-1.19	0.117	1963	0.982	0.883	16091	0.991	-6.4	8	-1.72	0.0424	712	0.975	0.958	17343	0.997
CORO1A	-4.61	8	-1.19	0.117	1964	0.982	0.883	16090	0.991	-4.53	8	-1.2	0.114	1881	0.975	0.886	16174	0.988
CLLU1	-4.61	8	-1.19	0.117	1965	0.982	0.883	16089	0.991	-1.9	8	-0.47	0.318	5481	0.975	0.682	12574	0.977
TSPAN9	-4.61	8	-1.19	0.117	1966	0.982	0.883	16088	0.991	-3.35	8	-0.88	0.19	3179	0.975	0.81	14876	0.982
DIS3	-4.61	8	-1.19	0.117	1967	0.982	0.883	16087	0.991	-4.36	8	-1.16	0.123	2045	0.975	0.877	16010	0.988
SAMD5	-4.61	8	-1.19	0.117	1968	0.982	0.883	16086	0.991	-9.58	8	-2.61	0.00455	104	0.787	0.995	17951	1
SLC25A12	-4.61	8	-1.19	0.117	1969	0.982	0.883	16085	0.991	-3.86	8	-1.02	0.155	2565	0.975	0.845	15490	0.985
USP31	-4.61	8	-1.19	0.117	1970	0.982	0.883	16084	0.991	-4.35	8	-1.15	0.124	2059	0.975	0.876	15996	0.988
NOL12	-4.61	8	-1.19	0.117	1971	0.982	0.883	16083	0.991	-1.43	8	-0.34	0.366	6399	0.975	0.634	11656	0.977
AIDA	-4.61	8	-1.19	0.117	1972	0.982	0.883	16082	0.991	1.26	8	0.41	0.658	12112	0.975	0.342	5943	0.977
SPAG16	-4.61	8	-1.19	0.117	1973	0.982	0.883	16081	0.991	-3.2	8	-0.83	0.202	3380	0.975	0.798	14675	0.981
TGM4	-4.61	8	-1.19	0.117	1974	0.982	0.883	16080	0.991	-6.13	8	-1.65	0.0496	840	0.975	0.95	17215	0.996
GLIS3	-4.61	8	-1.19	0.117	1975	0.982	0.883	16079	0.991	-3.78	8	-1	0.16	2668	0.975	0.84	15387	0.985
SH3BP5	-4.6	8	-1.19	0.117	1976	0.982	0.883	16078	0.991	-0.62	8	-0.12	0.454	8127	0.975	0.546	9928	0.977
USP35	-4.6	8	-1.19	0.118	1977	0.982	0.882	16077	0.991	-8.97	8	-2.44	0.00734	156	0.85	0.993	17899	1
GXYLT2	-4.6	8	-1.19	0.118	1978	0.982	0.882	16076	0.991	-4.45	8	-1.18	0.119	1955	0.975	0.881	16100	0.988
MADCAM1	-4.6	8	-1.19	0.118	1979	0.982	0.882	16075	0.991	-1.91	8	-0.48	0.317	5450	0.975	0.683	12605	0.977
BPTF	-4.59	8	-1.19	0.118	1980	0.982	0.882	16074	0.991	-2.5	8	-0.64	0.261	4418	0.975	0.739	13637	0.979
RUNDC3A	-4.59	8	-1.19	0.118	1981	0.982	0.882	16073	0.991	-6.19	8	-1.66	0.048	811	0.975	0.952	17244	0.996
PRSS45	-4.59	8	-1.19	0.118	1982	0.982	0.882	16072	0.991	-5.65	8	-1.51	0.065	1100	0.975	0.935	16955	0.995
NF1	-4.59	8	-1.19	0.118	1983	0.982	0.882	16071	0.991	-1.41	8	-0.34	0.368	6434	0.975	0.632	11621	0.977
MTUS2	-4.59	8	-1.19	0.118	1984	0.982	0.882	16070	0.991	-3.4	8	-0.89	0.187	3113	0.975	0.813	14942	0.983
HCN1	-4.59	8	-1.18	0.118	1985	0.982	0.882	16069	0.991	-5.15	8	-1.38	0.0845	1379	0.975	0.915	16676	0.991
CLPB	-4.59	8	-1.18	0.118	1986	0.982	0.882	16068	0.991	-1.46	8	-0.35	0.363	6357	0.975	0.637	11698	0.977
TOMM40	-4.59	8	-1.18	0.118	1987	0.982	0.882	16067	0.991	-5.07	8	-1.35	0.0878	1434	0.975	0.912	16621	0.991
CCDC150	-4.58	8	-1.18	0.118	1988	0.982	0.882	16066	0.991	-4.06	8	-1.07	0.141	2344	0.975	0.859	15711	0.987
FAM185A	-4.58	8	-1.18	0.118	1989	0.982	0.882	16065	0.991	-1.99	8	-0.5	0.31	5315	0.975	0.69	12740	0.977
PRPF19	-4.58	8	-1.18	0.119	1990	0.982	0.881	16064	0.991	-5.76	8	-1.55	0.0609	1021	0.975	0.939	17034	0.995
GTF2A2	-4.58	8	-1.18	0.119	1991	0.982	0.881	16063	0.991	-1.32	8	-0.31	0.378	6662	0.975	0.622	11393	0.977
ZNF879	-4.58	8	-1.18	0.119	1992	0.982	0.881	16062	0.99	-2.82	8	-0.73	0.233	3930	0.975	0.767	14125	0.98
ASF1A	-4.58	8	-1.18	0.119	1993	0.982	0.881	16061	0.99	-7.83	8	-2.12	0.017	304	0.975	0.983	17751	1
TBPL1	-4.58	8	-1.18	0.119	1994	0.982	0.881	16060	0.99	-7.24	8	-1.96	0.0251	424	0.975	0.975	17631	0.998
C5orf30	-4.57	8	-1.18	0.119	1995	0.982	0.881	16059	0.99	-3.93	8	-1.04	0.15	2488	0.975	0.85	15567	0.985
SHC1	-4.57	8	-1.18	0.119	1996	0.982	0.881	16058	0.99	0.61	8	0.23	0.589	10793	0.975	0.411	7262	0.977
NKX3-1	-4.57	8	-1.18	0.119	1997	0.982	0.881	16057	0.99	0.56	8	0.21	0.584	10683	0.975	0.416	7372	0.977
NEK3	-4.57	8	-1.18	0.119	1998	0.982	0.881	16056	0.99	-3.49	8	-0.92	0.18	3007	0.975	0.82	15048	0.984
CLTCL1	-4.57	8	-1.18	0.119	1999	0.982	0.881	16055	0.99	-2.14	8	-0.54	0.295	5030	0.975	0.705	13025	0.978
[truncated: 16,055 more rows]
