# Supplementary material for: Loss of Integrin-Linked Kinase Sensitizes Breast Cancer to SRC Inhibitors
Source: Oxford University Press journal article supplement (doi:10.1158/0008-5472.can-21-0373), 2021-12-17
Supplement: can-21-0373_supplementary_dataset_5_supp5.xlsx [file can-21-0373_supplementary_dataset_5_supp5.xlsx]

## Sheet: 260140_3_supp_7541933_r2pzm7
Gene ID	rep1_459_Bos	rep2_459_Bos	rep3_459_Bos	rep1_E8n23_Bos	rep2_E8n23_Bos	rep3_E8n23_Bos	Mean 1	Mean 2	TTest	FC	LFC
TMEM132A	14.5843	30.8435	46.2003	67.9328	120.281	122.346	30.5427	103.52	0.0358798	3.38936	1.76101
KDM7A	17.5188	18.2147	20.0879	51.6826	35.8154	40.8872	18.6071	42.7951	0.0325673	2.29993	1.20159
RHBDF1	163.58	169.05	134.592	297.728	317.239	332.883	155.741	315.95	0.000413804	2.02869	1.02055
MLXIPL	3.35207	11.2168	2.01555	17.8768	19.2866	32.3929	5.52815	23.1854	0.0408222	4.19406	2.06835
HDAC9	136.393	106.787	117.514	62.9988	54.5969	58.0328	120.231	58.5428	0.0138273	0.486918	-1.03825
LIMCH1	1333.83	1424.51	1419.17	571.84	436.386	543.743	1392.51	517.323	0.000132702	0.371505	-1.42855
TFRC	1198.31	1044.77	1143.98	620.779	431.672	540.167	1129.02	530.873	0.00127026	0.470207	-1.08863
TEAD2	122.864	130.756	121.54	346.694	354.917	361.511	125.053	354.374	6.11e-06	2.83379	1.50273
DZANK1	16.6748	17.049	7.03978	27.5337	24.4142	34.5351	13.5878	28.8277	0.0267591	2.12158	1.08514
ICAM1	60.5201	68.1914	91.3943	147.607	182.87	154.158	73.3686	161.545	0.00375224	2.20183	1.1387
LYZ	8.71764	1.3787	1.01261	46.0548	33.9181	26.5588	3.70298	35.5106	0.017771	9.58972	3.26149
P3H2	220.799	147.761	195.856	90.7071	78.1615	79.5283	188.139	82.799	0.0352453	0.440095	-1.18411
TBC1D2	130.252	154.04	131.57	67.2345	61.5736	76.9827	138.621	68.5969	0.00334927	0.494854	-1.01493
IL11	541.199	500.166	527.29	284.381	233.087	249.298	522.885	255.588	0.000215158	0.488804	-1.03267
SYDE2	44.1928	34.0216	45.1886	7.64476	23.7323	16.826	41.1343	16.0677	0.0148895	0.390615	-1.35618
SERPIND1	11.2422	1.45098	12.0588	46.4094	54.8349	34.4868	8.25064	45.2437	0.010362	5.48366	2.45514
YPEL1	5.15426	13.4021	4.02306	16.8492	20.4201	19.2452	7.52646	18.8381	0.0491411	2.50292	1.32361
GGT1	6.71256	9.3918	14.069	61.2379	71.0706	55.4371	10.0578	62.5819	0.00237055	6.22222	2.63743
NFKBIA	636.76	769.14	700.05	1460.09	1669.82	1205.26	701.984	1445.05	0.0240945	2.05853	1.04161
CST3	2093.62	2306.27	2195.56	5688.1	7517.64	6085.59	2198.48	6430.44	0.0158845	2.92495	1.54841
CST4	148.448	137.552	108.485	569.699	491.479	446.198	131.495	502.459	0.00521815	3.82112	1.934
TIMP1	1232.34	1126.67	1100.8	2837.55	4306.71	3599.53	1153.27	3581.26	0.0282737	3.10531	1.63474
CACNG7	18.3858	17.1426	16.075	42.2949	32.5092	41.7448	17.2011	38.8496	0.0174036	2.25855	1.1754
HBP1	142.386	138.557	153.672	290.279	325.34	286.912	144.872	300.844	0.00272217	2.07662	1.05424
STX1A	124.805	139.572	87.391	240.284	241.146	256.431	117.256	245.954	0.00854727	2.09758	1.06873
NSUN5P2	8.57637	11.5134	13.0611	25.4265	36.7429	28.0995	11.0503	30.0896	0.0198552	2.72297	1.44518
COL12A1	125.924	150.527	94.4146	54.4739	55.6891	39.1498	123.622	49.7709	0.0347579	0.402606	-1.31256
ZBTB24	53.74	61.0528	50.2176	18.2855	29.7074	27.6066	55.0035	25.1998	0.00337734	0.458149	-1.12611
ADGRG6	157.773	111.202	135.585	75.714	46.3791	53.5566	134.853	58.5499	0.0128421	0.434175	-1.20365
WWC1	168.99	189.227	135.593	72.5852	73.3518	89.5212	164.603	78.4861	0.0216491	0.476819	-1.06849
DPYSL3	32.3823	30.8351	31.1421	76.3616	62.9914	95.9186	31.4532	78.4238	0.0387337	2.49335	1.31809
EFEMP1	150.797	157.217	114.496	51.2821	22.9758	53.583	140.836	42.6136	0.00521263	0.302575	-1.72463
ST3GAL5	33.3836	35.1826	17.0848	64.6434	78.6653	87.9729	28.5504	77.0939	0.00590365	2.70028	1.43311
QPCT	27.0977	37.4452	21.1011	75.2095	91.3191	81.5041	28.548	82.6776	0.00126991	2.89609	1.53411
F3	514.688	392.674	375.642	197.165	151.027	150.427	427.668	166.206	0.0179039	0.388634	-1.36351
CTSD	5277.52	7450.17	7088.84	13360.9	16062.2	13600.4	6605.51	14341.2	0.00262225	2.17109	1.11842
DUSP1	74.9517	66.8463	75.3214	32.0948	13.5217	42.0224	72.3731	29.213	0.0260024	0.403644	-1.30885
TNFSF10	22.7537	12.7881	18.086	64.4965	37.3266	57.11	17.8759	52.9777	0.03746	2.96363	1.56737
LRP1	50.0125	74.6993	33.155	129.403	100.319	102.787	52.6223	110.836	0.0210538	2.10626	1.07468
C4BPB	323.921	369.436	373.613	97.1073	85.2338	82.2009	355.657	88.1806	0.00193394	0.247937	-2.01195
CITED1	16.3814	20.7313	18.09	80.5257	108.602	102.419	18.4009	97.182	0.0102221	5.28138	2.40091
ID1	232.788	270.294	351.535	721.383	870.026	777.277	284.872	789.562	0.00100445	2.77164	1.47074
AP1M2	234.864	182.849	237.032	50.2971	20.6809	44.4645	218.249	38.4809	0.00294124	0.176317	-2.50376
SAT1	457.293	595.513	405.775	920.504	1290.23	840.705	486.194	1017.15	0.046362	2.09206	1.06493
RNF128	9.51945	9.25221	3.02289	32.6892	43.2457	31.8999	7.26485	35.9449	0.00526794	4.94779	2.30678
DPH6	13.1536	9.23824	10.0484	20.1313	23.0953	31.9334	10.8134	25.0533	0.045116	2.31688	1.21218
ADAM19	107.937	91.1217	109.486	274.349	329.971	281.514	102.848	295.278	0.00434093	2.87101	1.52156
SORD	12.1717	9.30044	15.0682	4.40781	3.92493	8.79221	12.1801	5.70831	0.0468475	0.468659	-1.09339
COL6A1	315.445	362.235	302.33	1433.24	1811.94	1611.06	326.67	1618.75	0.00597421	4.95529	2.30897
COL6A2	17.2114	32.035	8.05015	97.5845	121.829	112.082	19.0989	110.498	0.000771727	5.7856	2.53247
MYO1F	7.89691	10.1367	2.01561	17.8806	17.0934	16.4547	6.68308	17.1429	0.0461229	2.56512	1.35903
CCN1	2766.14	2329.92	2276.91	1005.1	652.545	687.325	2457.65	781.658	0.00141321	0.31805	-1.65267
ITGA10	13.7193	7.23441	7.0448	120.544	159.896	117.051	9.33283	132.497	0.0107068	14.1969	3.8275
FAHD2B	6.10858	11.1655	8.03398	2.21648	0.191601	1.6425	8.43602	1.35019	0.0272575	0.160051	-2.6434
PLAC8	1478.3	1237.44	1376.98	366.438	269.688	313.822	1364.24	316.649	0.00155897	0.232106	-2.10714
ADAMTS16	23.6434	35.0329	30.1305	8.69269	16.7676	11.4109	29.6023	12.2904	0.0160075	0.415184	-1.26818
SSBP2	7.65569	12.6554	7.04028	34.8919	57.0758	51.0981	9.11713	47.6886	0.0221602	5.23066	2.38699
IQGAP2	6.80709	1.42651	3.02314	29.5743	43.3166	40.1976	3.75225	37.6962	0.00782906	10.0463	3.32859
SLC2A12	22.7082	15.0542	16.0796	58.2529	63.6325	63.4189	17.9473	61.7681	0.000213444	3.44163	1.78309
AUH	26.3333	10.5538	31.1341	51.8952	54.4044	36.9474	22.6738	47.749	0.0395192	2.10591	1.07445
ANKRD1	4218.73	3875.82	3808.57	949.786	607.952	857.905	3967.7	805.214	5.81e-05	0.202942	-2.30086
SESN3	99.3093	102.184	79.3535	233.704	196.436	215.225	93.6157	215.122	0.00134771	2.29792	1.20033
CNKSR2	29.5797	27.835	13.0579	0.110734	0.28776	2.46631	23.4909	0.954934	0.0474577	0.0406513	-4.62055
ZNF547	5.99013	13.5331	10.0454	19.0132	18.4299	25.6066	9.85621	21.0166	0.0245429	2.13232	1.09242
ZNF599	1.59703	5.70426	4.02084	10.5455	17.9878	17.5273	3.77404	15.3536	0.0242071	4.0682	2.02439
ANKH	118.553	134.014	130.574	266.897	347.36	356.445	127.714	323.567	0.01828	2.53354	1.34115
SUSD3	65.5474	60.8595	40.1748	7.65813	9.93373	13.1619	55.5272	10.2512	0.0245128	0.184616	-2.4374
TENT5B	28.1549	39.4268	41.1687	10.8048	8.68068	5.98624	36.2501	8.49057	0.0134863	0.234222	-2.09405
CIART	0.769216	3.41948	3.01431	10.4445	13.3088	7.3508	2.401	10.368	0.0272115	4.31821	2.11043
G6PD	176.738	164.635	192.84	328.621	499.451	403.021	178.071	410.364	0.0393109	2.3045	1.20445
RALGDS	148.356	220.196	174.77	510.473	584.339	618.835	181.107	571.216	0.00106528	3.15402	1.65719
ZG16B	1.57798	2.4425	0.005189	24.0569	20.2796	16.5225	1.34189	20.2863	0.0078009	15.1177	3.91817
ASRGL1	40.6232	29.5569	41.1732	13.9981	8.72099	15.0166	37.1178	12.5786	0.0104414	0.338882	-1.56114
SLC25A45	7.83793	5.8242	5.02769	20.017	26.0801	21.9571	6.22994	22.6847	0.00445395	3.64124	1.86443
NEXN	864.781	823.596	925.023	424.943	281.392	384.813	871.134	363.716	0.00108703	0.41752	-1.26008
NIPAL1	118.864	132.494	116.504	41.7277	61.4978	38.2548	122.621	47.1601	0.00169606	0.384602	-1.37856
FSTL1	675.841	649.814	647.814	228.032	228.471	206.117	657.823	220.873	4.47e-06	0.335764	-1.57448
MELTF	145.838	145.422	183.802	323.3	367.647	322.805	158.354	337.917	0.000873956	2.13394	1.09352
BORCS5	21.0288	16.0823	18.0839	46.5535	53.0167	37.0585	18.3983	45.5429	0.0203204	2.47538	1.30765
SLFN5	102.923	91.9794	76.3392	197.584	174.18	209.037	90.4139	193.601	0.00176609	2.14127	1.09847
FAM102A	116.661	133.049	163.72	397.724	435.59	463.261	137.81	432.192	0.00039231	3.13614	1.64899
SLC43A2	12.9263	19.4579	15.074	48.7059	74.6877	50.7399	15.8194	58.0445	0.0314983	3.66919	1.87546
SH3TC2	48.1811	71.4318	50.2252	119.971	123.577	108.122	56.6127	117.223	0.00425269	2.07062	1.05006
LONRF2	31.6422	29.5662	20.0955	62.4867	47.7465	70.6955	27.1013	60.3096	0.0215555	2.22534	1.15403
CDK5R2	7.7672	10.294	7.03664	24.2654	26.3181	19.0398	8.36596	23.2077	0.0102181	2.77407	1.472
DLK2	60.9531	44.2516	60.2536	22.5113	14.6177	15.8542	55.1528	17.6611	0.0102681	0.320221	-1.64286
SPATA5L1	67.1291	49.8963	44.1946	18.2866	25.0851	16.7428	53.74	20.0382	0.0277079	0.372872	-1.42325
NEGR1	227.319	192.665	193.838	51.3362	21.8456	52.5915	204.607	41.9244	0.000462807	0.204902	-2.28699
LRRC20	266.944	211.991	194.846	76.8624	54.6933	69.666	224.594	67.0739	0.012814	0.298645	-1.7435
TRIB1	109.783	93.3106	137.6	260.428	324.882	288.954	113.565	291.421	0.00227889	2.56613	1.35959
NET1	929.818	942.719	887.867	1869.9	1861.6	1871.74	920.135	1867.75	0.000196541	2.02986	1.02138
TCAP	5.99659	12.43	4.02486	17.9629	25.0712	20.9695	7.48381	21.3345	0.0145096	2.85075	1.51134
CTSF	110.772	85.3272	72.3254	188.176	188.441	249.469	89.475	208.695	0.0131109	2.33244	1.22184
FAM89B	190.781	195.23	174.767	353.145	473.023	456.897	186.926	427.688	0.0211071	2.28801	1.19409
MLF1	109.396	70.4149	89.3852	48.0442	33.4132	42.8359	89.7321	41.4311	0.0369777	0.46172	-1.11491
HYI	845.393	947.124	935.067	399.407	338.902	473.745	909.195	404.018	0.000672357	0.444369	-1.17017
CDH4	621.418	625.8	617.677	219.495	143.974	217.838	621.632	193.769	0.00314589	0.311711	-1.68172
MB21D2	45.3717	27.1702	27.1163	2.3046	9.80166	0.625122	33.2194	4.24379	0.0257448	0.127751	-2.9686
LINC01559	1.65324	0.0989929	0.00346273	13.5654	10.1313	18.6718	0.585232	14.1228	0.027497	24.1321	4.59288
COL18A1	80.659	101.145	93.4141	241.242	271.092	245.768	91.7395	252.701	0.000341144	2.75454	1.46181
CCBE1	130.084	112.526	98.438	66.2093	30.0574	40.9033	113.683	45.7233	0.00902684	0.402201	-1.31401
CSF1	353.471	418.659	398.739	750.158	995.518	738.485	390.29	828.054	0.0295109	2.12164	1.08518
SLITRK6	0	3.50815	3.01719	17.7803	16.8471	21.3331	2.17511	18.6535	0.00088498	8.57587	3.10028
PRMT3	85.5085	80.4106	74.3216	27.8751	31.0388	30.2223	80.0802	29.7121	0.00224045	0.371029	-1.4304
TCN2	20.2173	16.0089	13.0633	35.9751	39.2144	56.5476	16.4299	43.9124	0.0393723	2.67272	1.41831
EVI2B	188.477	180.181	183.793	87.4523	53.4721	54.4031	184.15	65.1092	0.00667598	0.353566	-1.49995
AKR1C1	5.07072	3.65082	0.00717968	31.5489	34.0555	33.9266	2.90957	33.177	0.000340878	11.4027	3.5113
TSPYL4	41.1897	62.2695	57.2476	14.0534	25.1287	35.726	53.569	24.9694	0.0327145	0.466116	-1.10124
IER5L	78.9639	89.7746	96.4232	201.881	227.707	222.502	88.3873	217.363	0.00041139	2.45922	1.2982
SH2D5	19.1279	38.4329	34.1472	10.821	2.85359	10.4864	30.5694	8.05368	0.0444951	0.263456	-1.92437
SPOCK3	16.6063	16.0142	11.0561	60.077	58.368	41.7856	14.5589	53.4102	0.0154535	3.66856	1.87522
ZNF493	16.51	8.29138	23.1034	37.1353	54.2715	39.7534	15.9682	43.7201	0.0168225	2.73794	1.45309
TSC22D2	207.616	197.426	220.96	77.9396	131.946	102.937	208.667	104.274	0.0113453	0.499714	-1.00082
PSAP	2933.88	3241.98	3068.35	5930.96	6954.9	5954.13	3081.4	6280	0.00762946	2.03803	1.02718
PHETA1	99.0614	137.496	122.543	271.25	450.334	394.982	119.7	372.189	0.0364	3.10935	1.63661
PAPSS2	645.87	555.839	555.417	276.973	185.074	216.898	585.709	226.315	0.000930526	0.386395	-1.37185
LAYN	378.338	382.215	321.402	145.001	147.425	188.238	360.651	160.221	0.00175917	0.444256	-1.17054
METTL6	66.9359	67.9647	71.3057	31.035	27.4973	42.9285	68.7354	33.8203	0.012392	0.492036	-1.02316
ITGA1	185.316	154.688	154.687	650.922	1163.41	737.331	164.897	850.555	0.0489109	5.1581	2.36684
LOC730101	65.0289	79.3242	58.2585	32.1233	25.2314	33.8261	67.5372	30.3936	0.0155328	0.450028	-1.15191
HLA-DPB1	9.3864	12.7365	2.02067	55.985	63.1465	40.7461	8.04786	53.2925	0.00968833	6.62195	2.72726
LOC105375304	0.706573	5.71108	4.02103	17.8076	15.8201	15.6346	3.47956	16.4208	0.00495121	4.71921	2.23855
MAGI2-AS3	11.4743	8.0299	10.0442	3.3014	1.47756	1.60043	9.84948	2.12646	0.00540577	0.215896	-2.21159
HLA-B	791.621	856.545	914.983	1576.21	1978.73	1701.98	854.383	1752.31	0.0116688	2.05096	1.0363
SUCLG2-AS1	43.187	37.4537	39.1701	9.77891	18.0418	23.1434	39.9369	16.988	0.0157233	0.425372	-1.2332
ZNF702P	30.7531	28.4466	26.118	11.8822	5.21806	9.57793	28.4392	8.89274	0.00196452	0.312693	-1.67718
LOC440028	15.9119	17.9911	15.0638	1.19689	0.283001	0.67953	16.3223	0.719807	0.00153897	0.0440997	-4.50309
SH3TC2-DT	31.5242	37.497	18.0901	102.659	75.4838	65.9017	29.0371	81.3481	0.024225	2.80152	1.48621
MALAT1	11377.8	17580.7	13689.6	28517.1	42380.9	29175.2	14216	33357.7	0.0371189	2.34648	1.2305
MC1R	9.61245	3.63824	9.0423	16.9298	20.6635	22.8086	7.431	20.134	0.00794721	2.70946	1.438
TUBB3	12.9729	10.4963	13.0648	36.0284	50.6677	56.4087	12.178	47.7016	0.0260812	3.91703	1.96976
ANXA8L1	15.922	16.8866	27.1003	0.107792	2.69745	5.19948	19.9696	2.66824	0.0267768	0.133615	-2.90385
HERC2P2	29.7676	17.3541	29.1323	62.5792	59.3773	54.0972	25.418	58.6845	0.00422994	2.30878	1.20713
HIST1H3C	32.5037	40.7255	41.1752	15.0661	19.156	15.9065	38.1348	16.7095	0.00801236	0.43817	-1.19044
